# Supplementary material
Source: ML conference proceedings conference paper supplement (https://openreview.net/forum?id=tu3qwNjrtw)
Supplement: supplementary_material [file attachment]

~~•~~ Unlearn  $\rightarrow$  Compress  $\dashrightarrow$   $\ominus$   $\dashrightarrow$  Compress  $\rightarrow$  Unlearn
