# Supplementary material
Source: ML conference proceedings conference paper supplement (https://openreview.net/forum?id=tu3qwNjrtw)
Supplement: supplementary_material [file attachment]

→●→ Edit → Compress ---○--- Compress → Edit
