# Supplementary material
Source: ML conference proceedings conference paper supplement (https://openreview.net/forum?id=tu3qwNjrtw)

Pruning

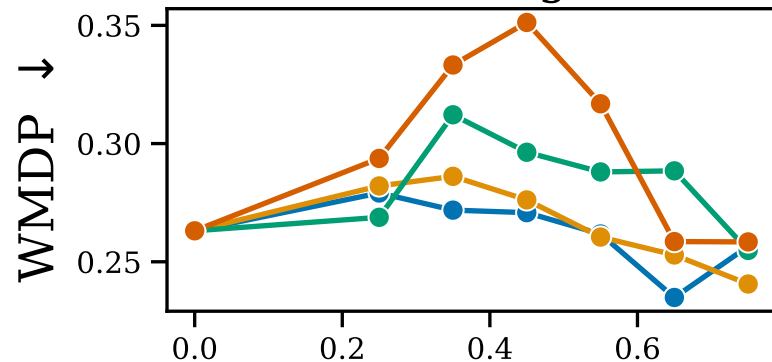

Quantization

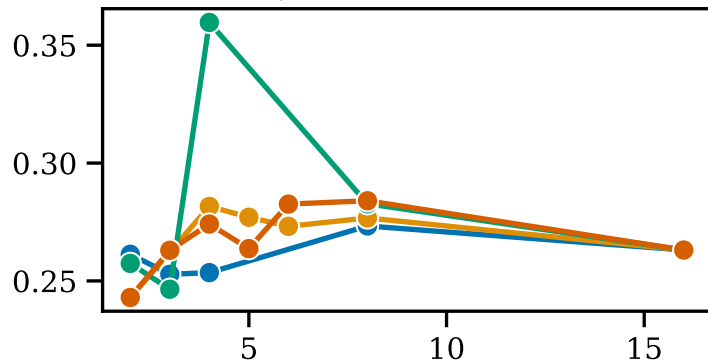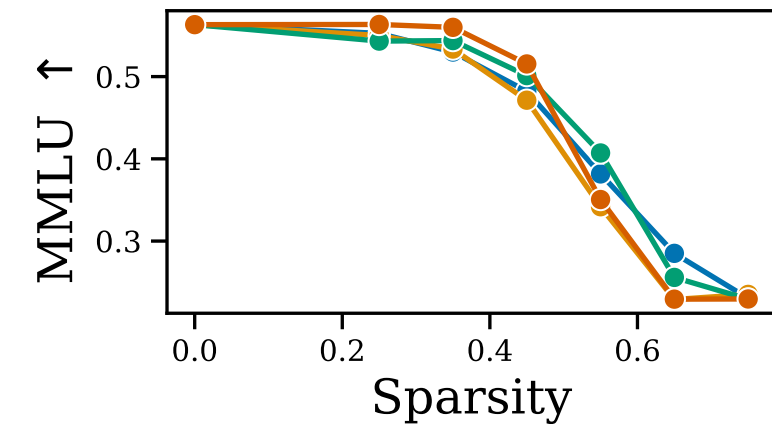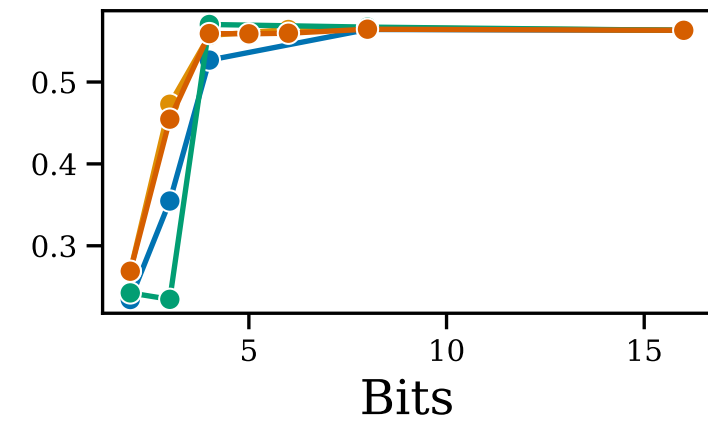

Sparsity

Bits

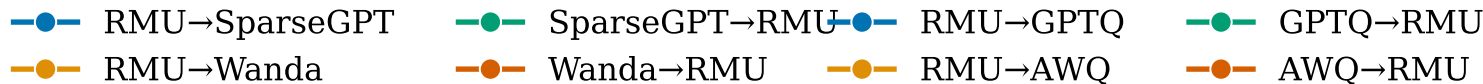

Supplement: supplementary_material [file attachment]

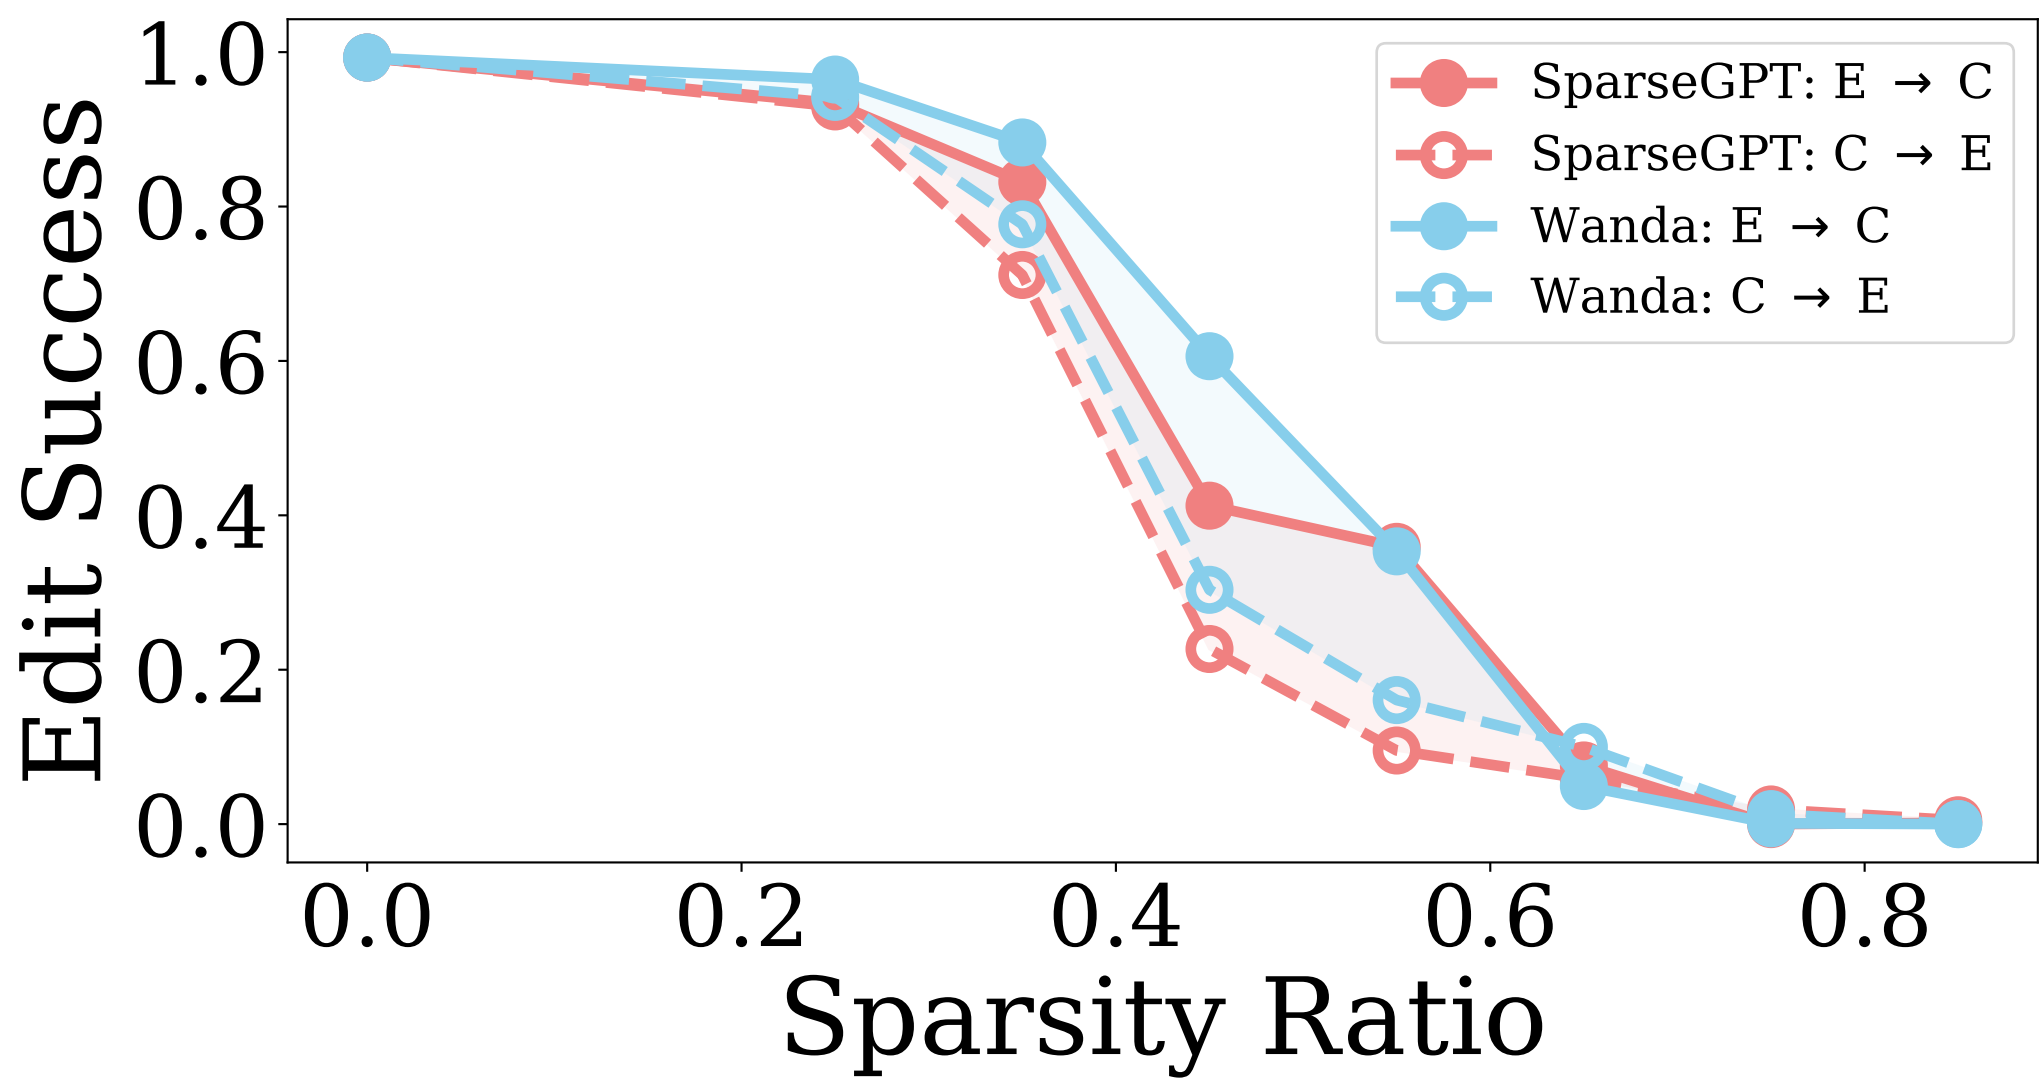

Supplement: supplementary_material [file attachment]

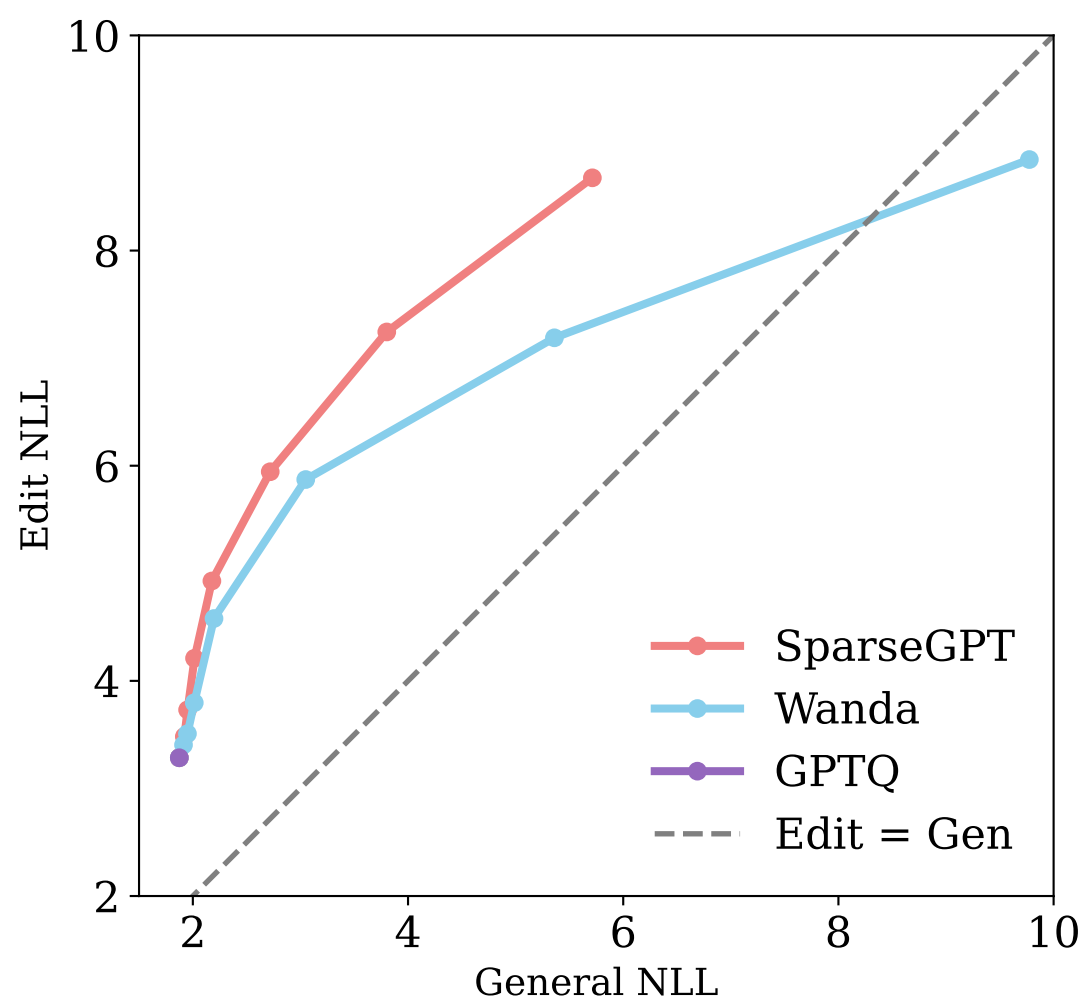

Supplement: supplementary_material [file attachment]

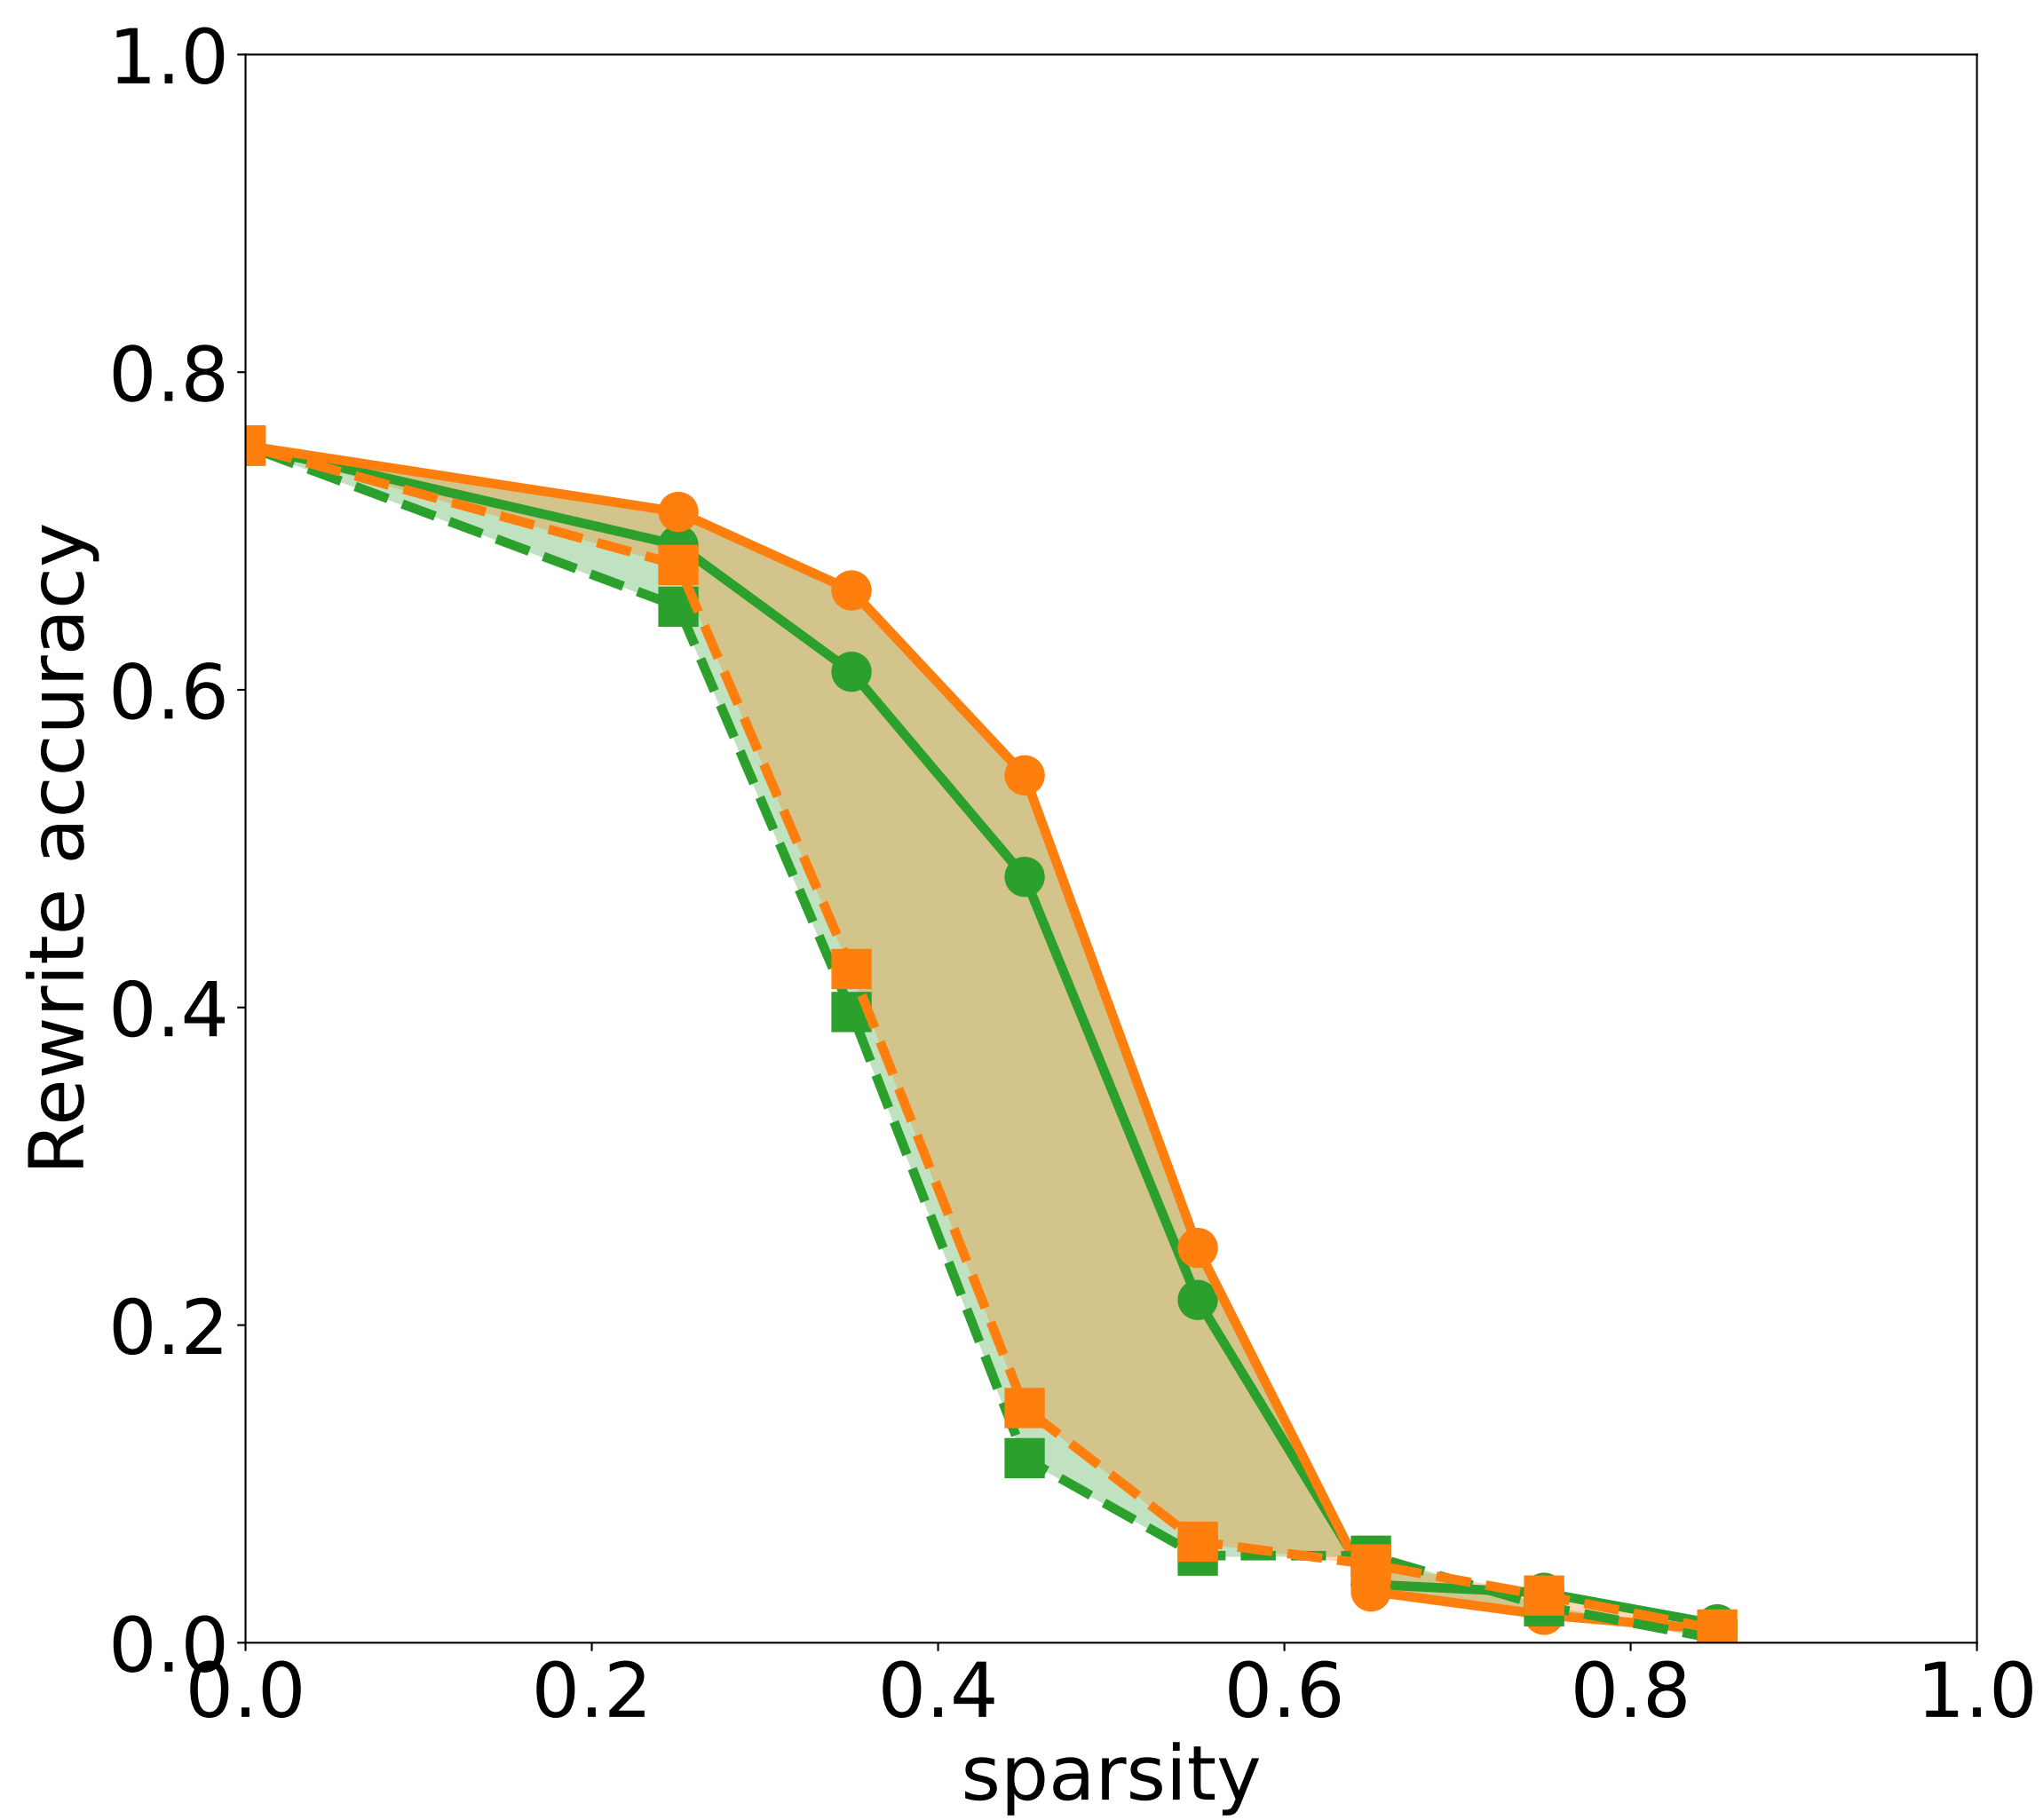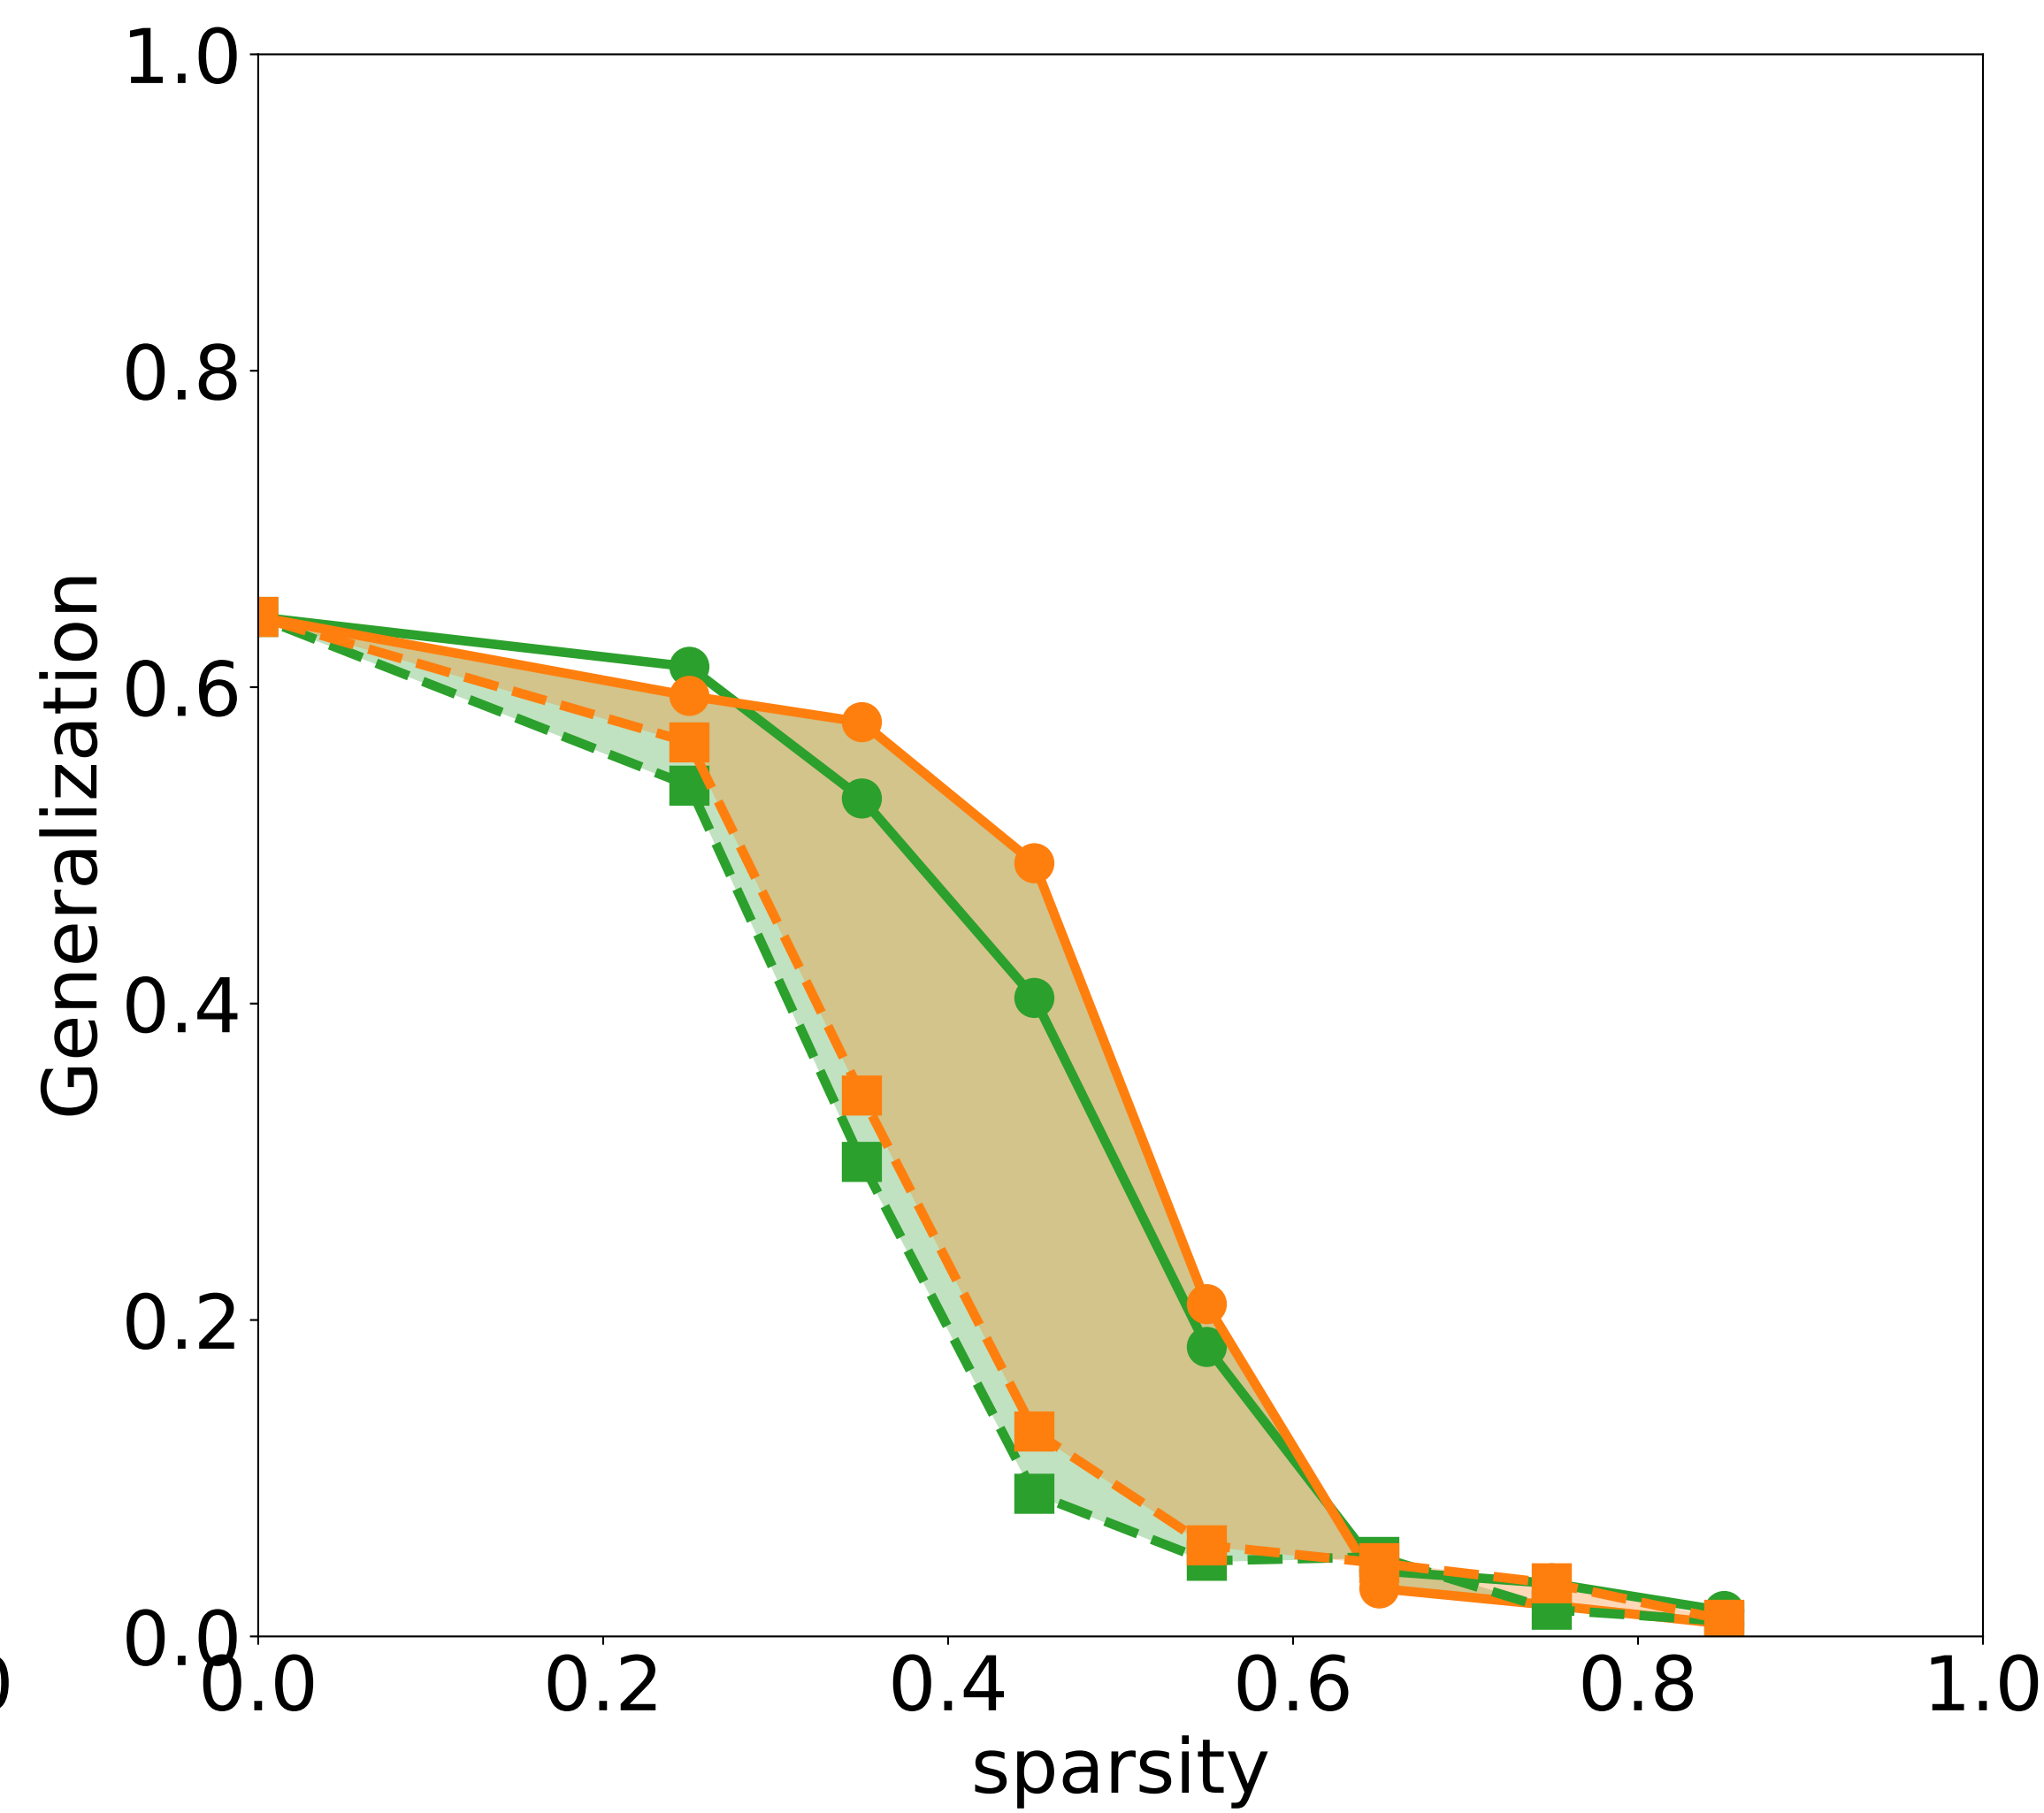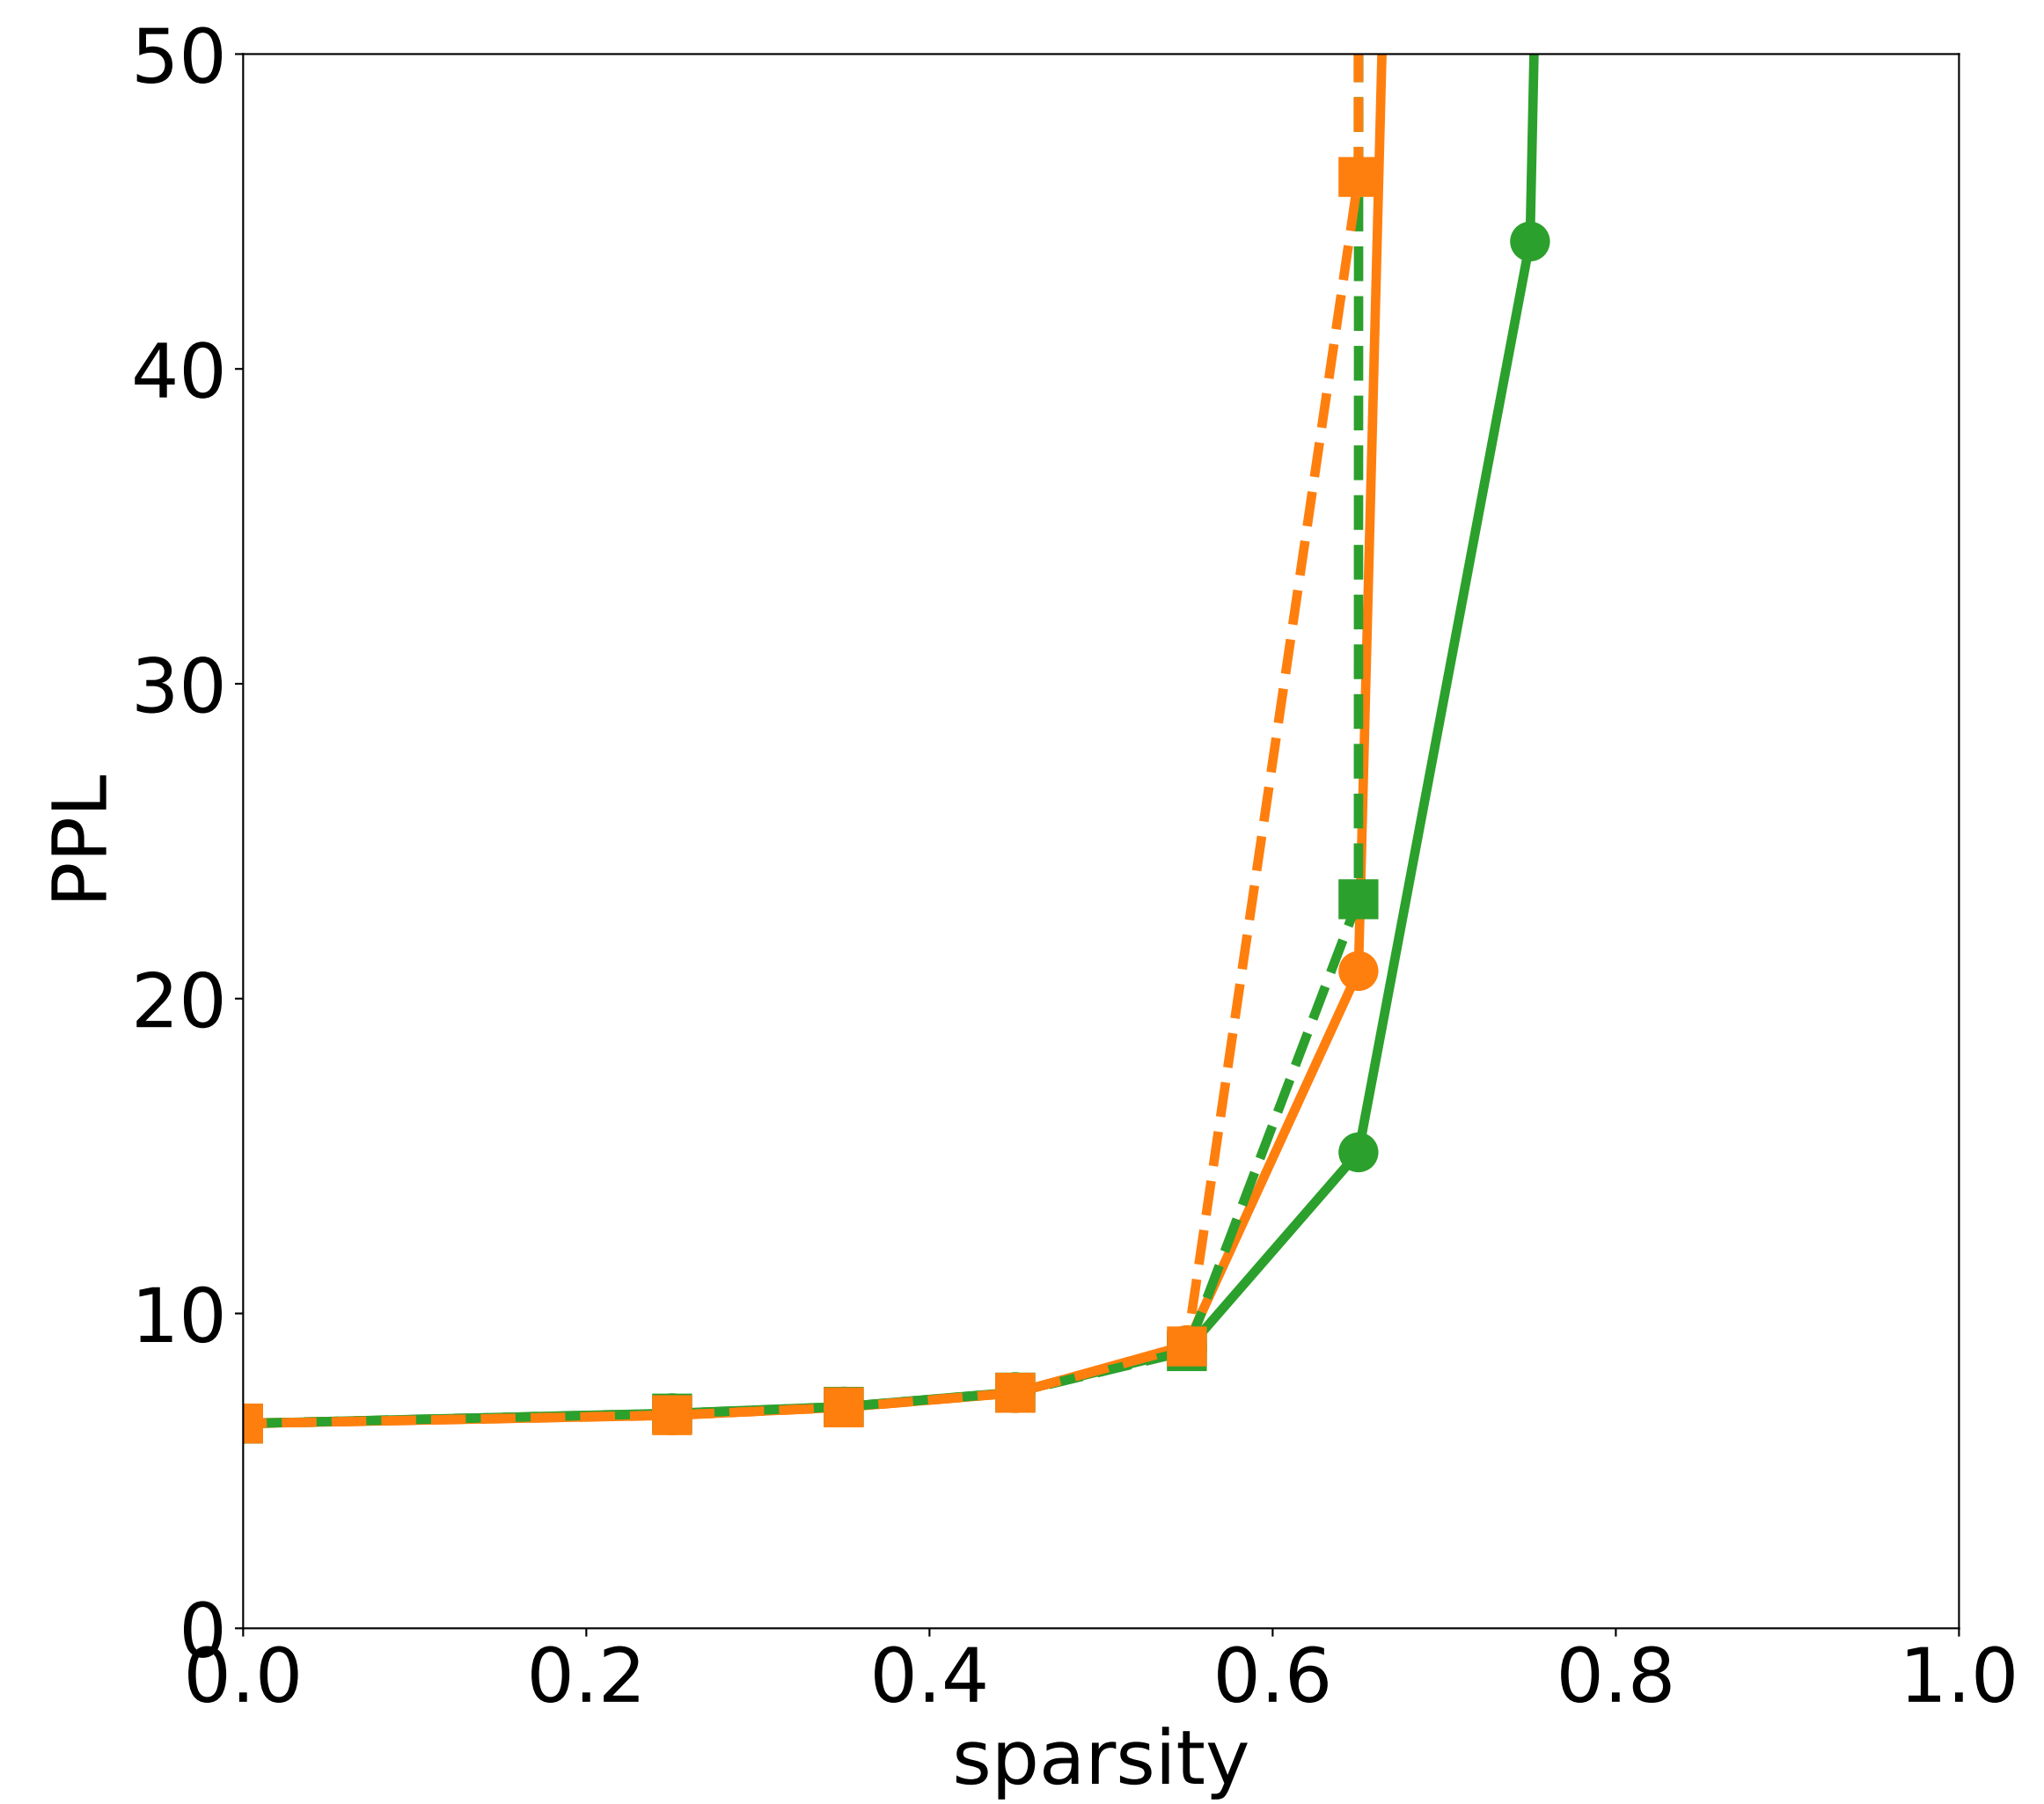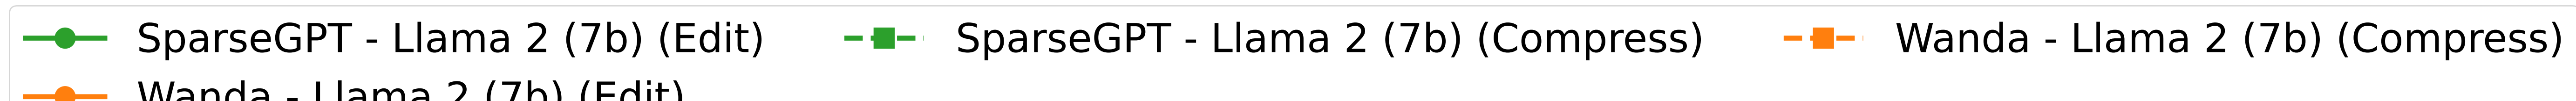

Supplement: supplementary_material [file attachment]

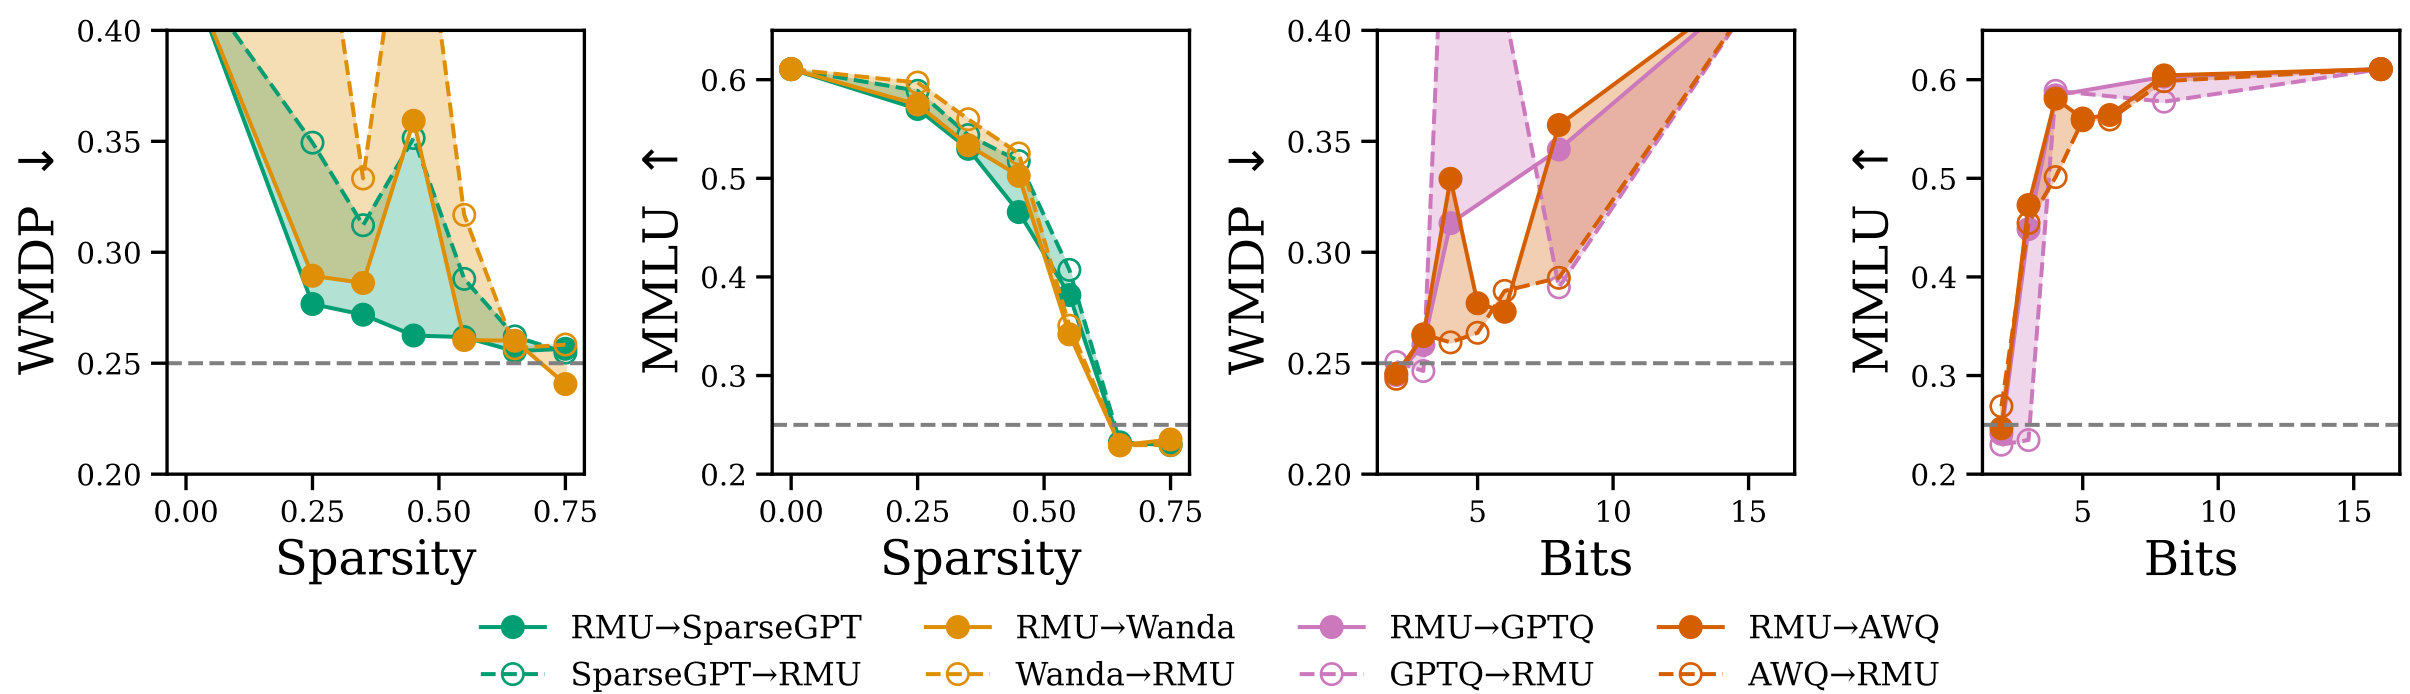

Supplement: supplementary_material [file attachment]

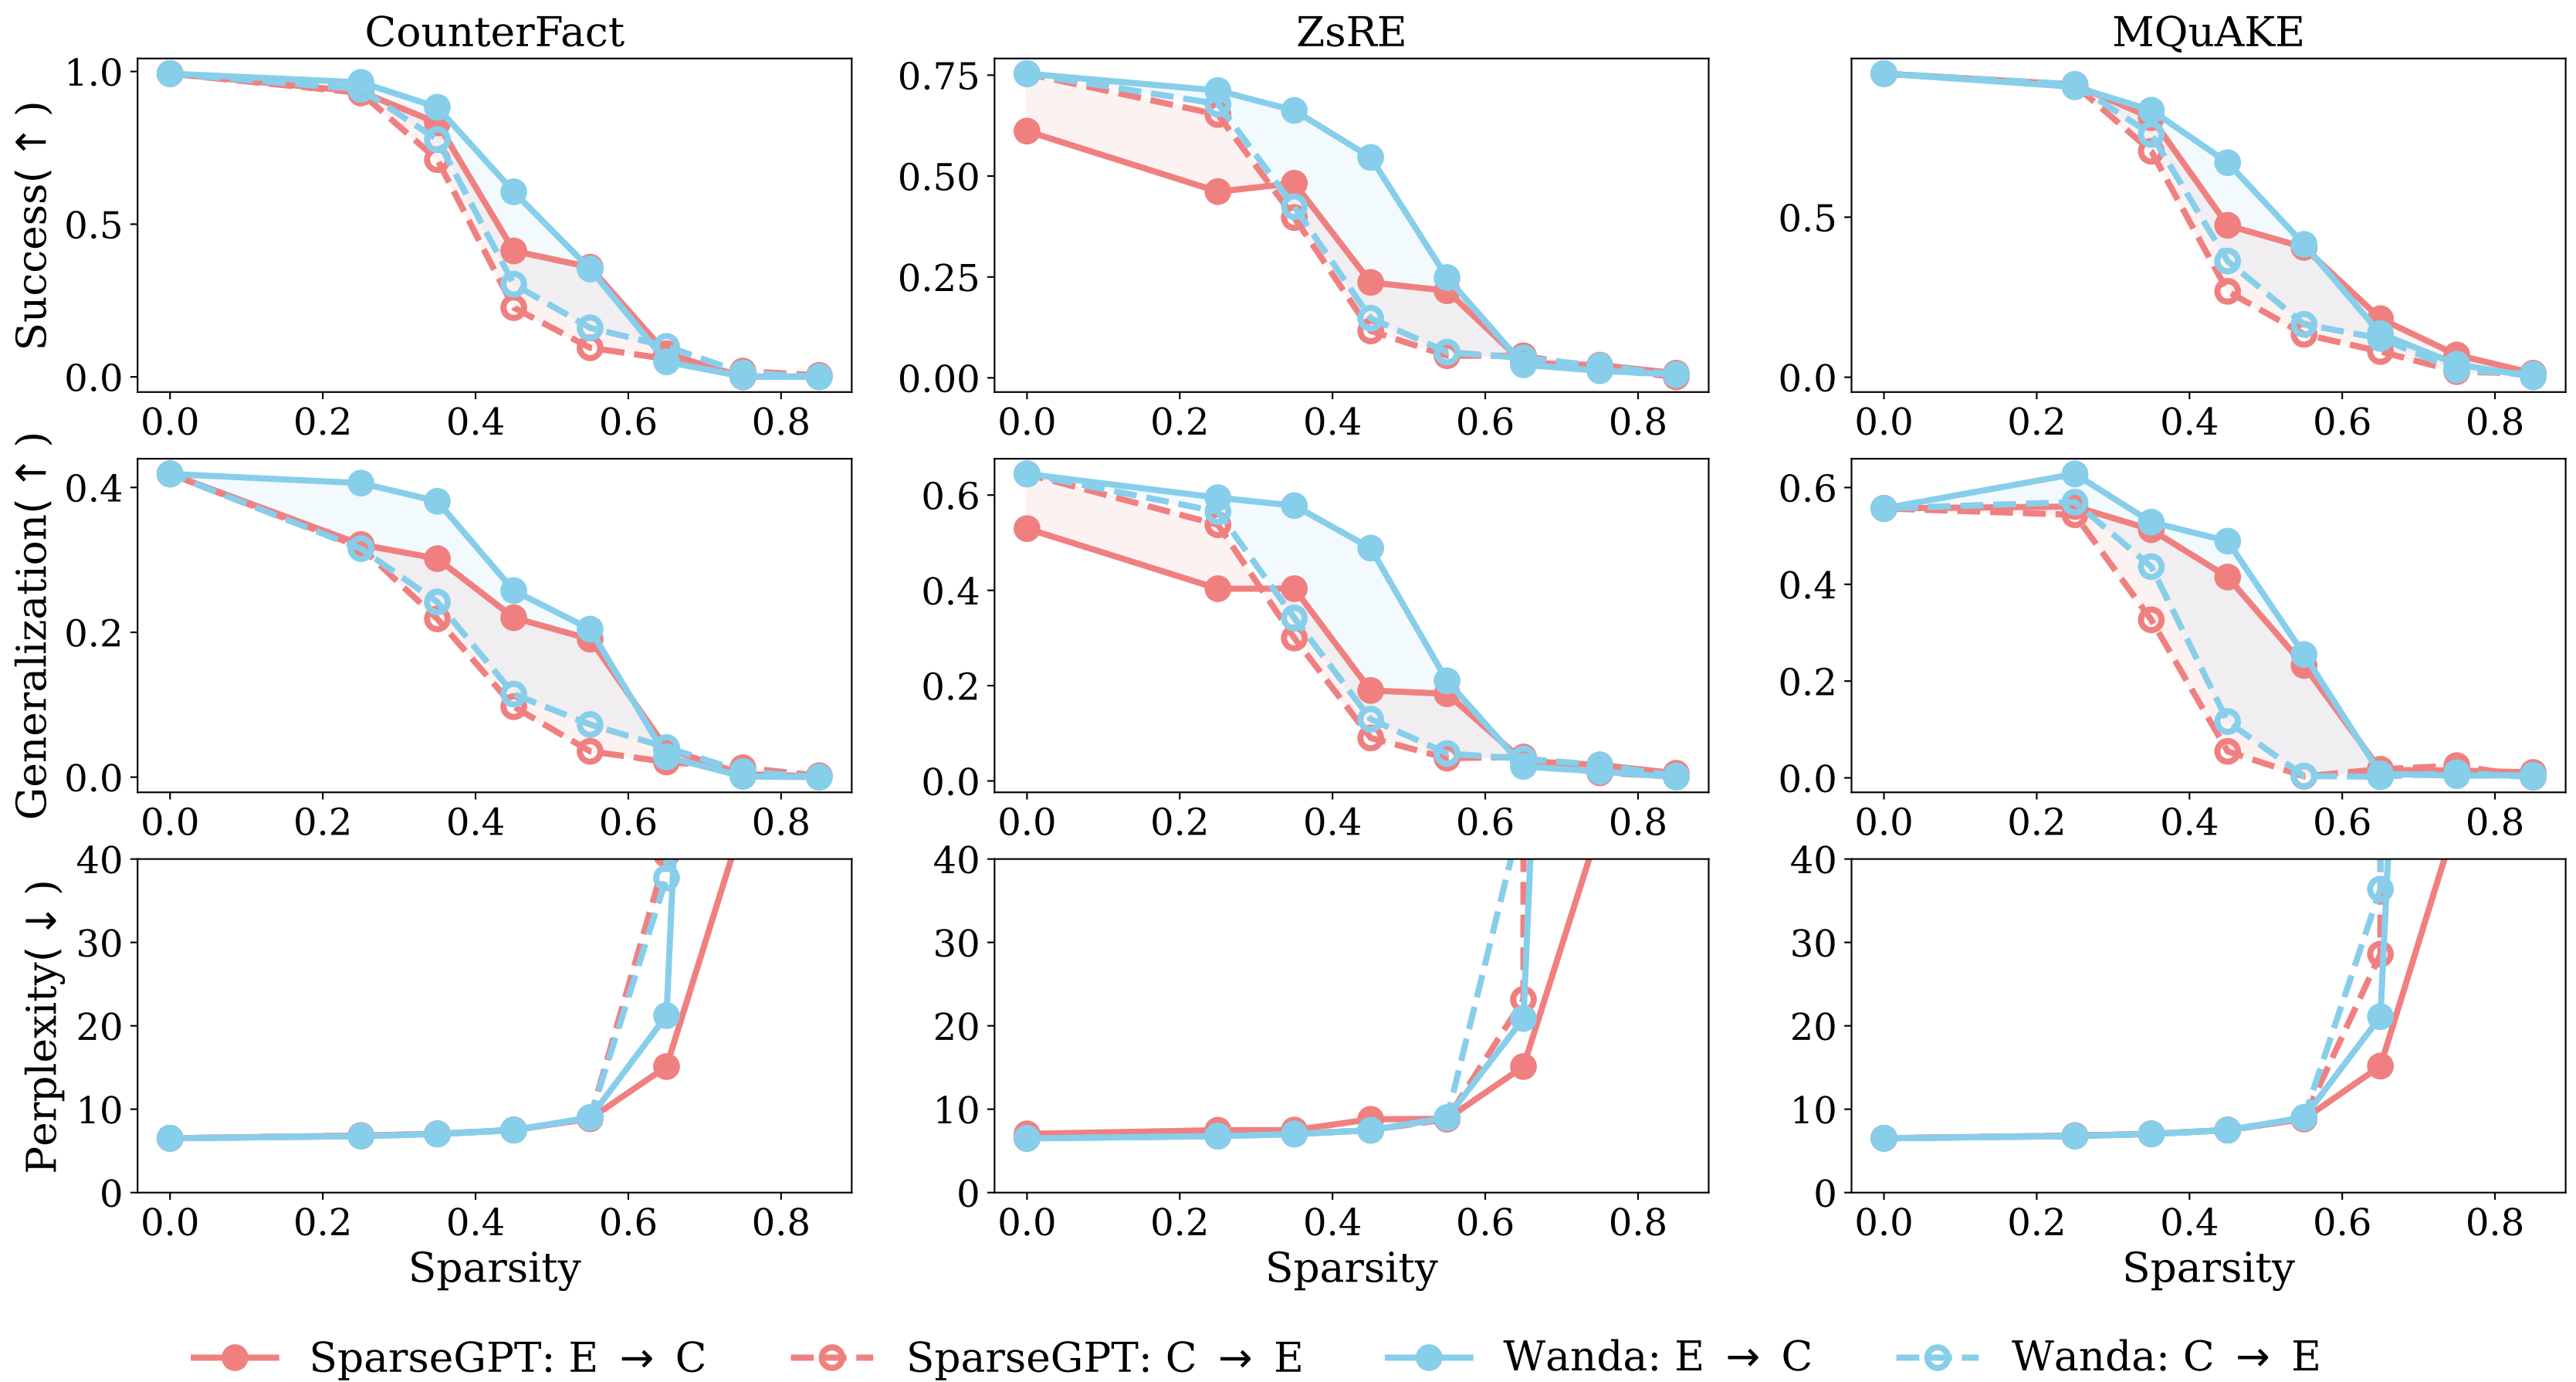

Supplement: supplementary_material [file attachment]

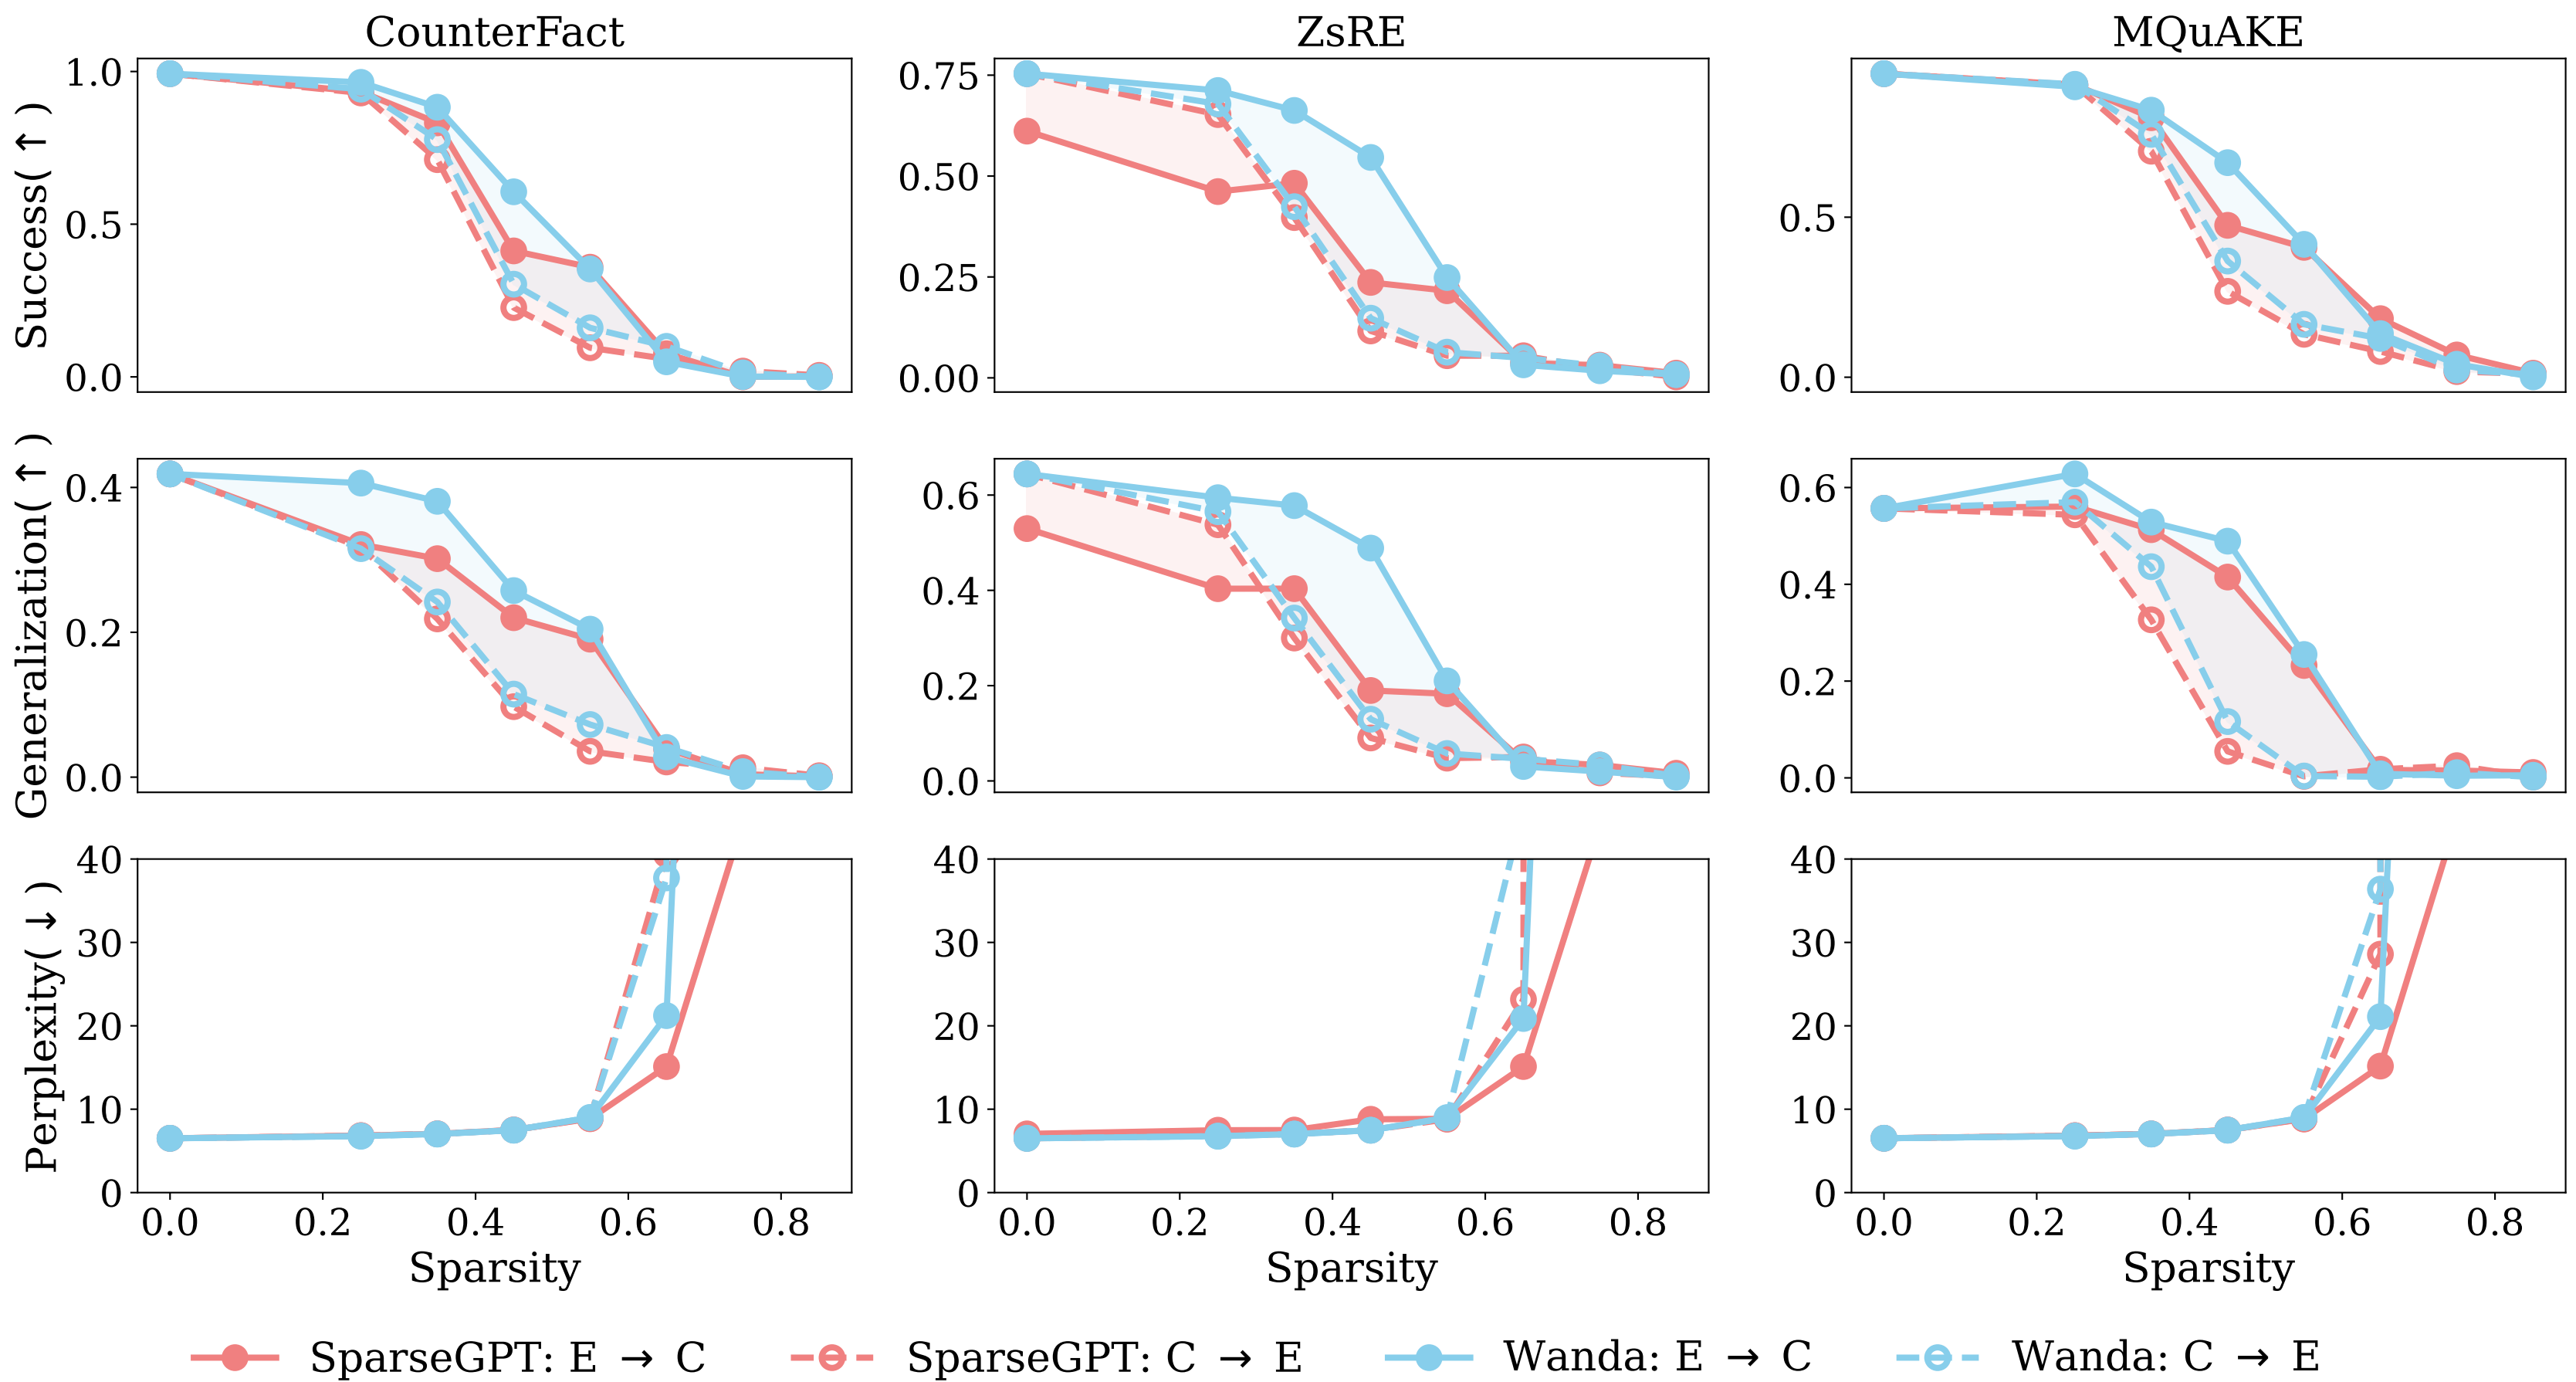

Supplement: supplementary_material [file attachment]

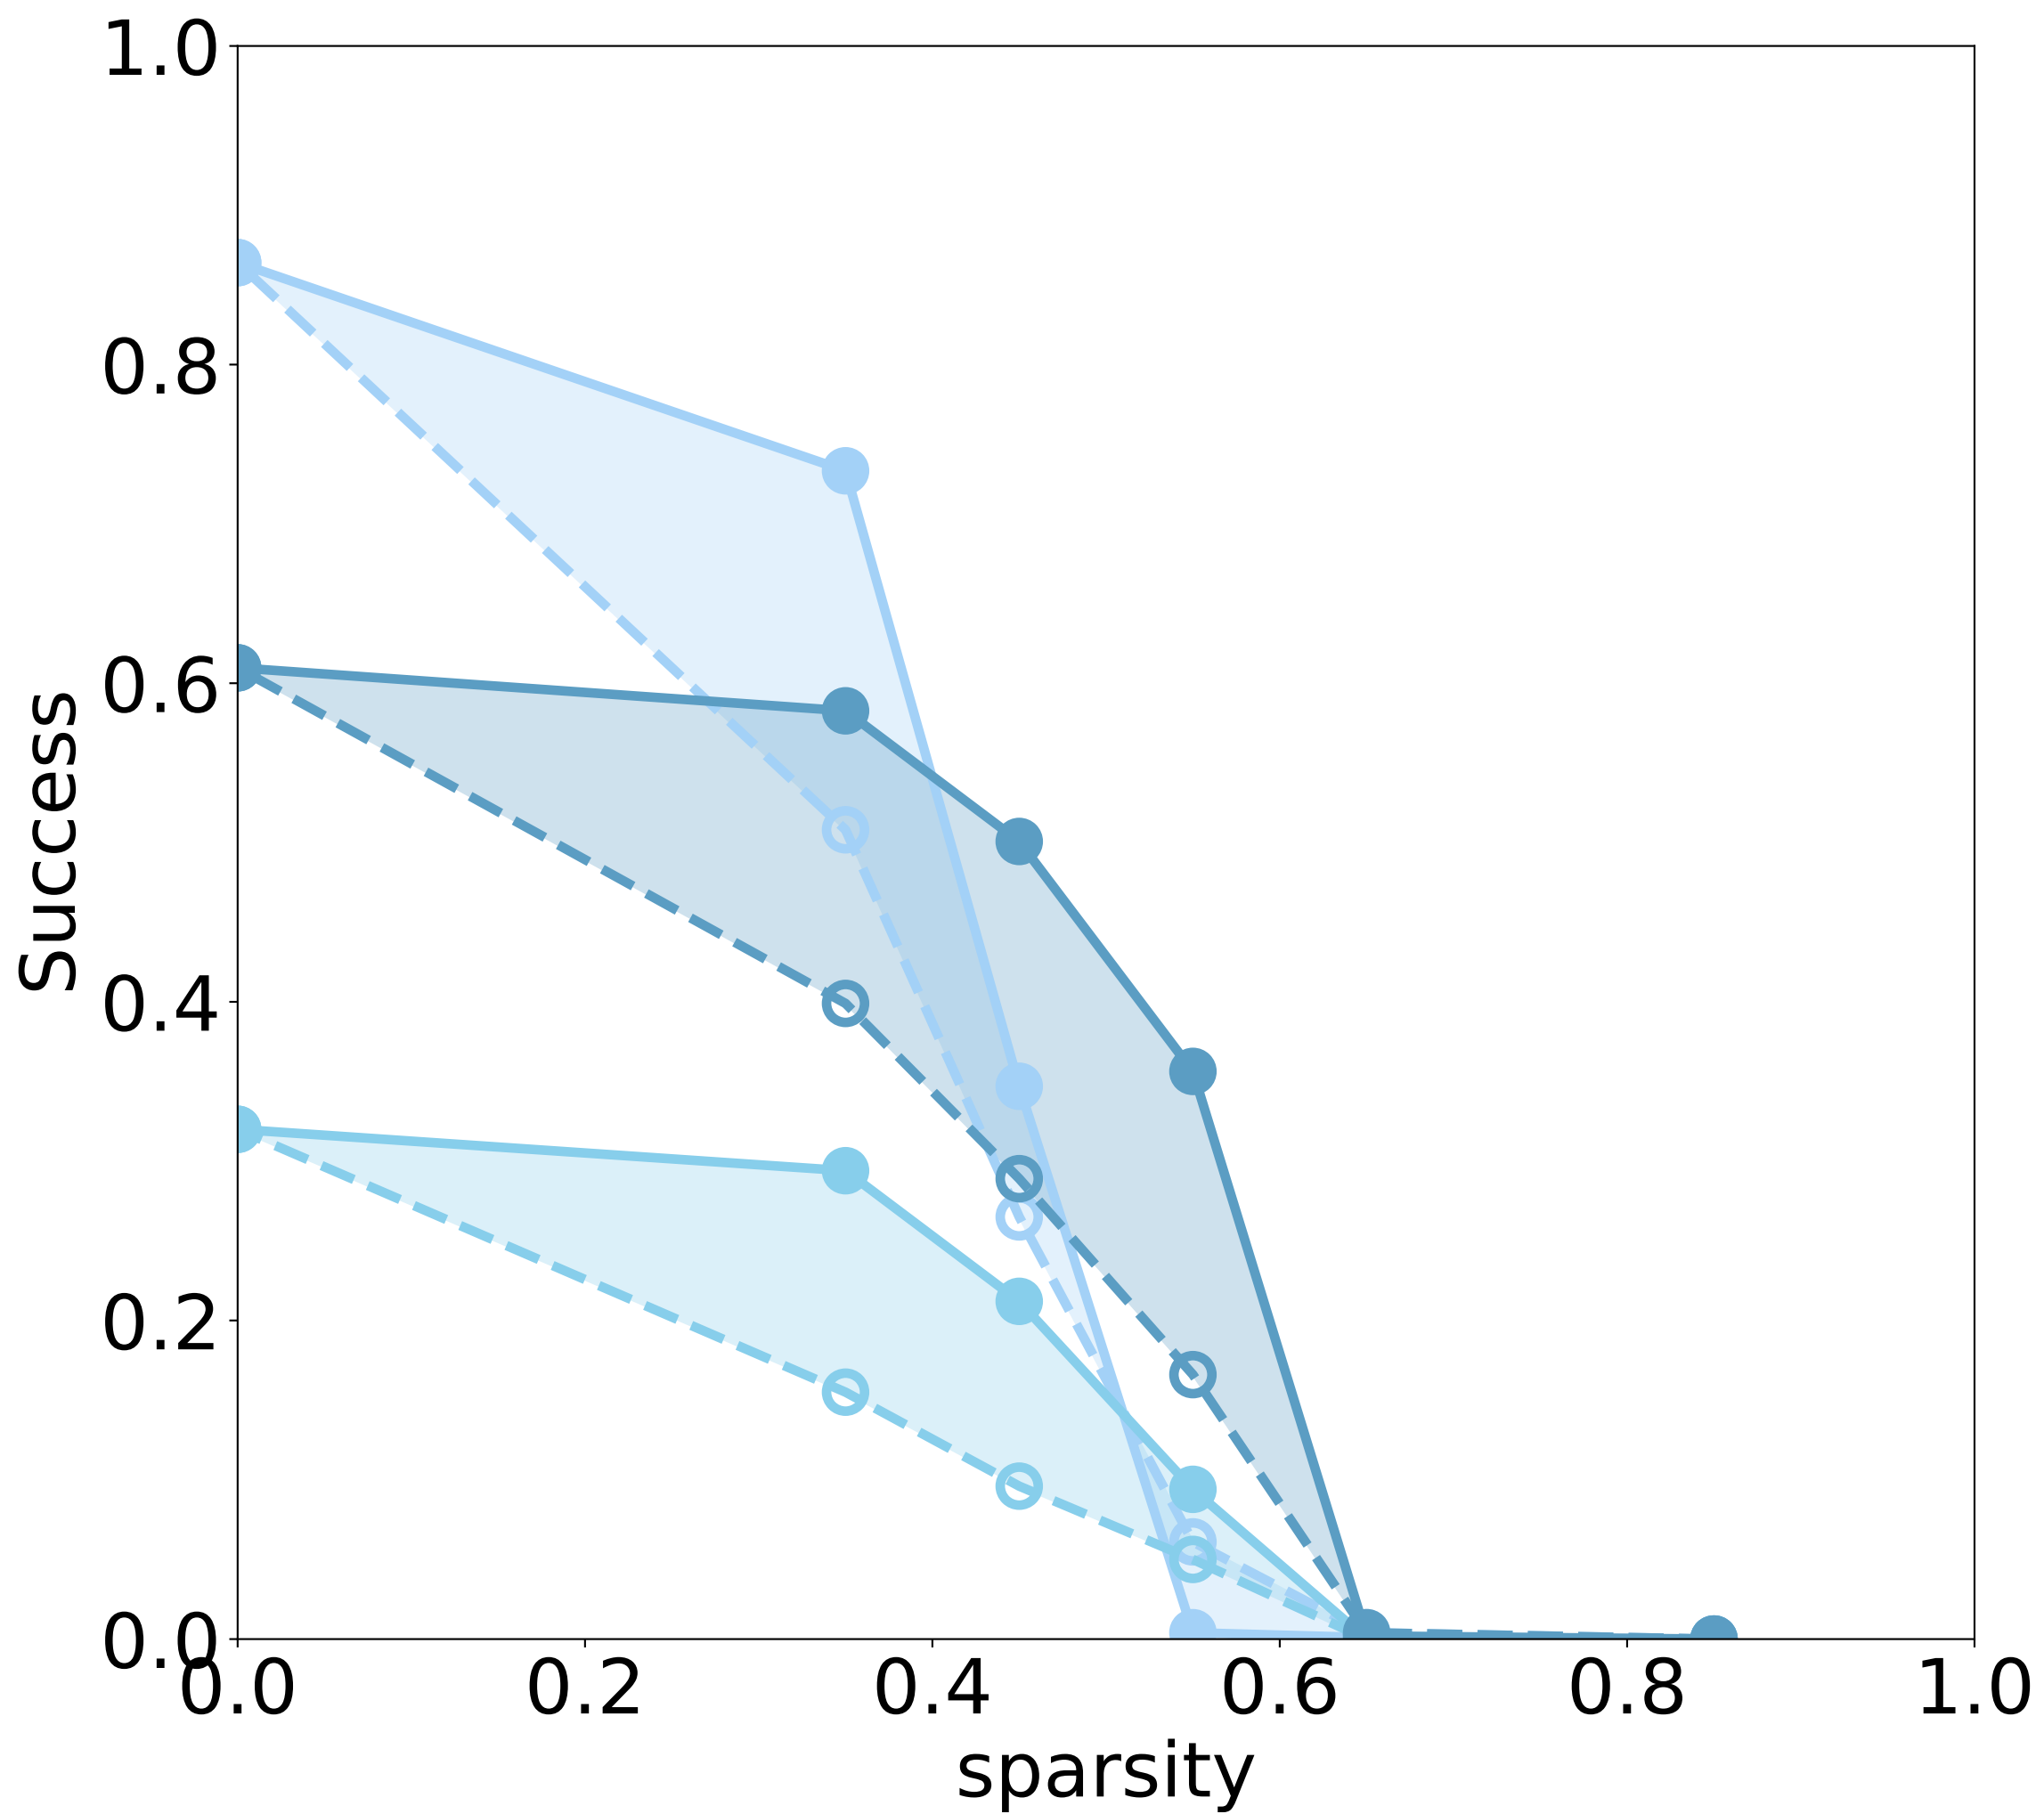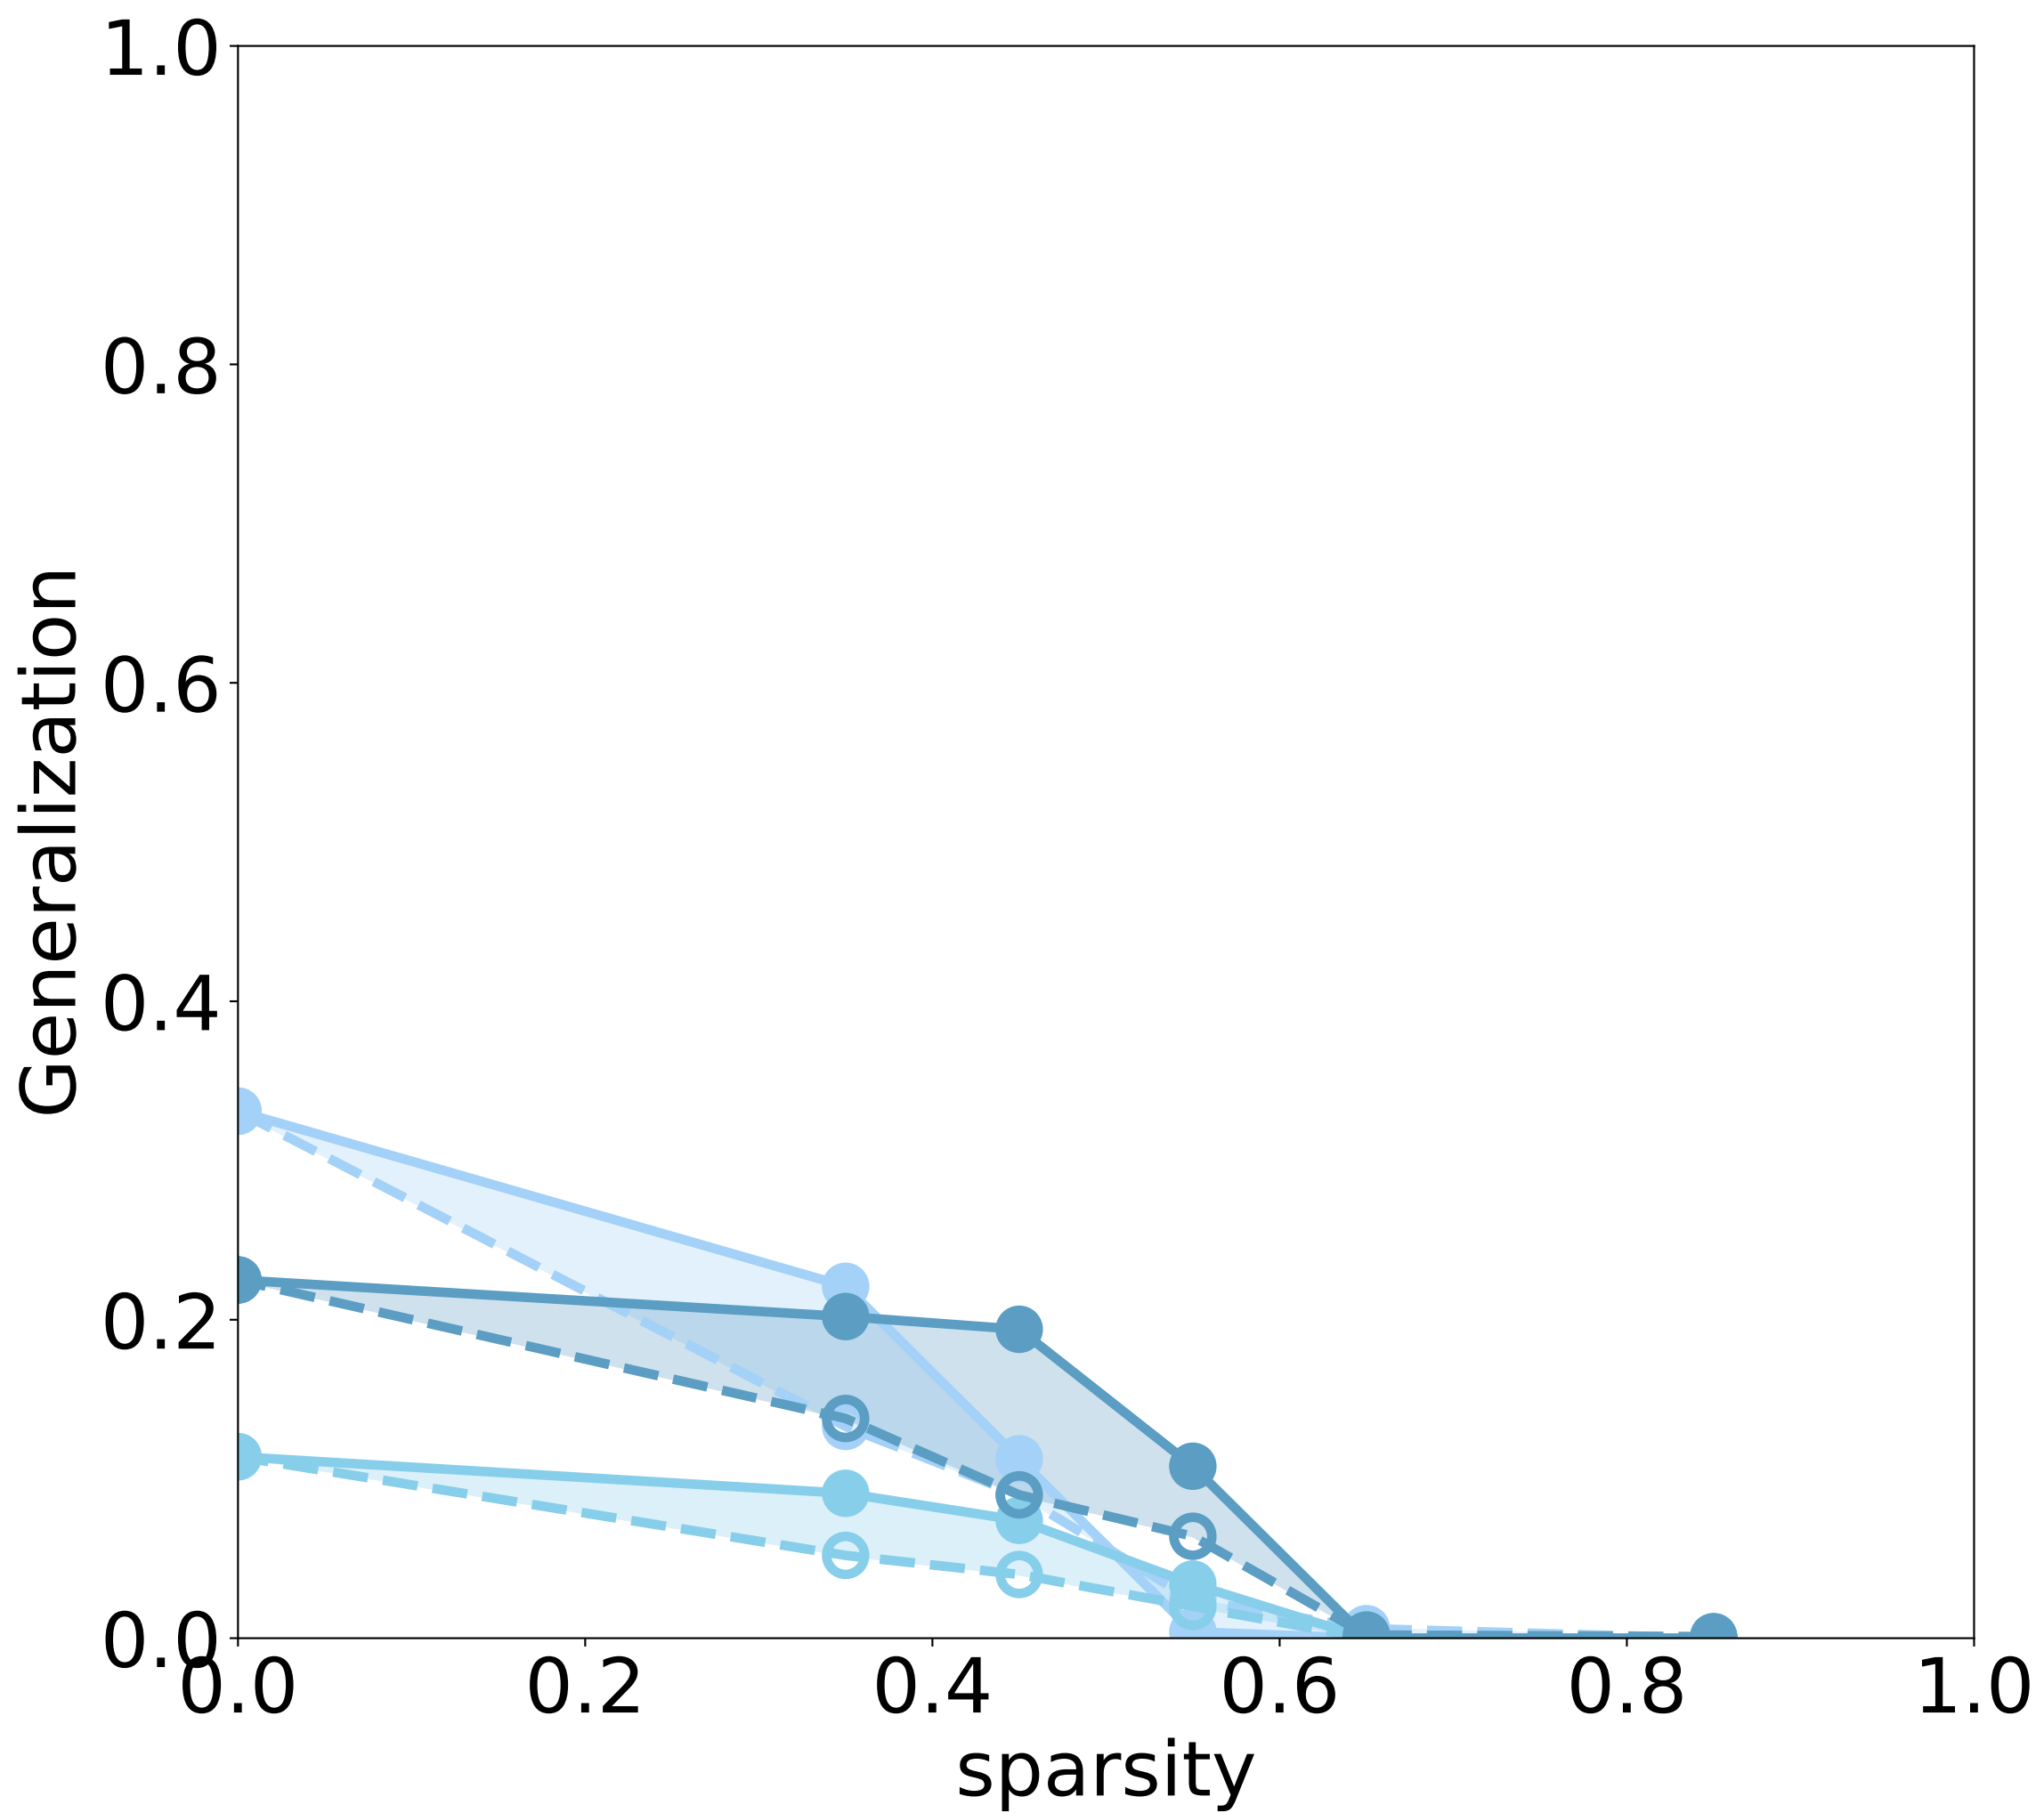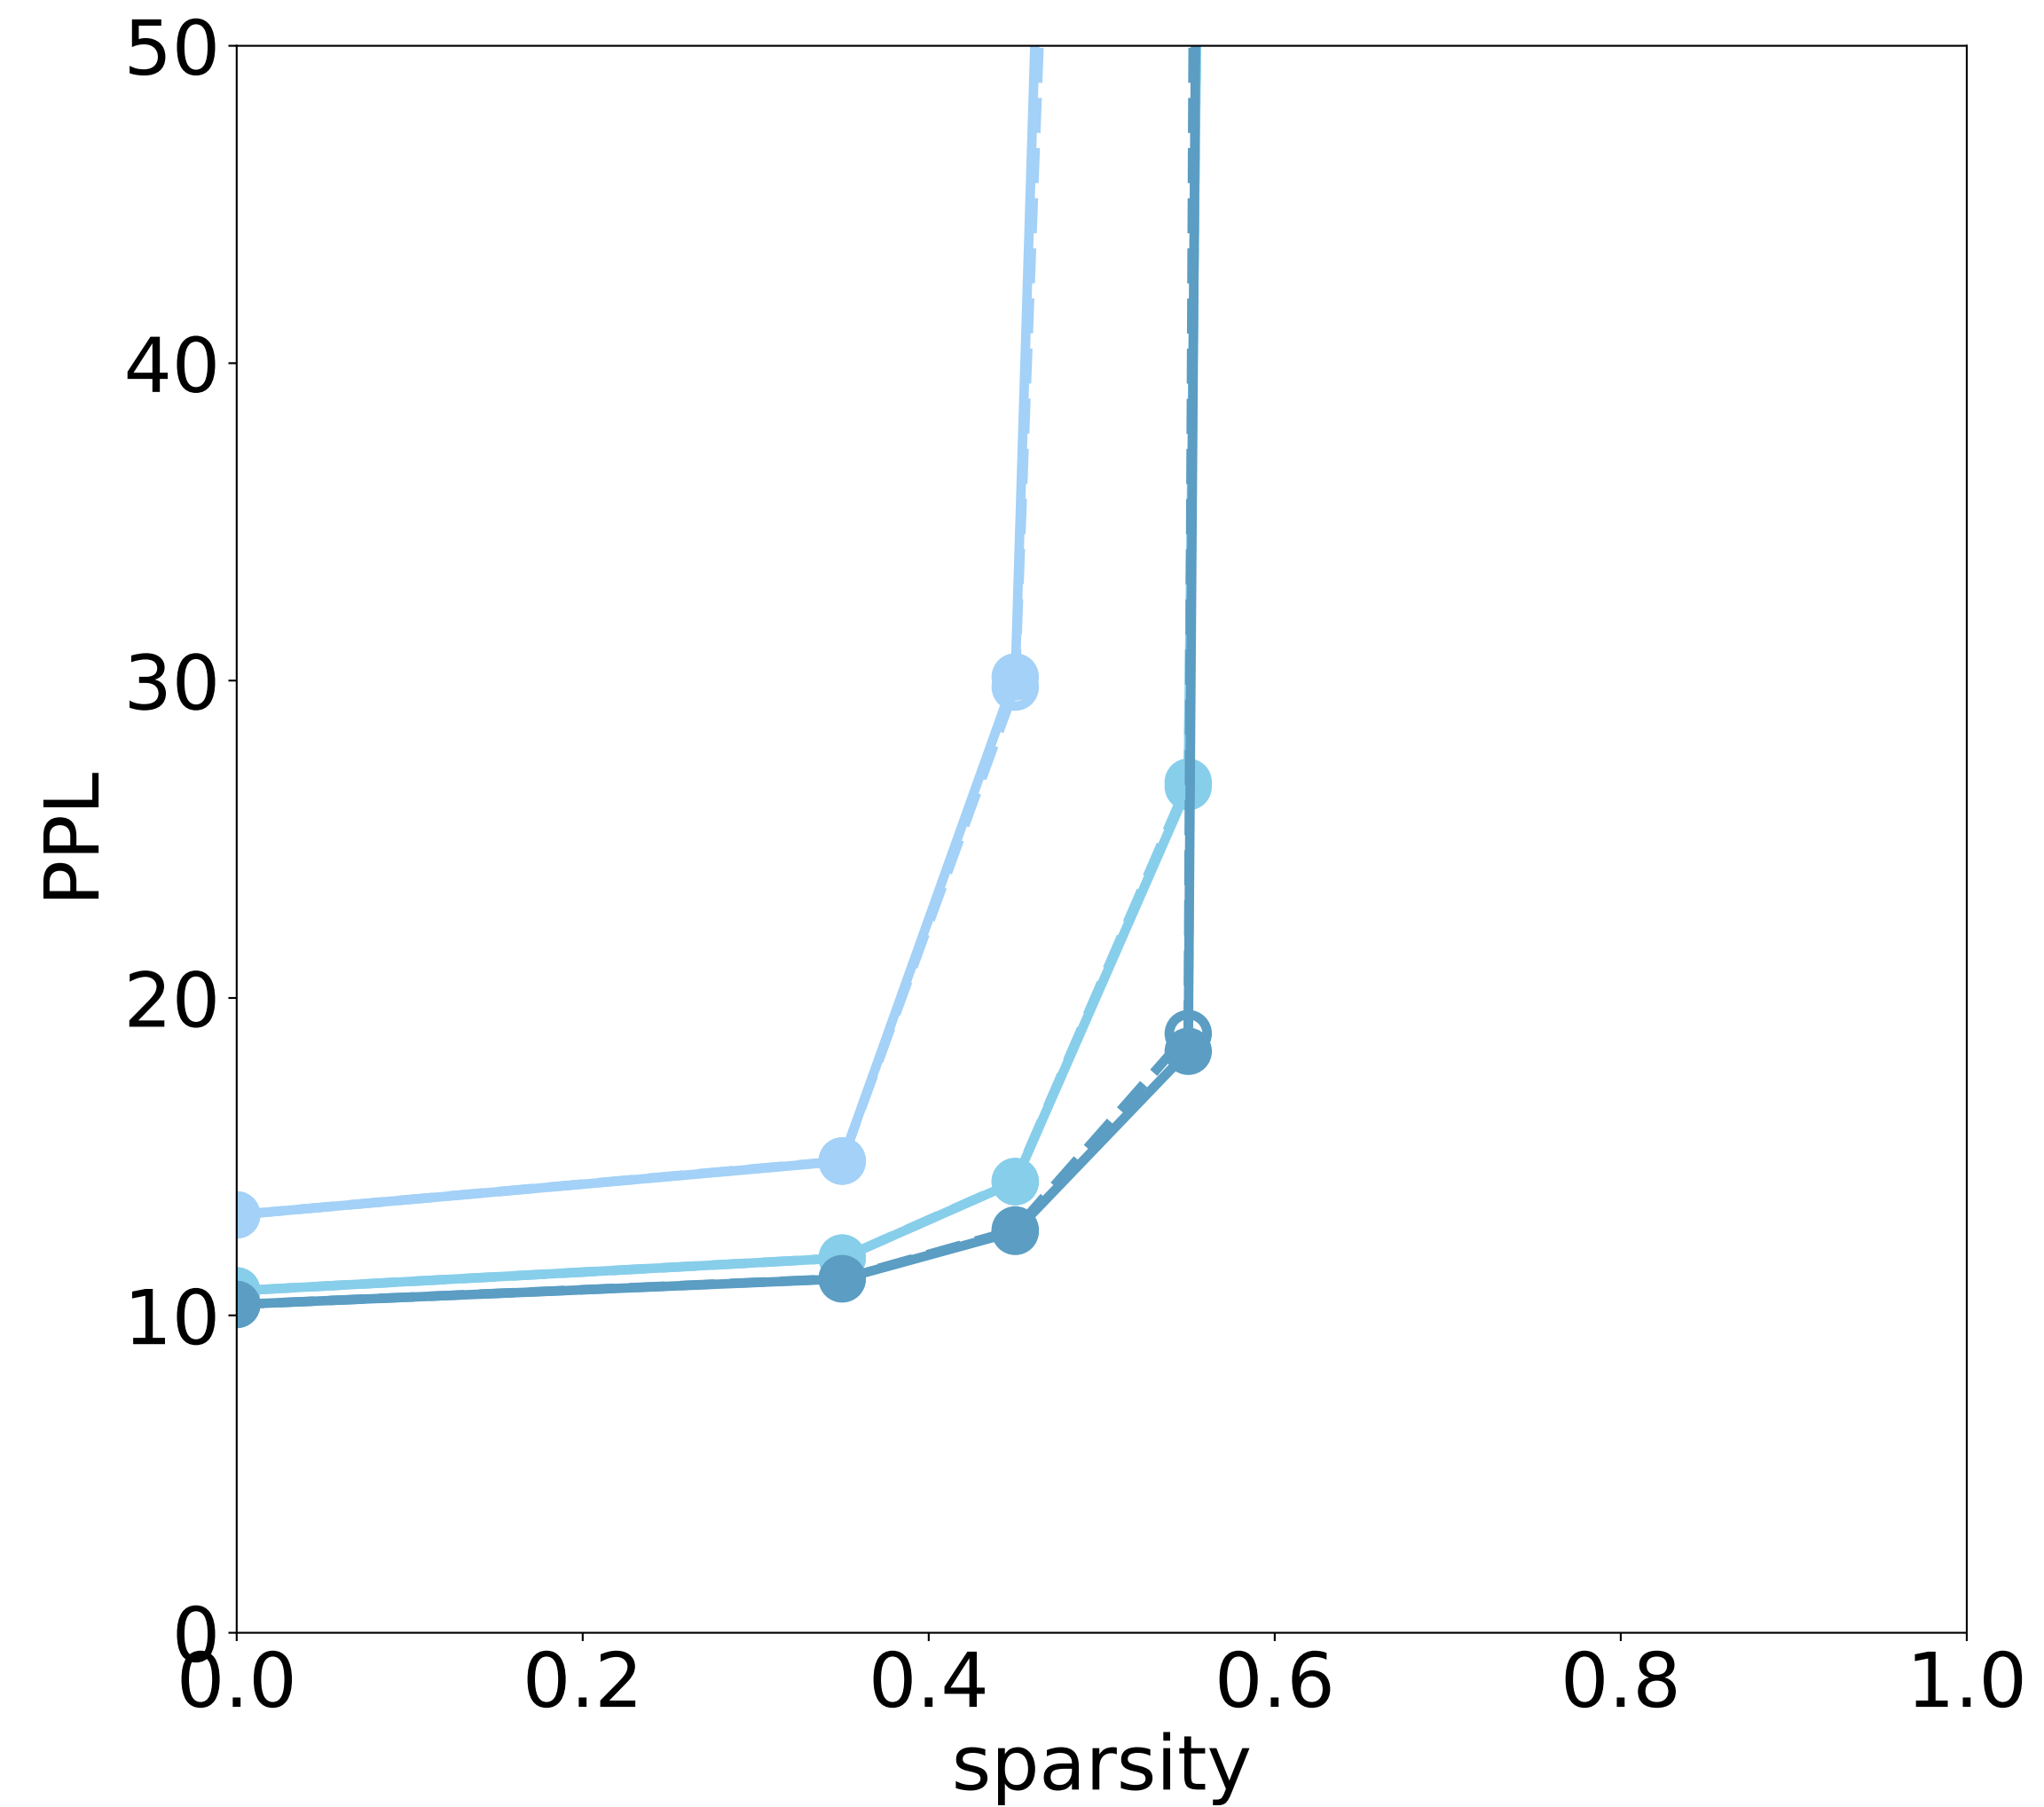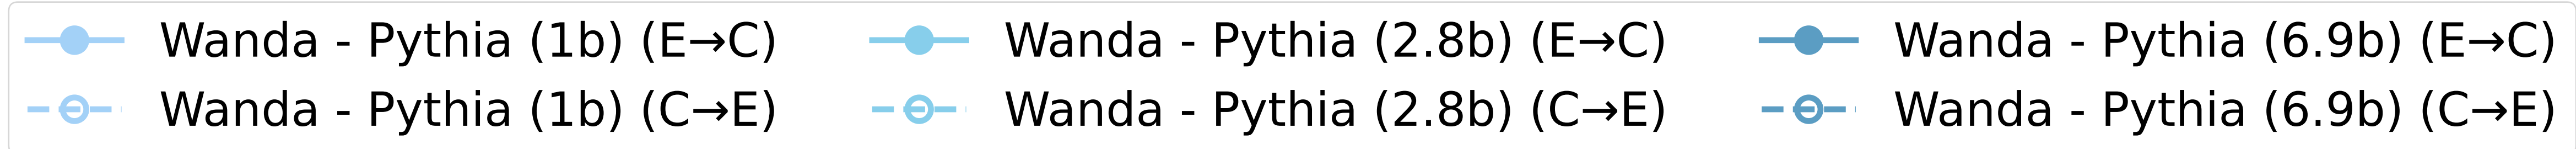

Supplement: supplementary_material [file attachment]

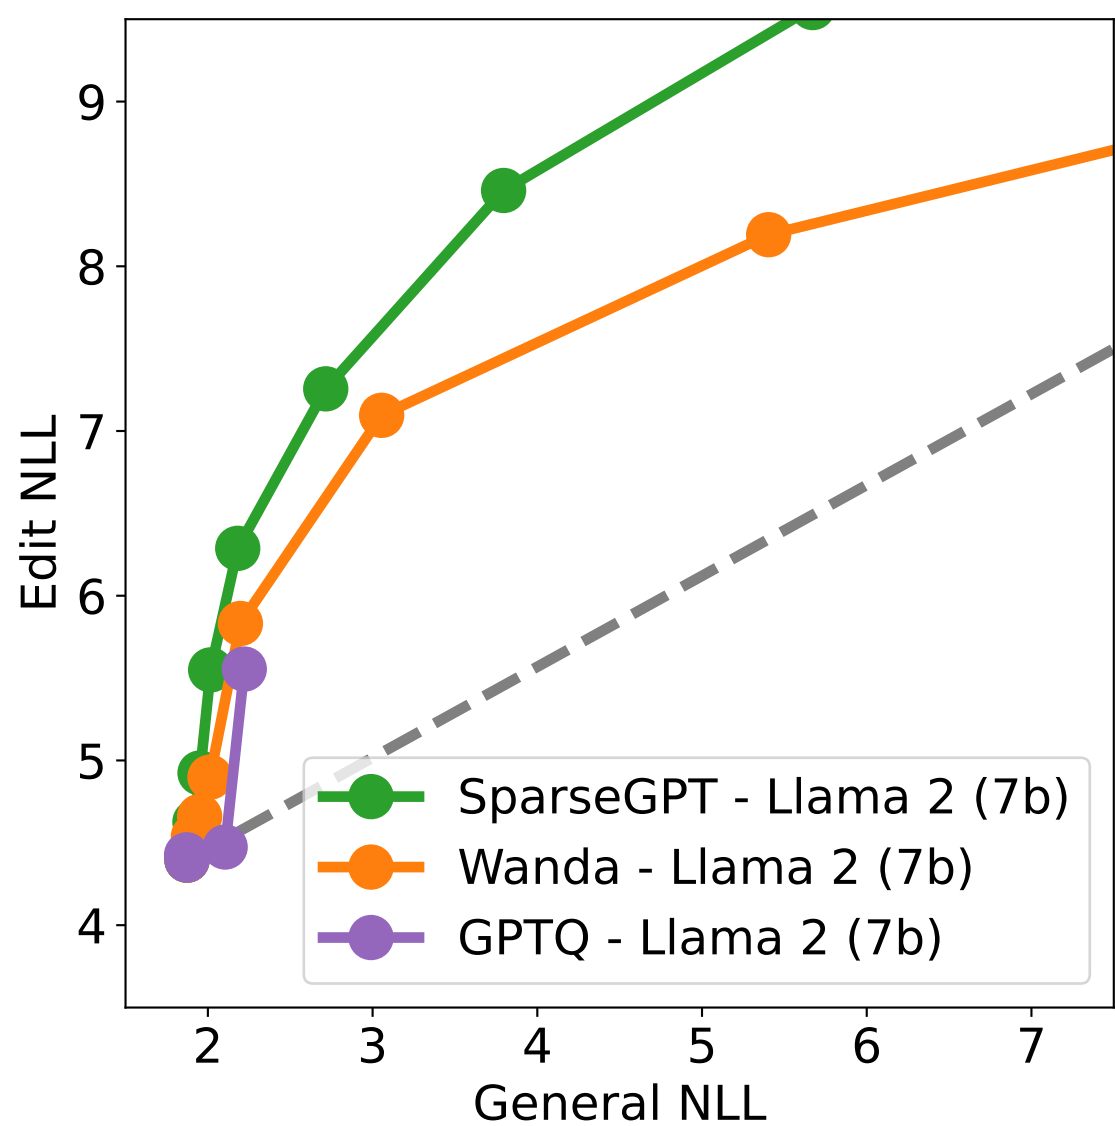

Supplement: supplementary_material [file attachment]

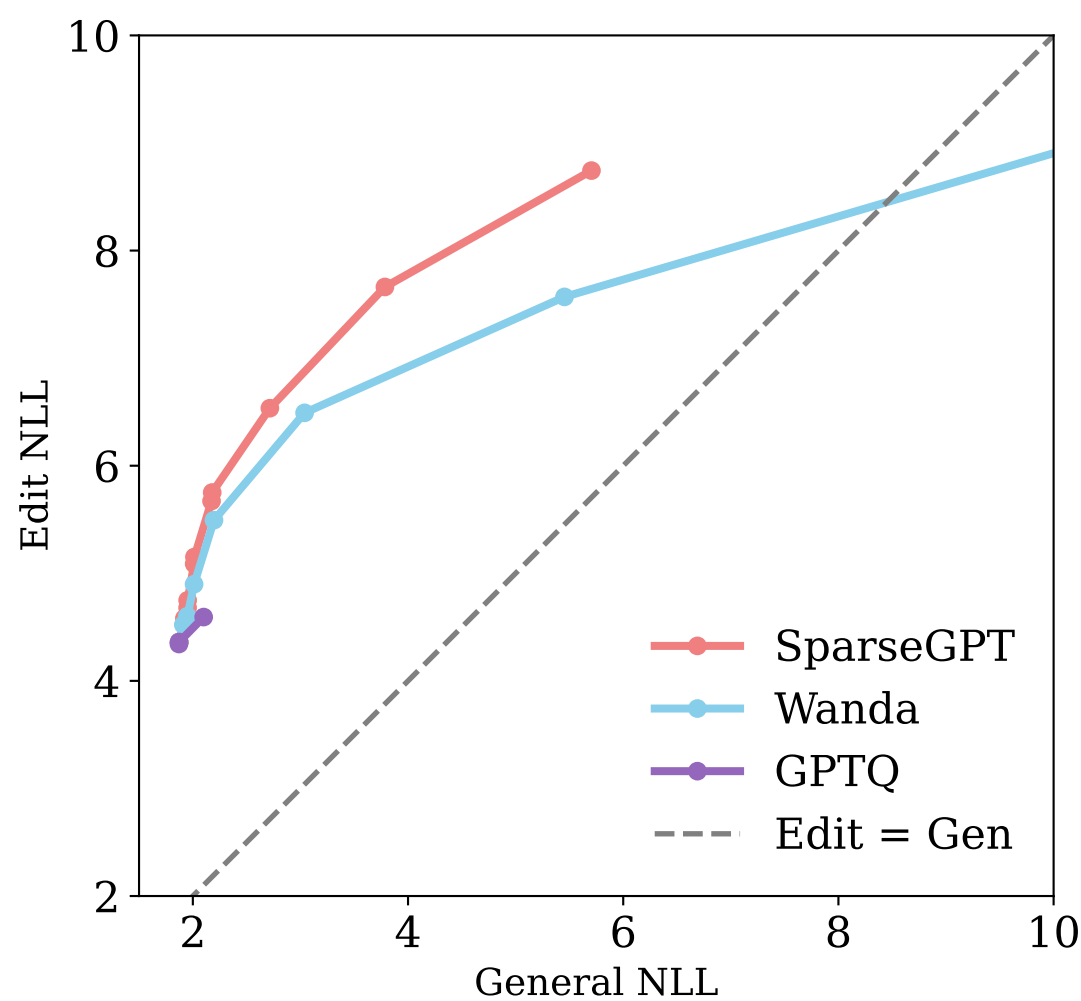

Supplement: supplementary_material [file attachment]

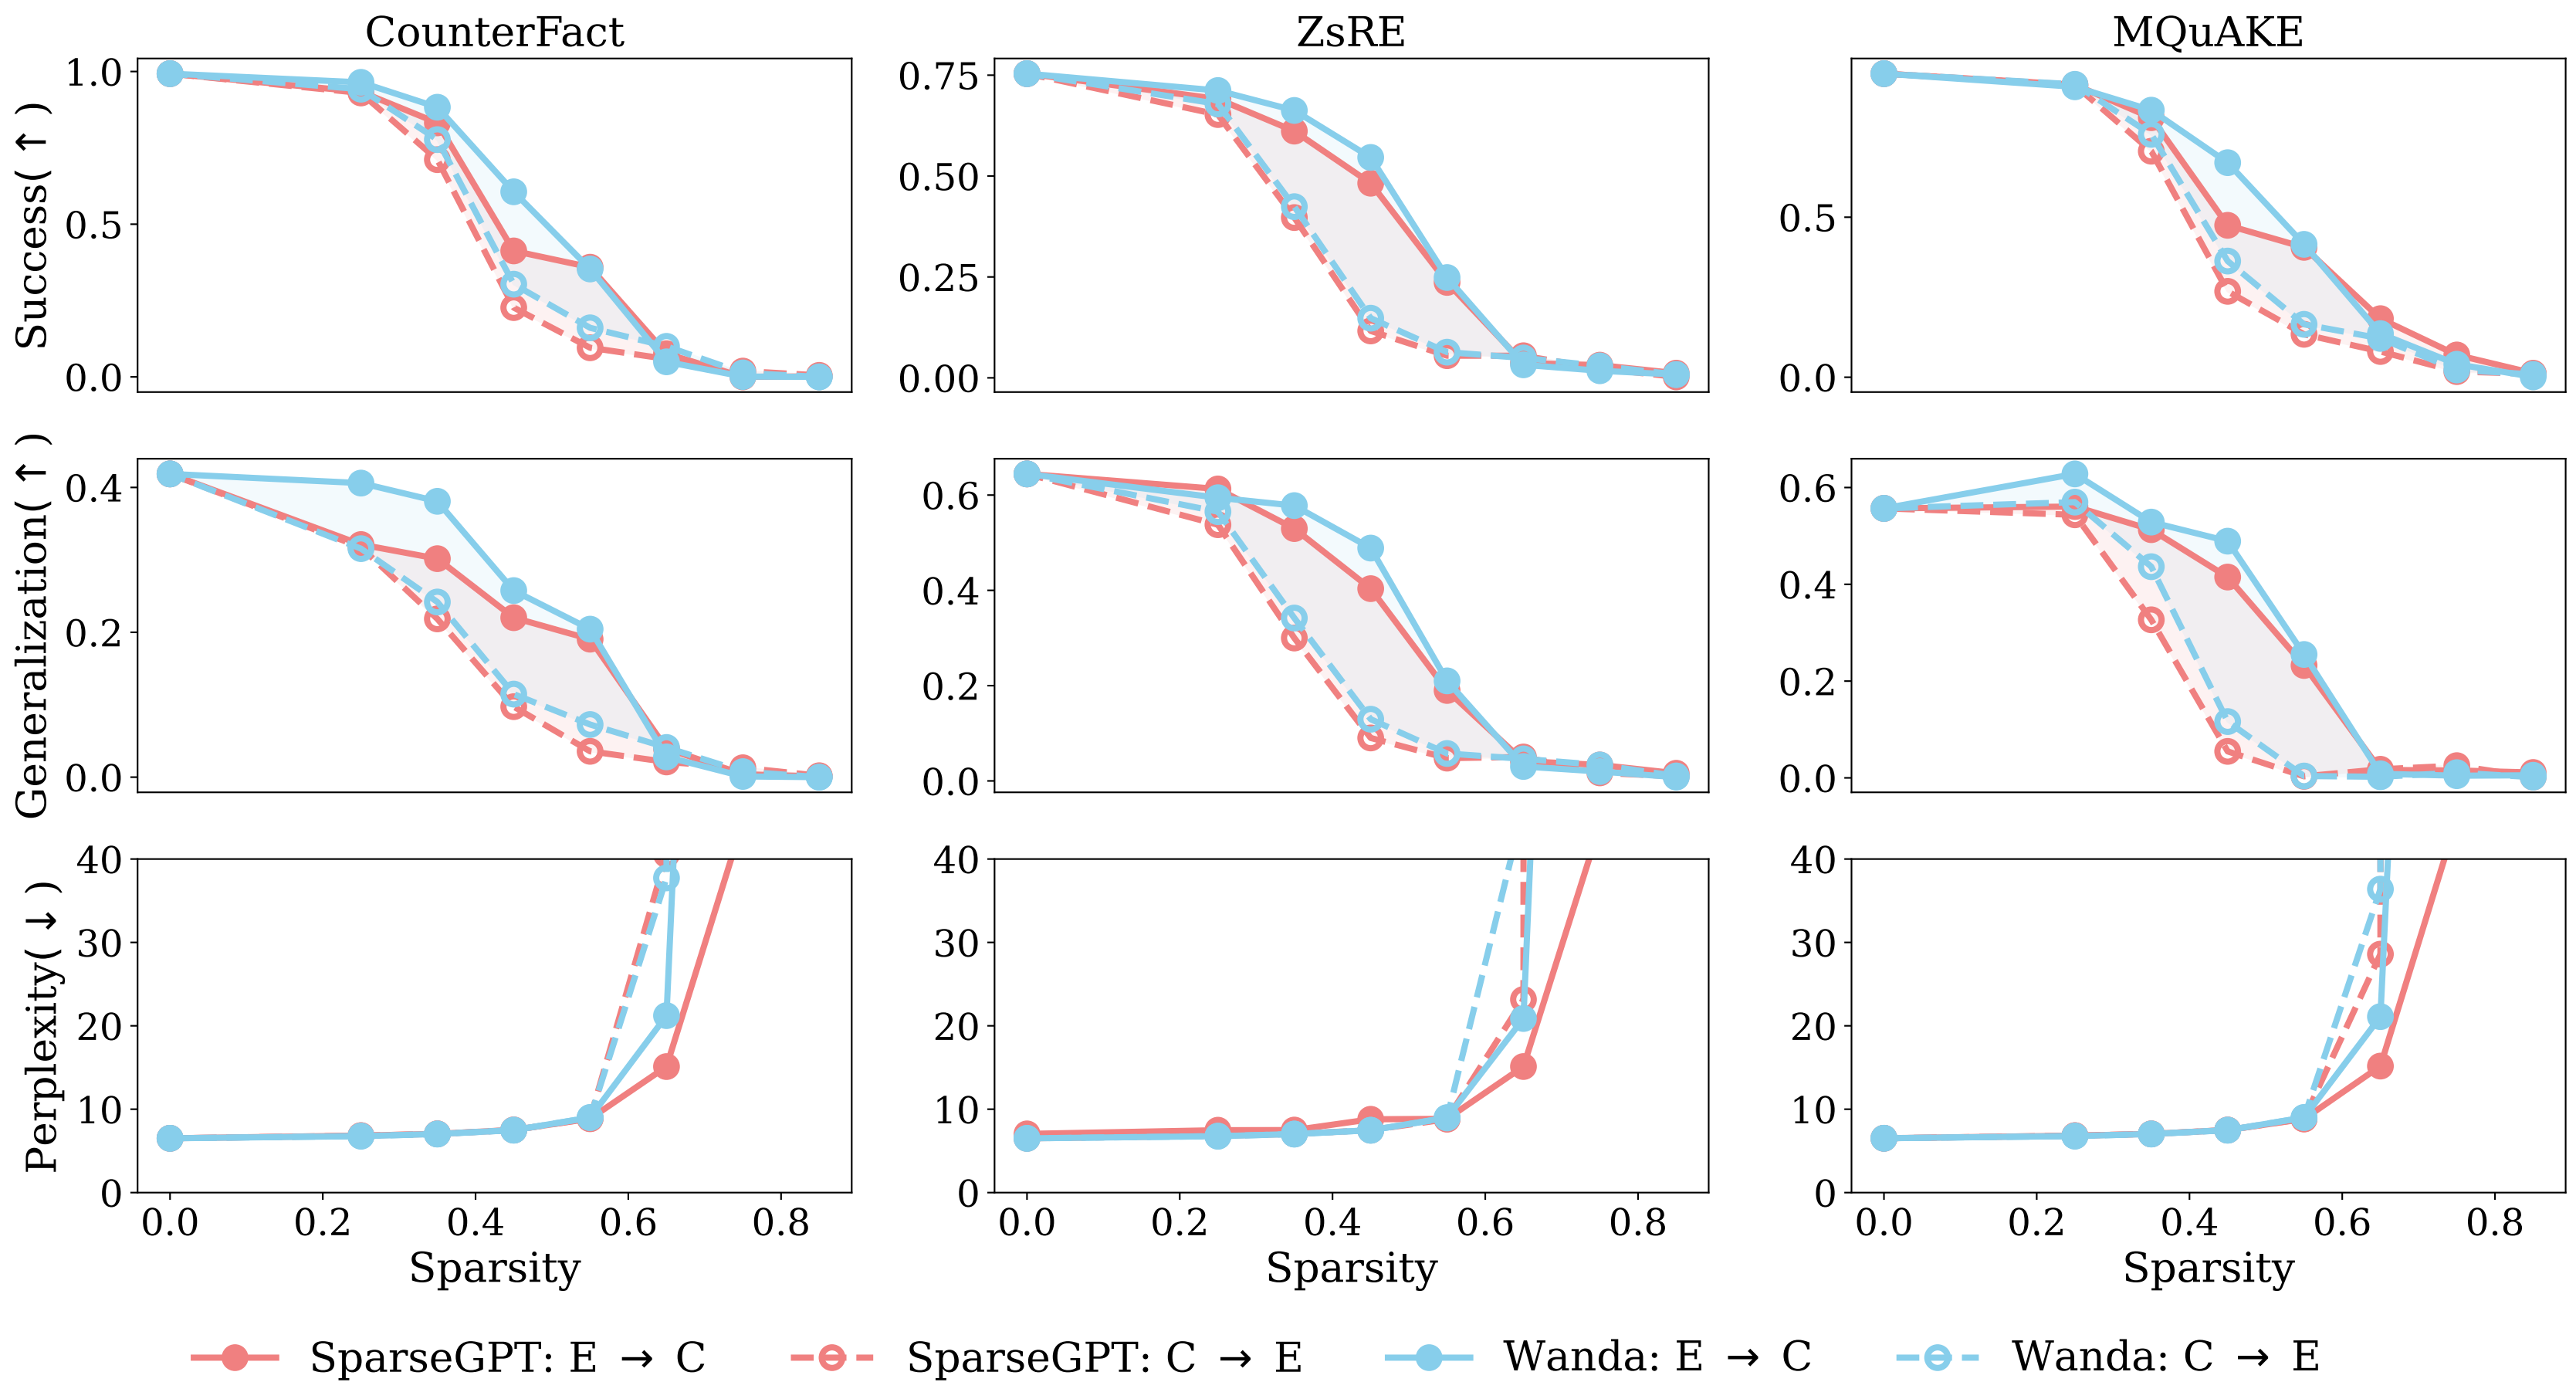

Supplement: supplementary_material [file attachment]

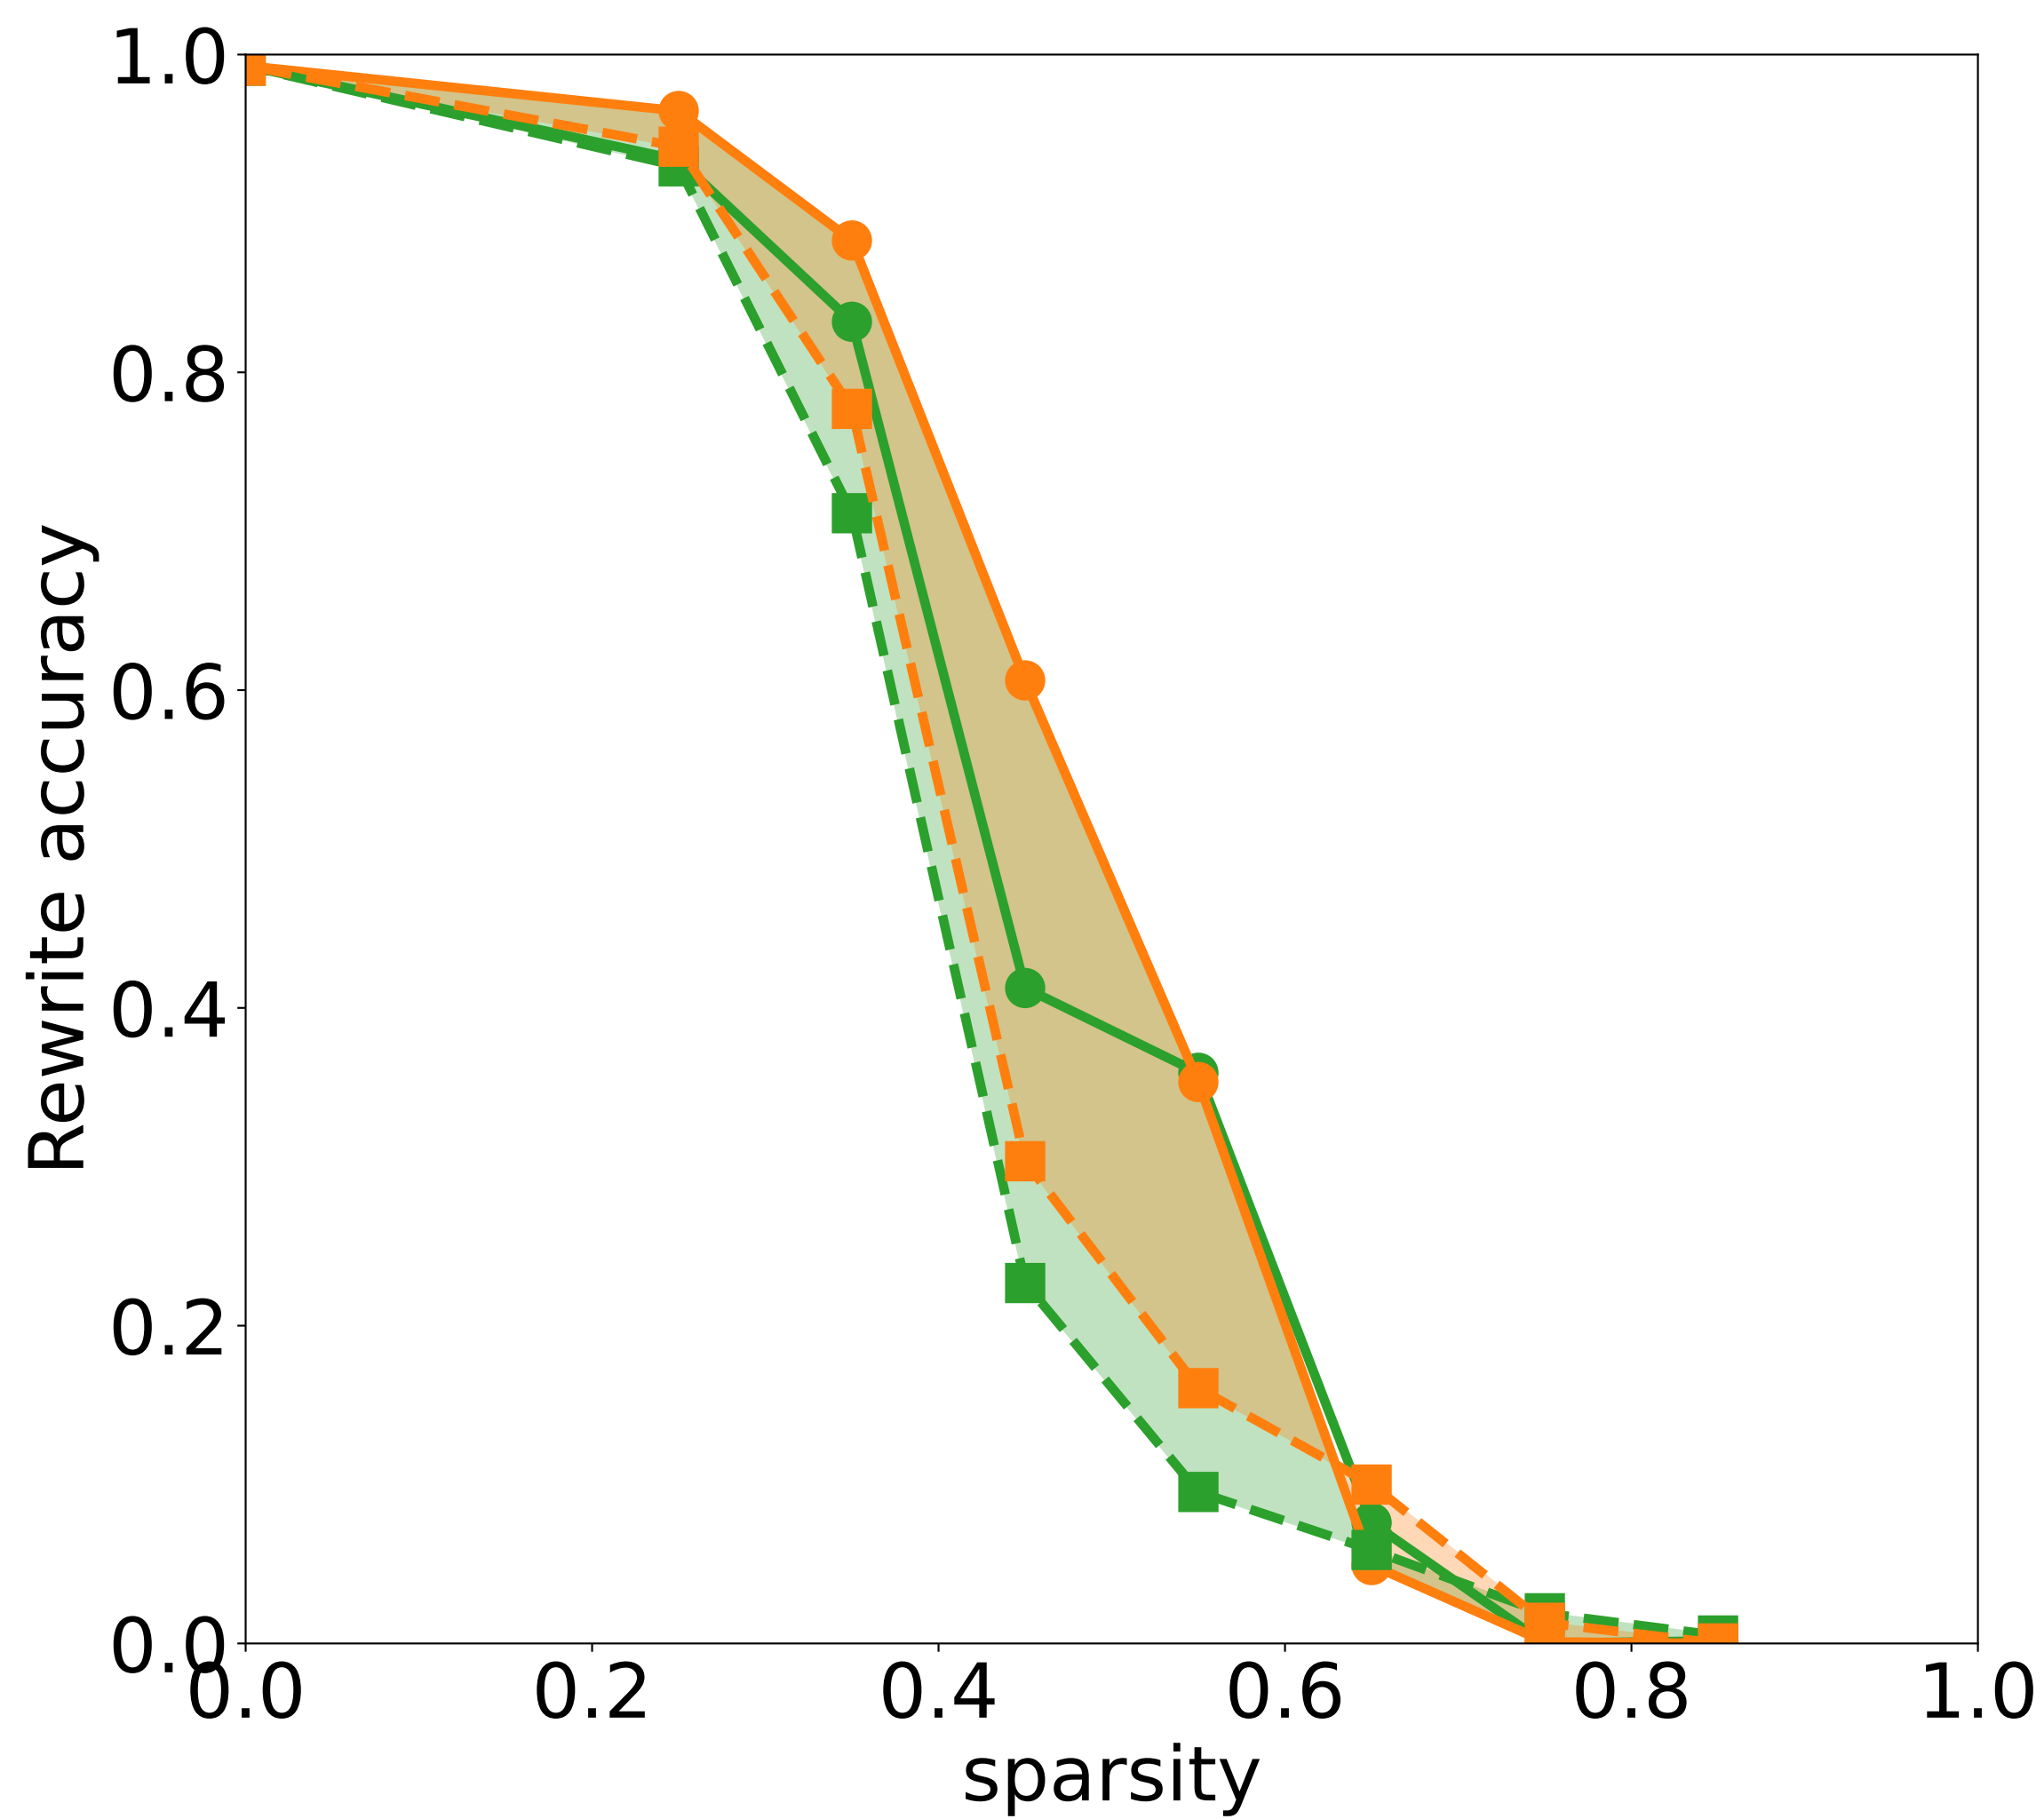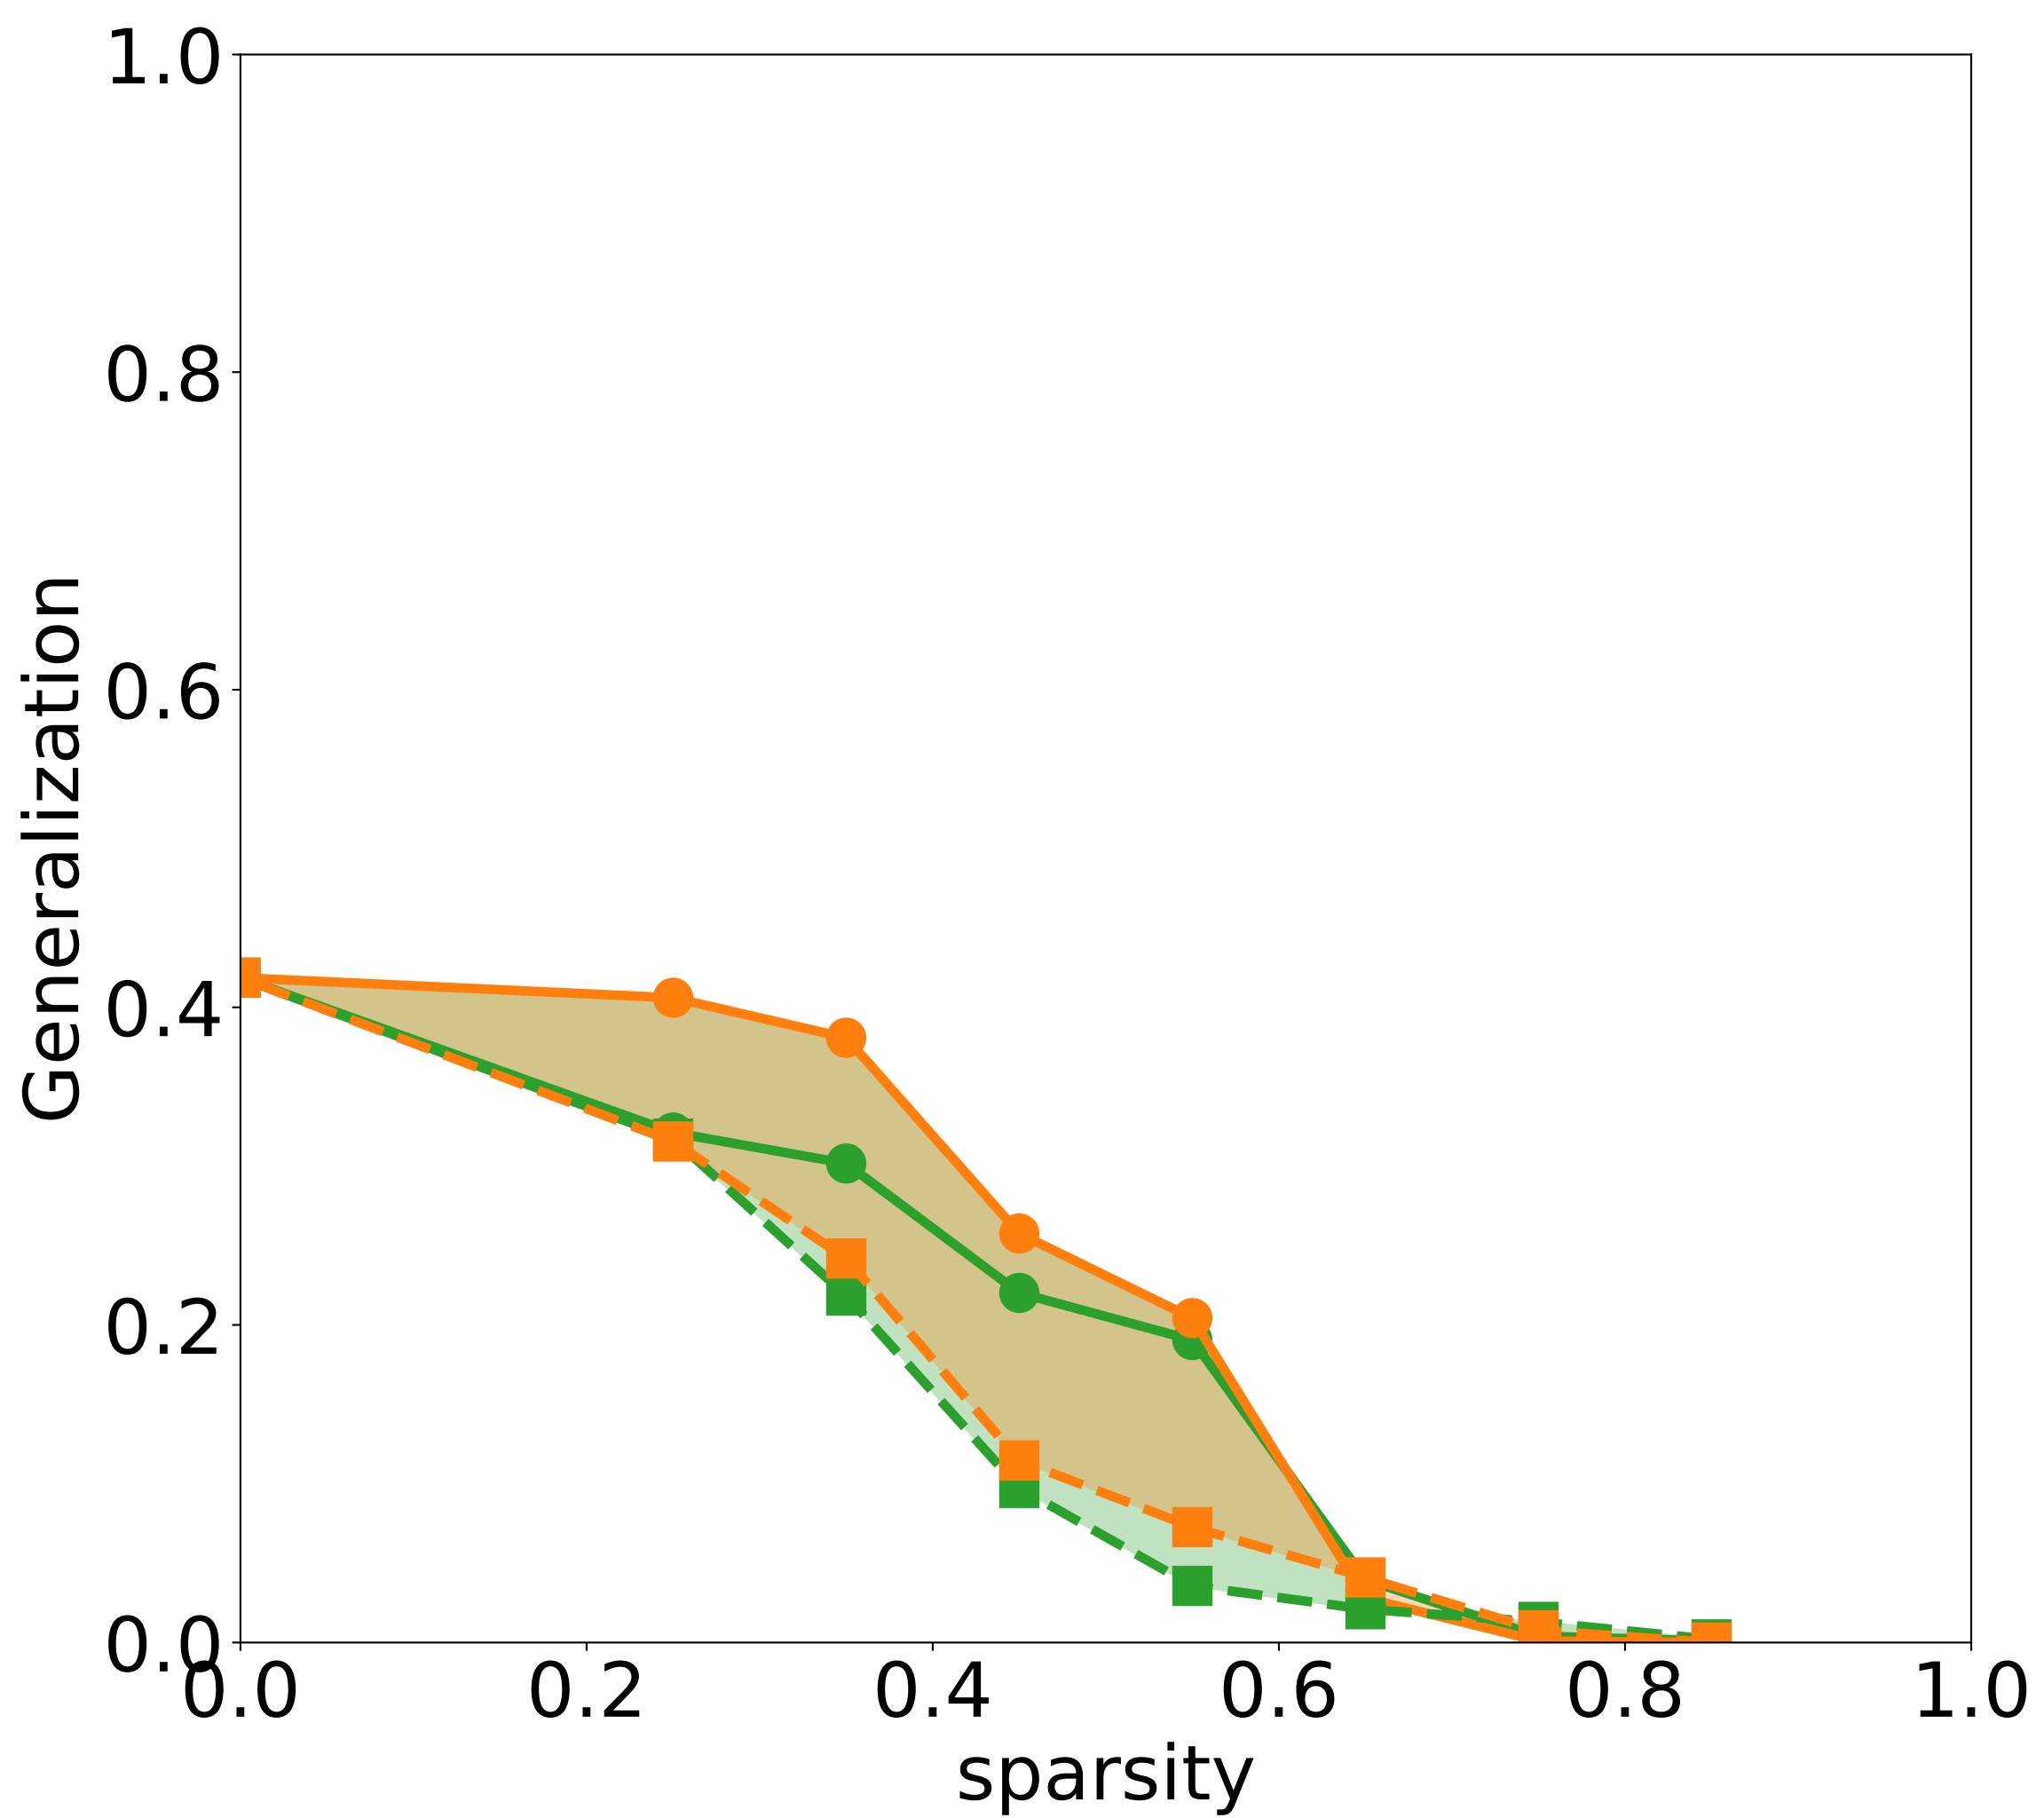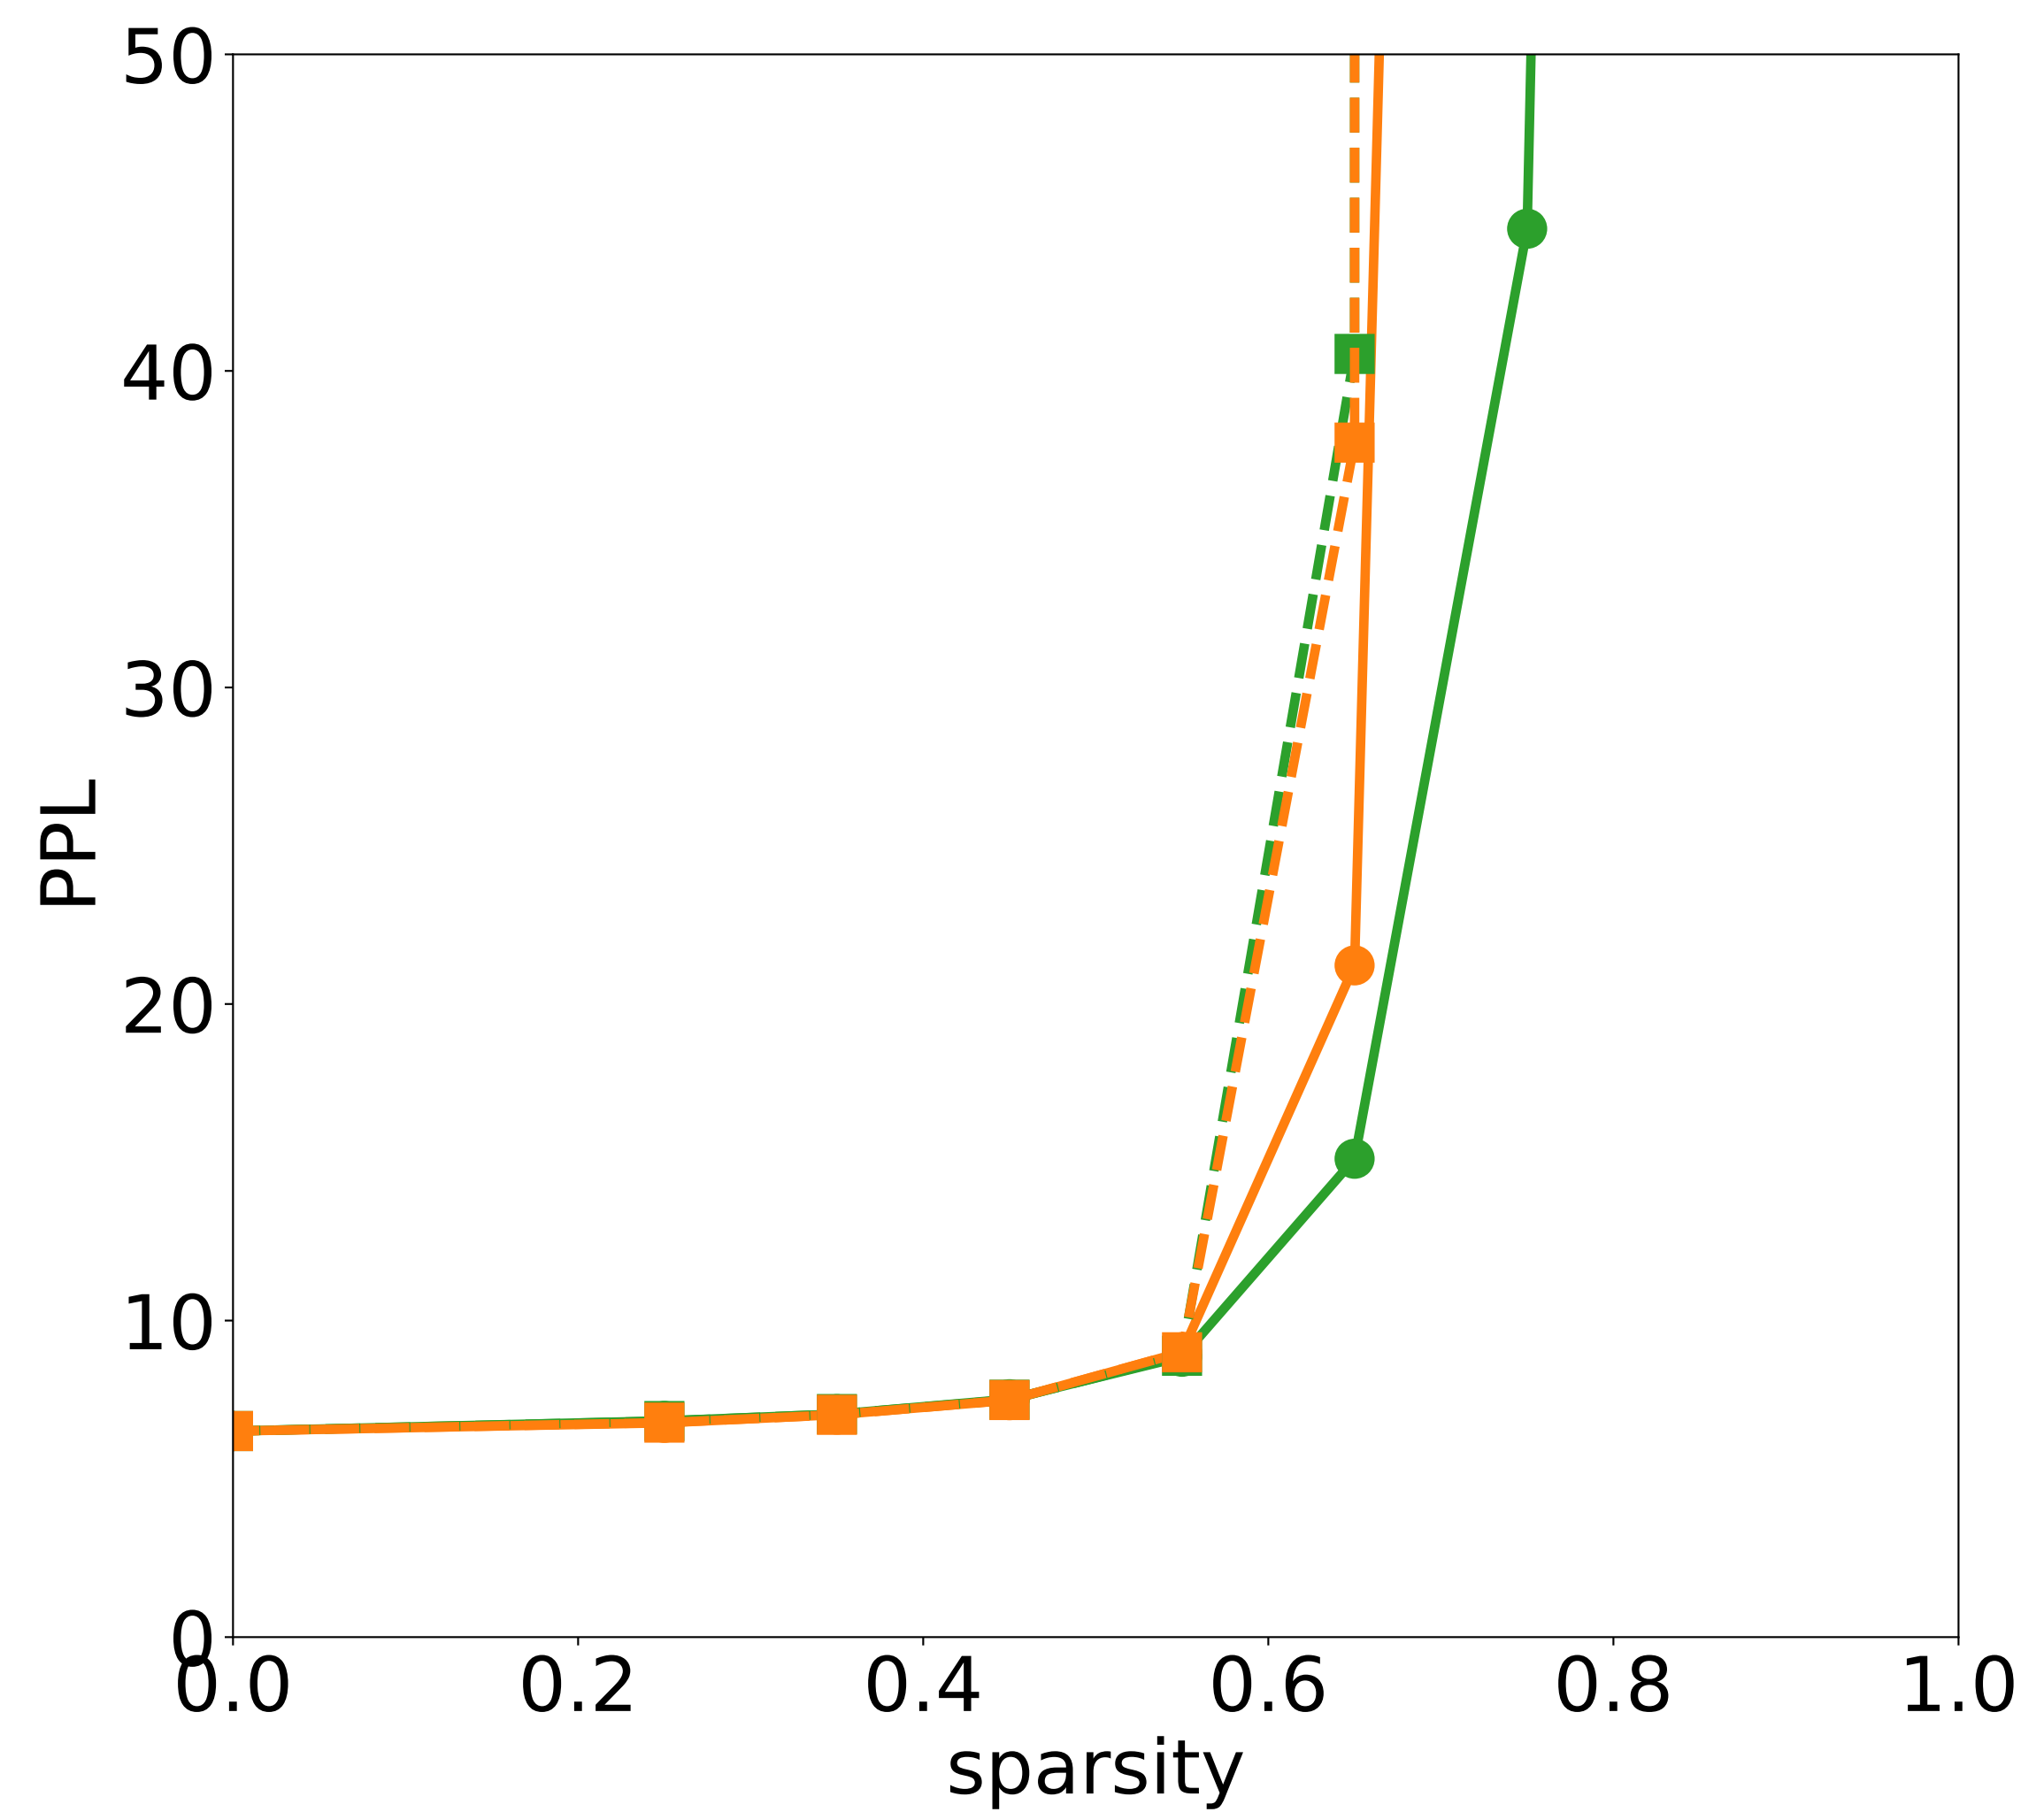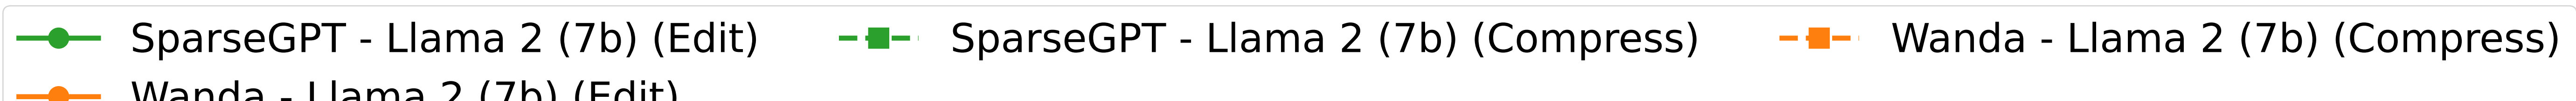

Supplement: supplementary_material [file attachment]

Layer 3

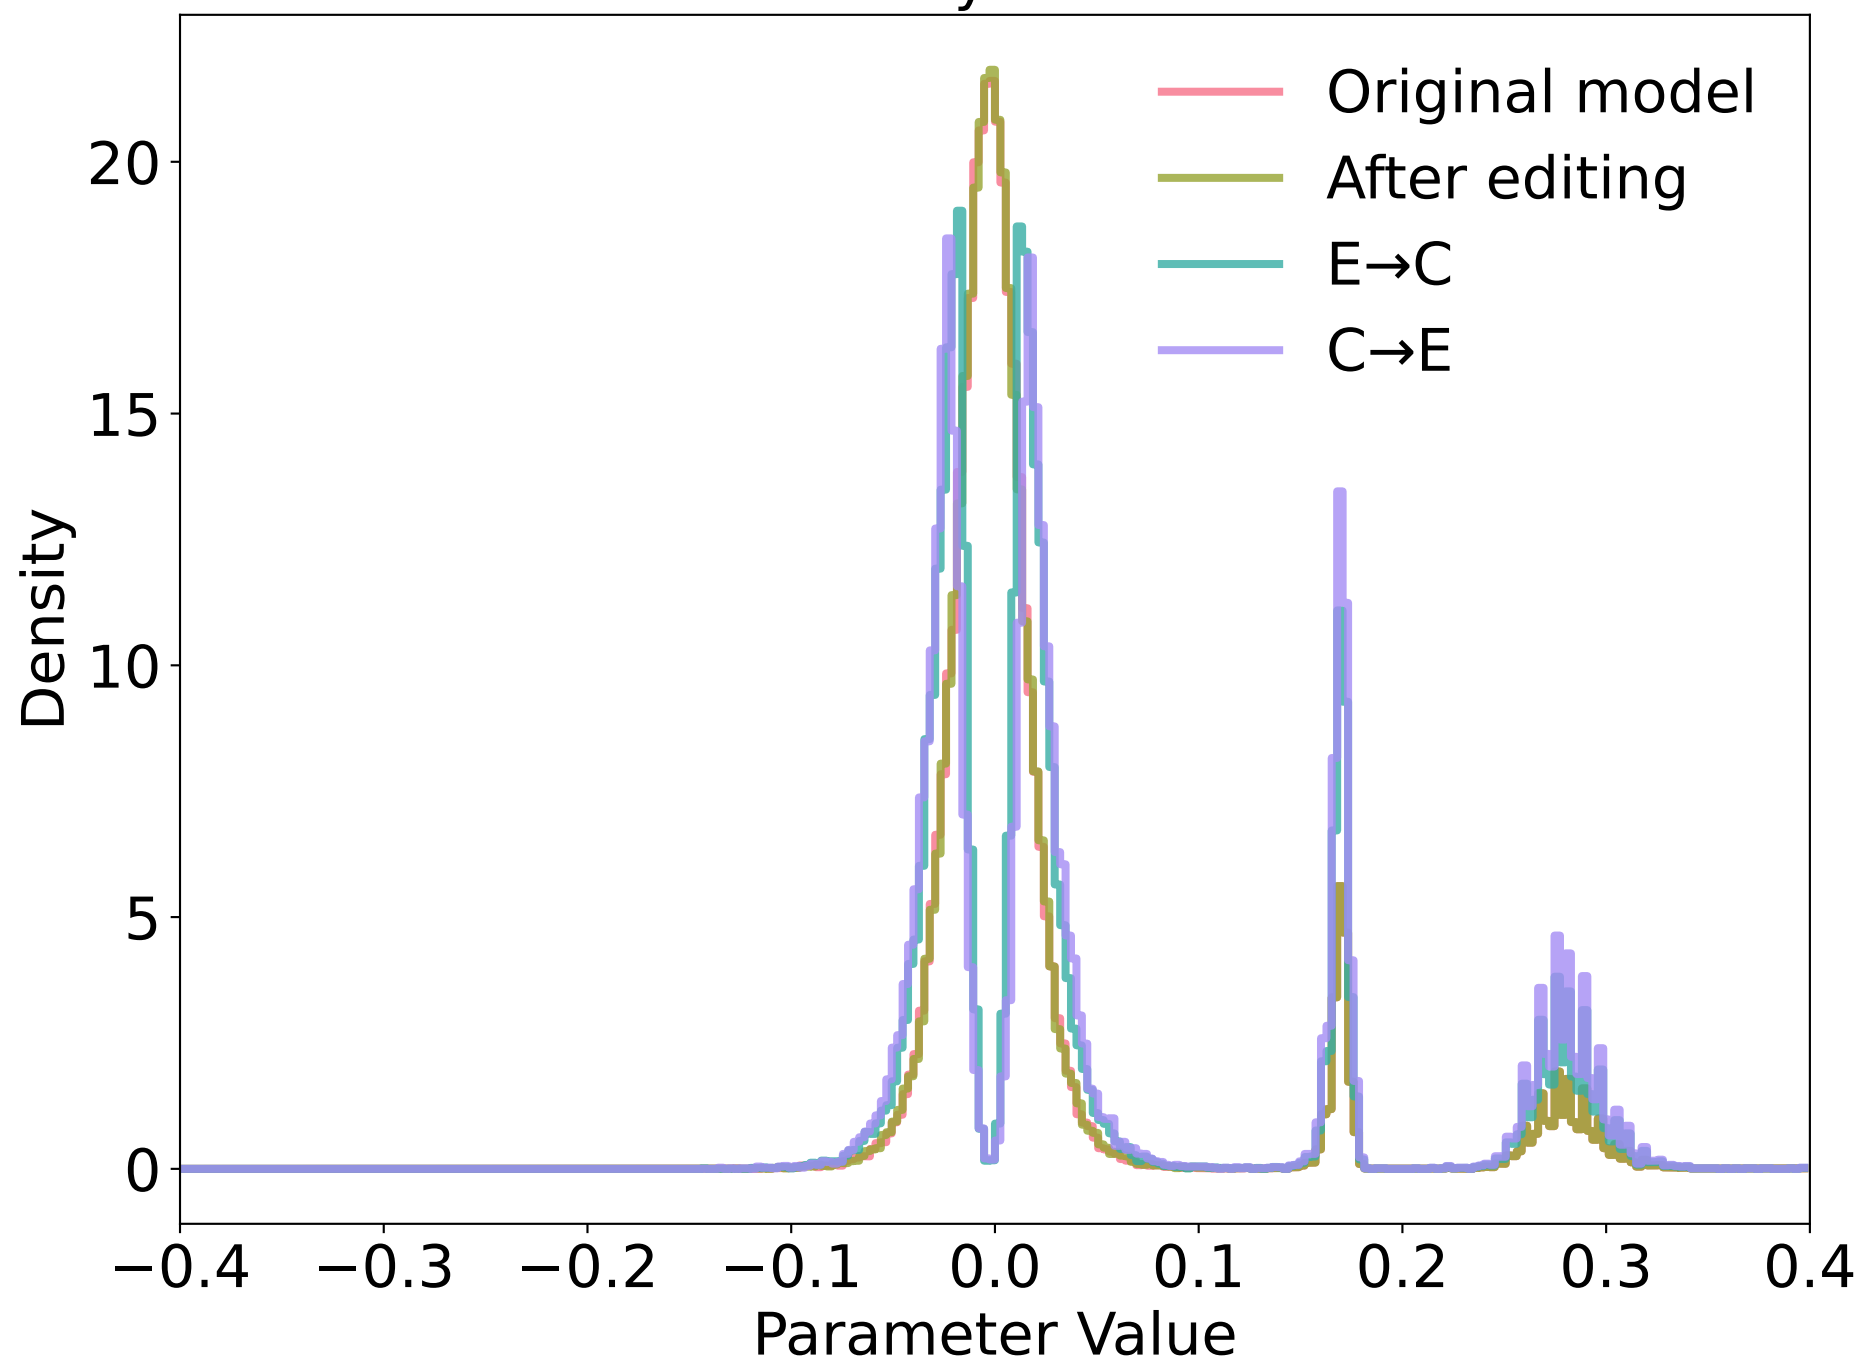

Layer 4

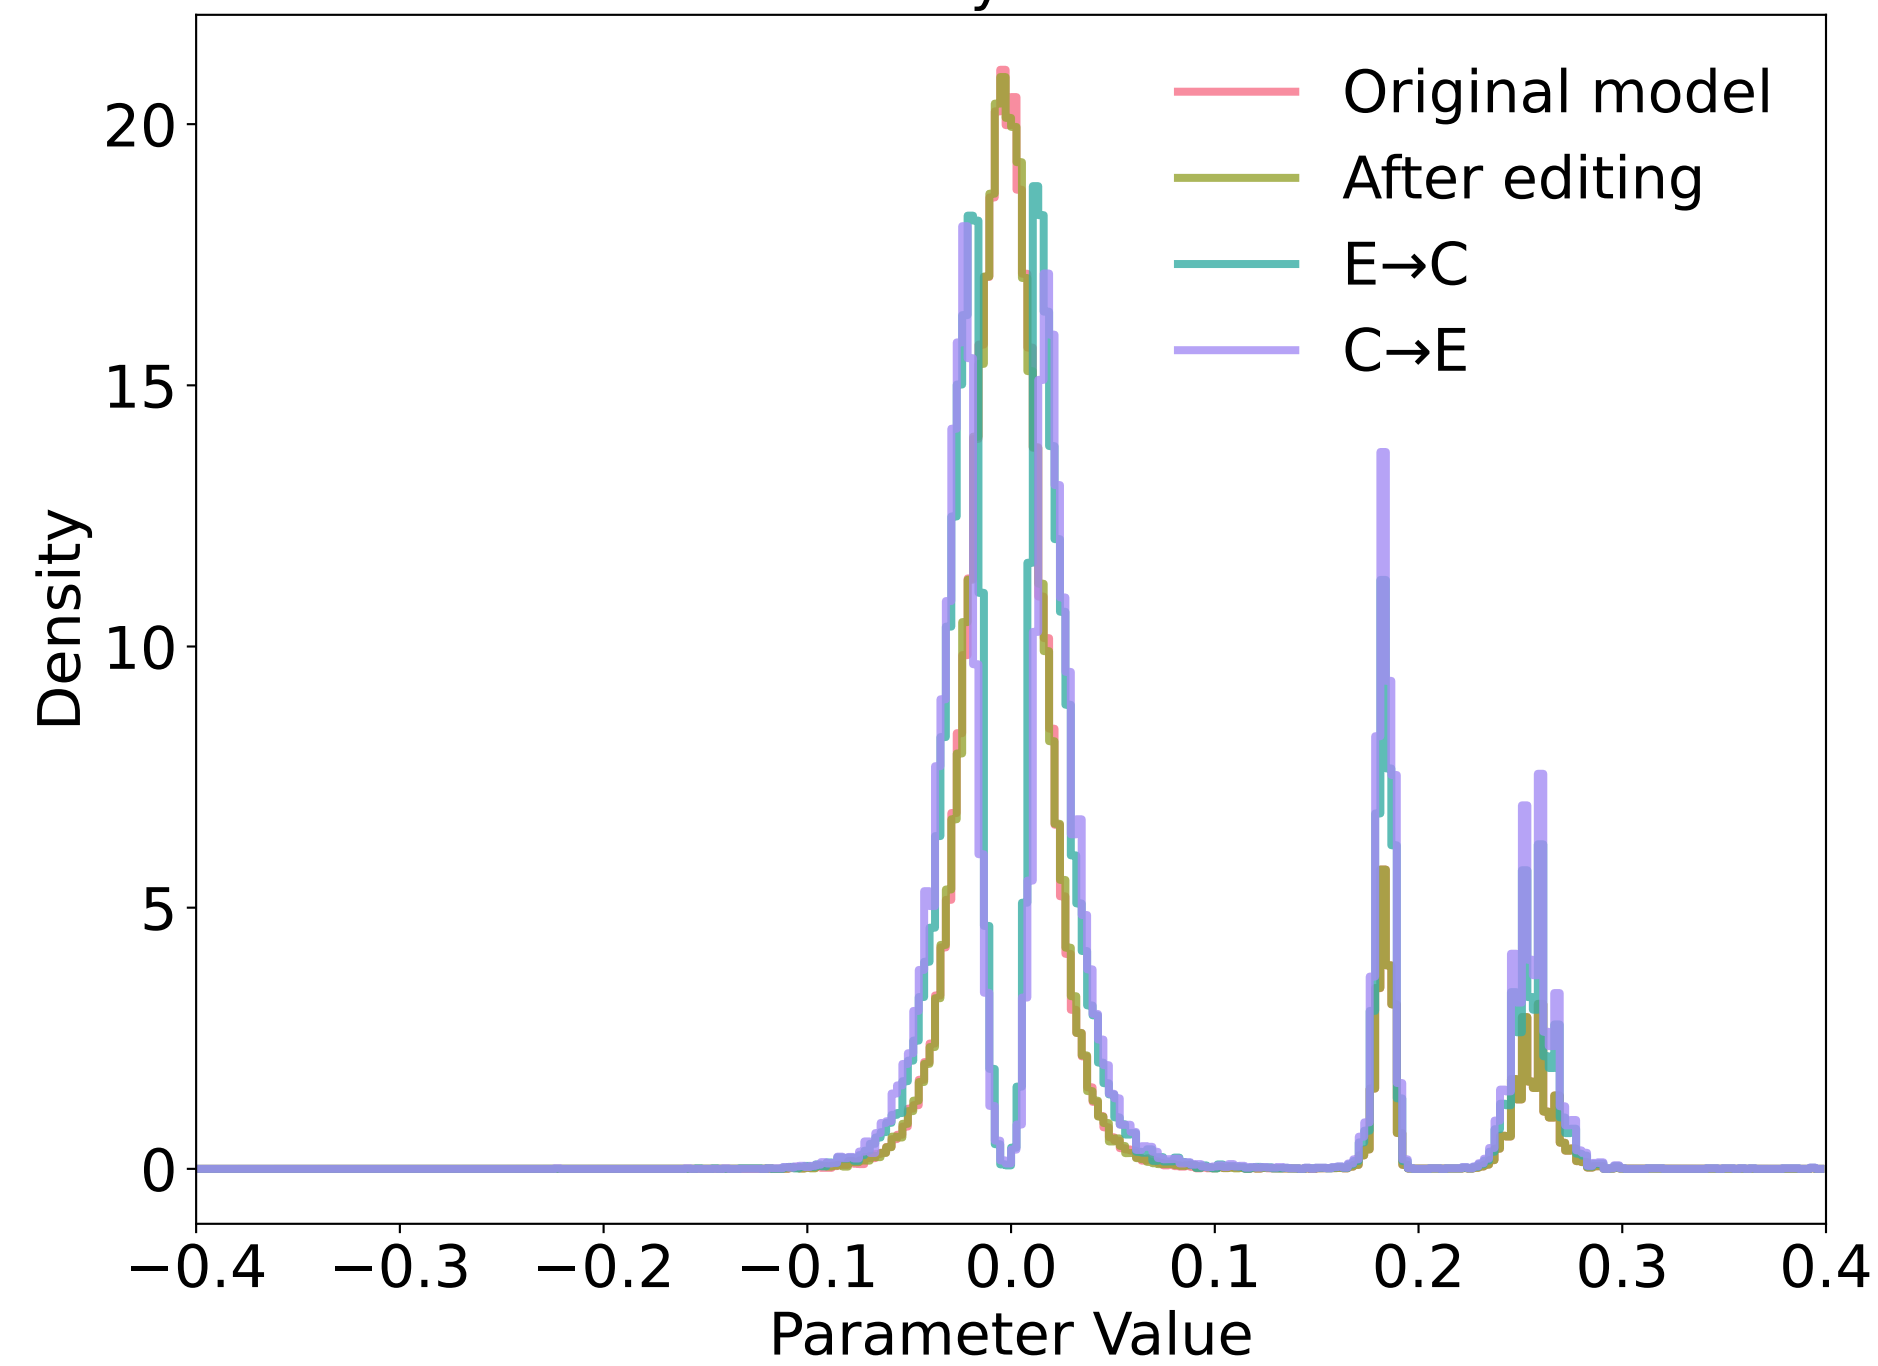

Layer 5

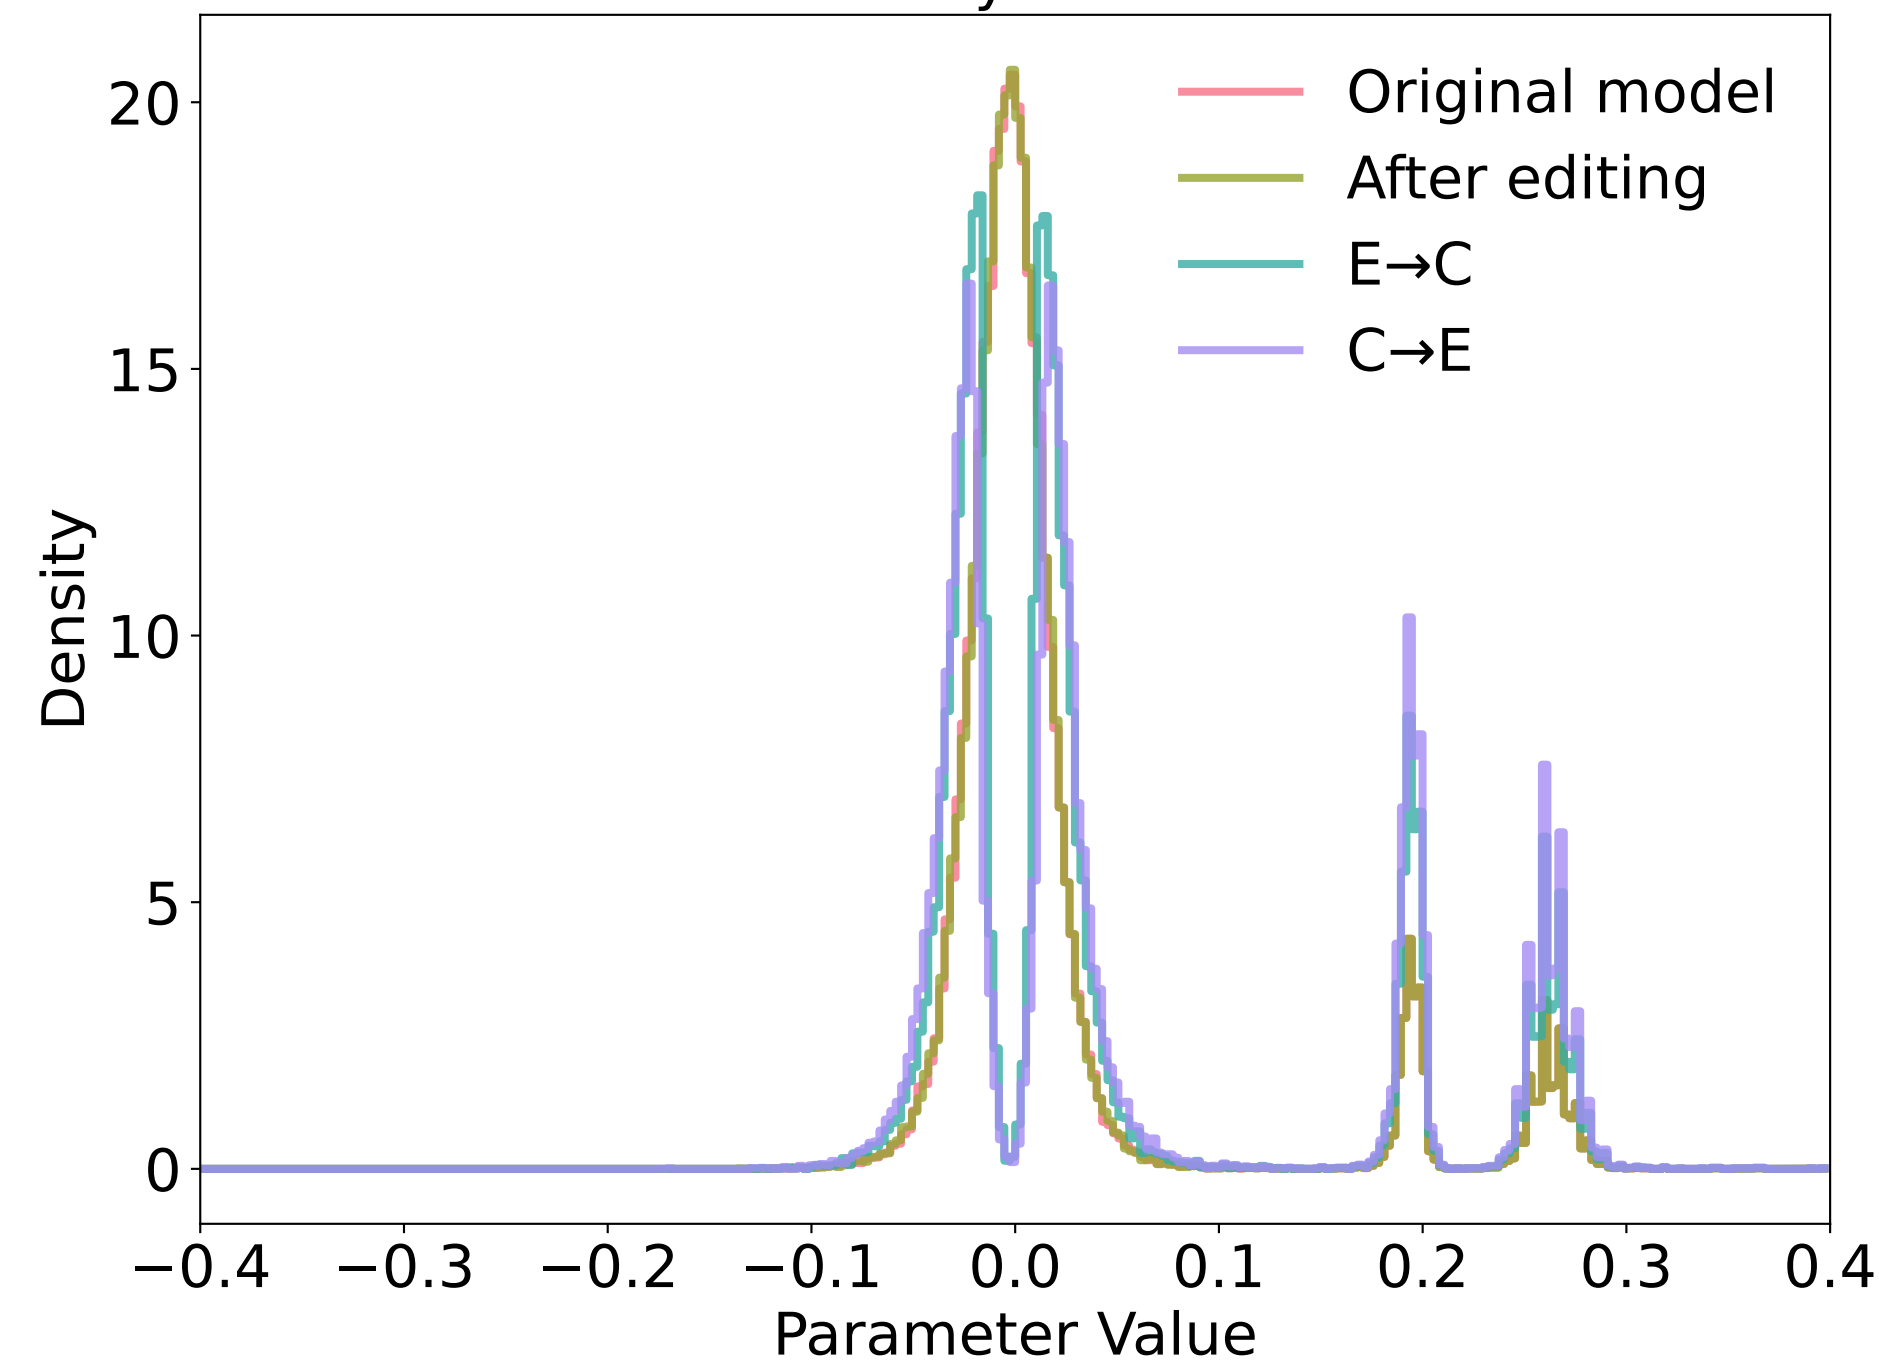

Supplement: supplementary_material [file attachment]

Maximum Composed Success

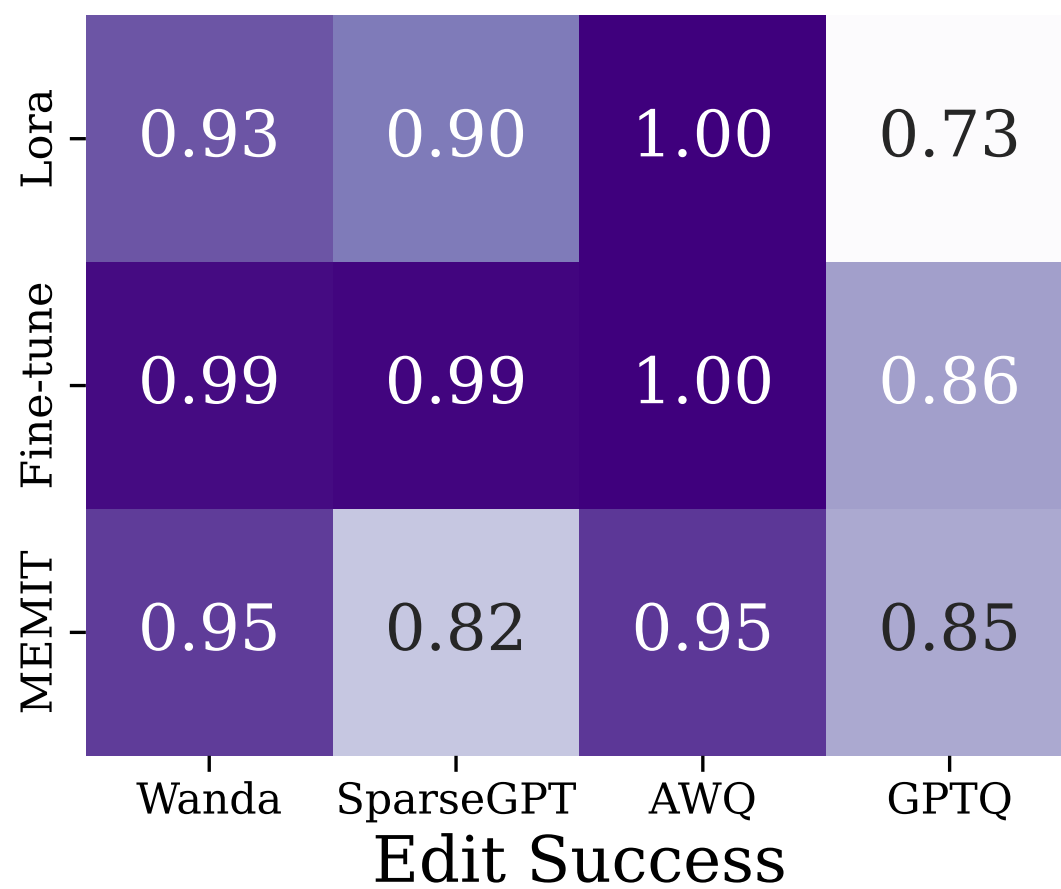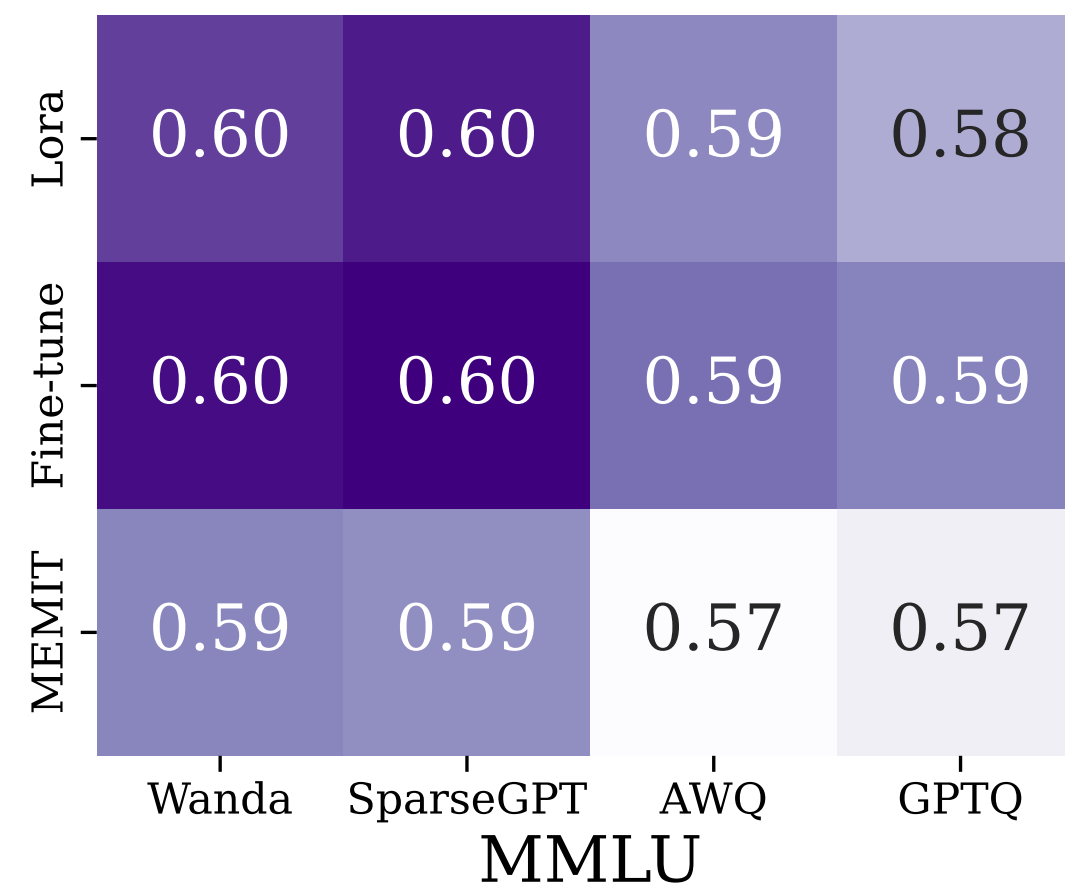

Order Invariance

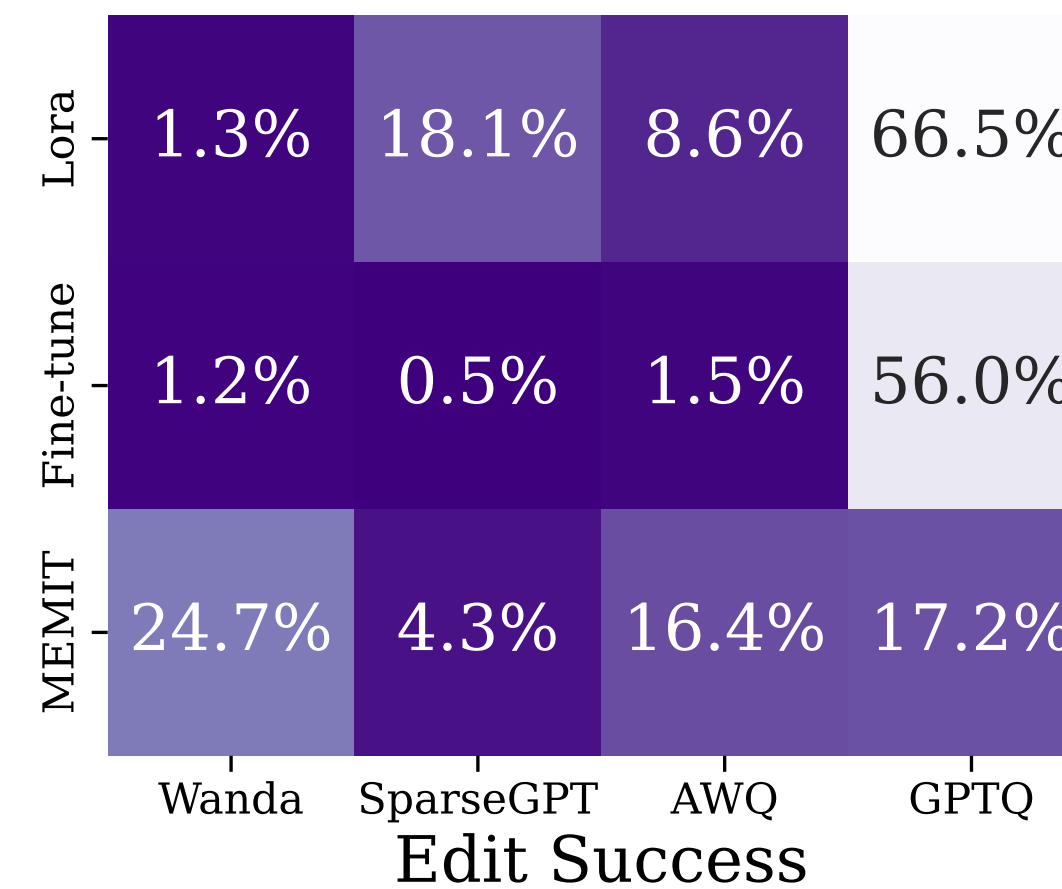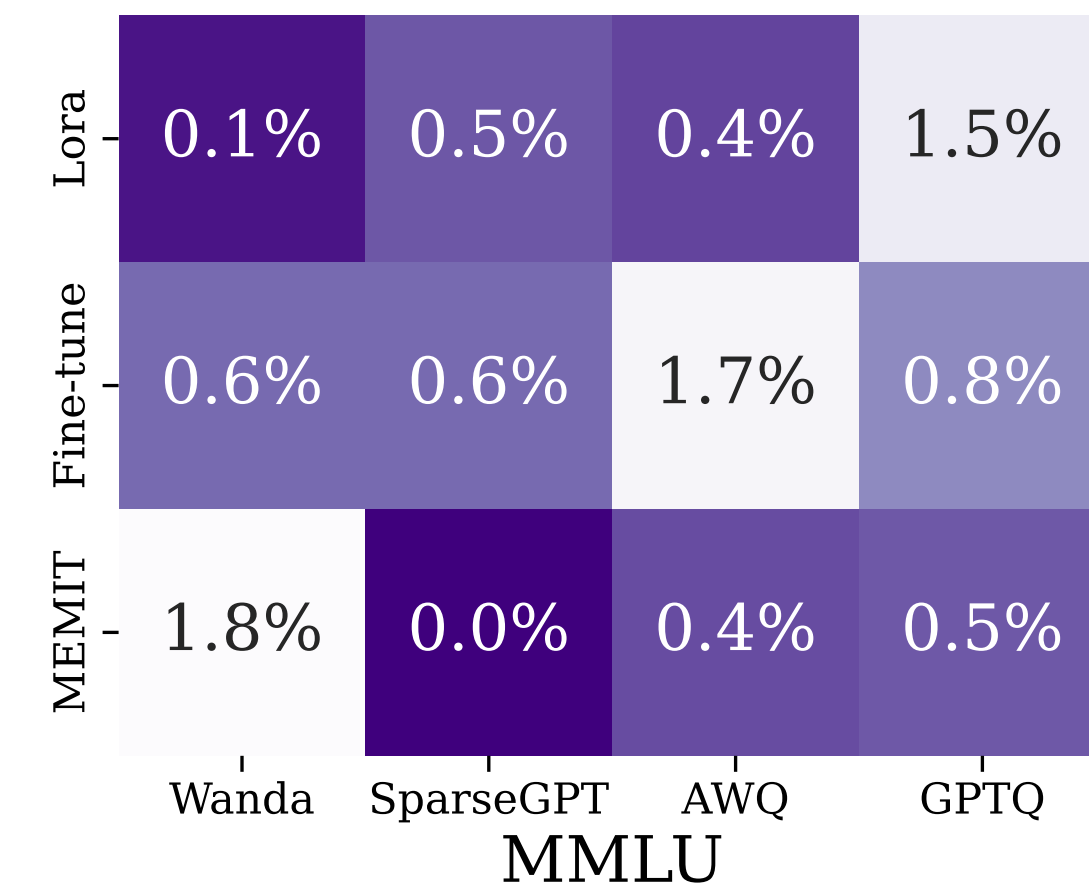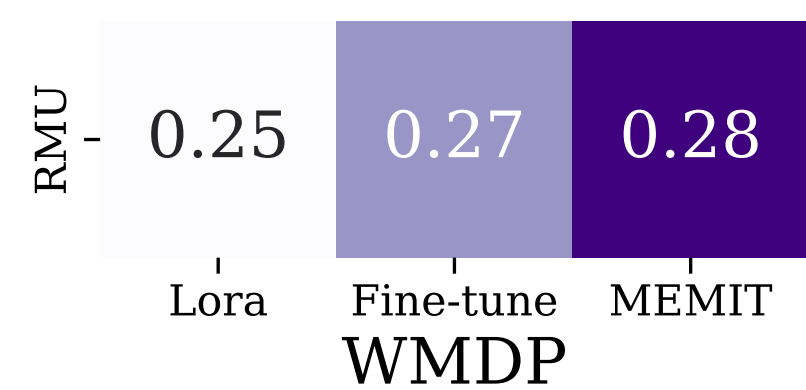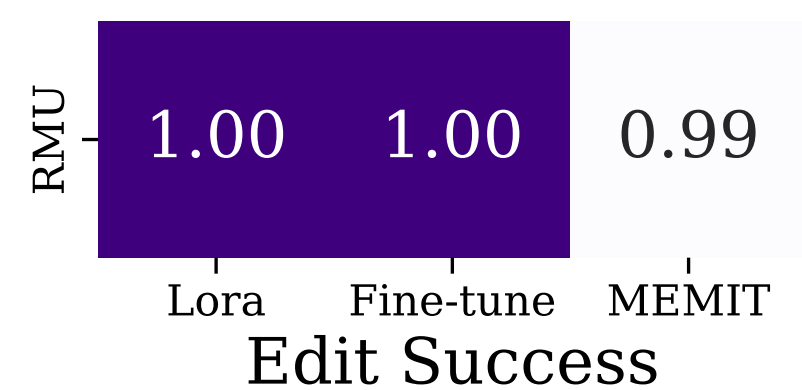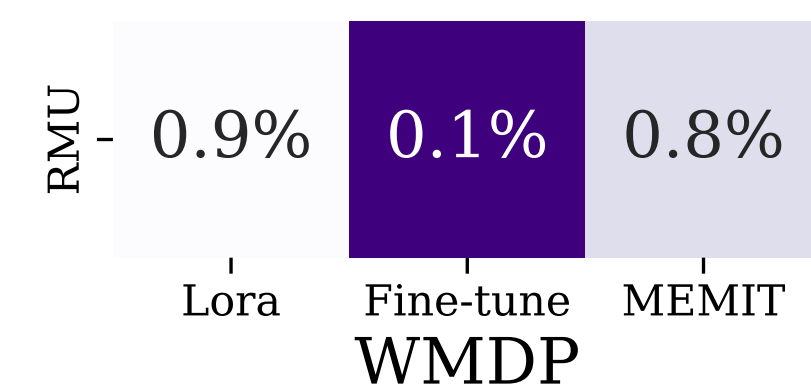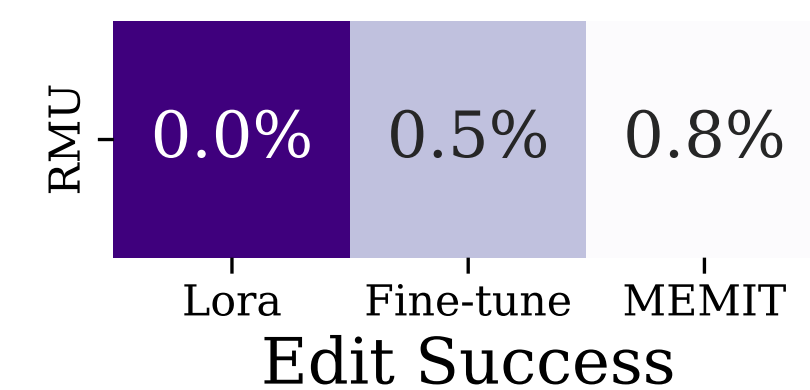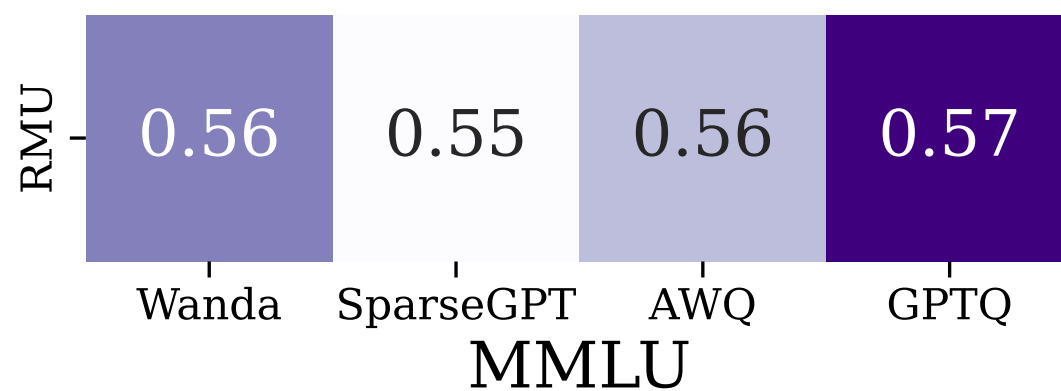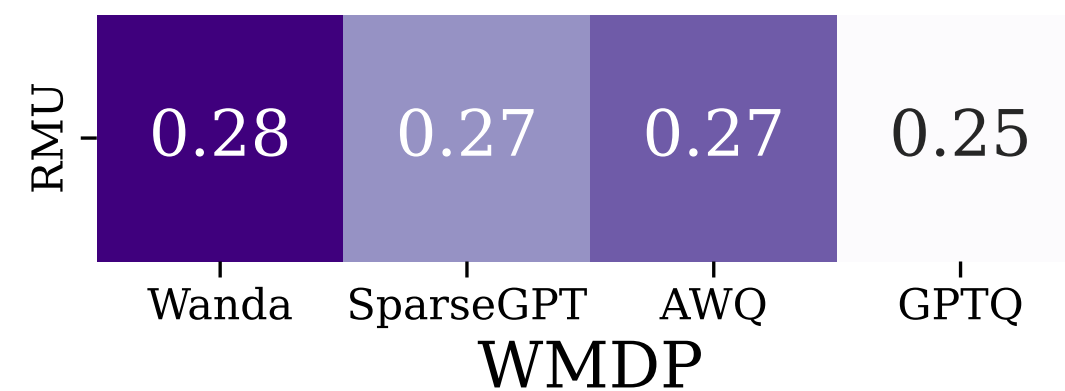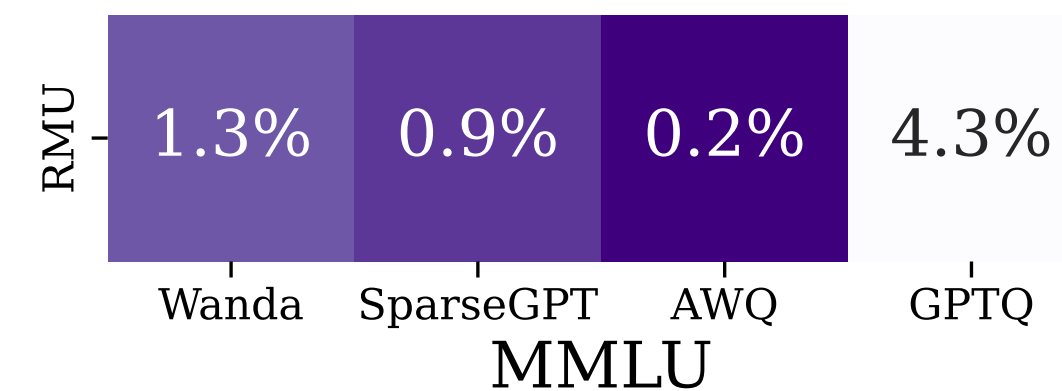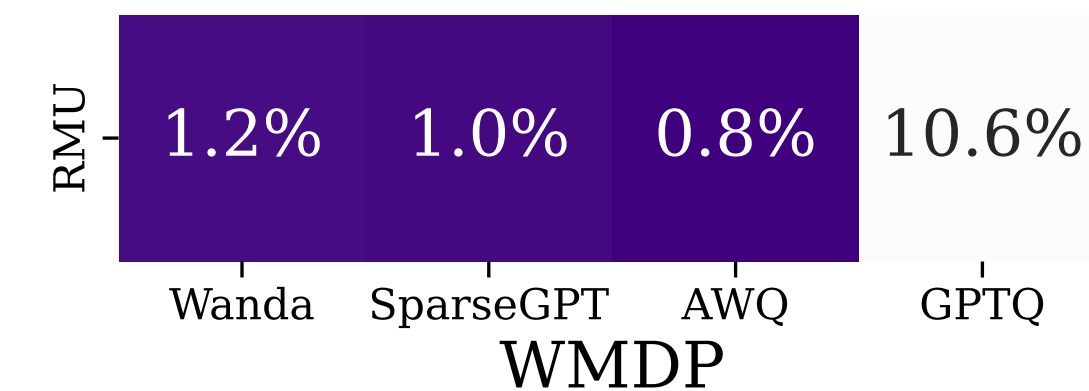

Supplement: supplementary_material [file attachment]

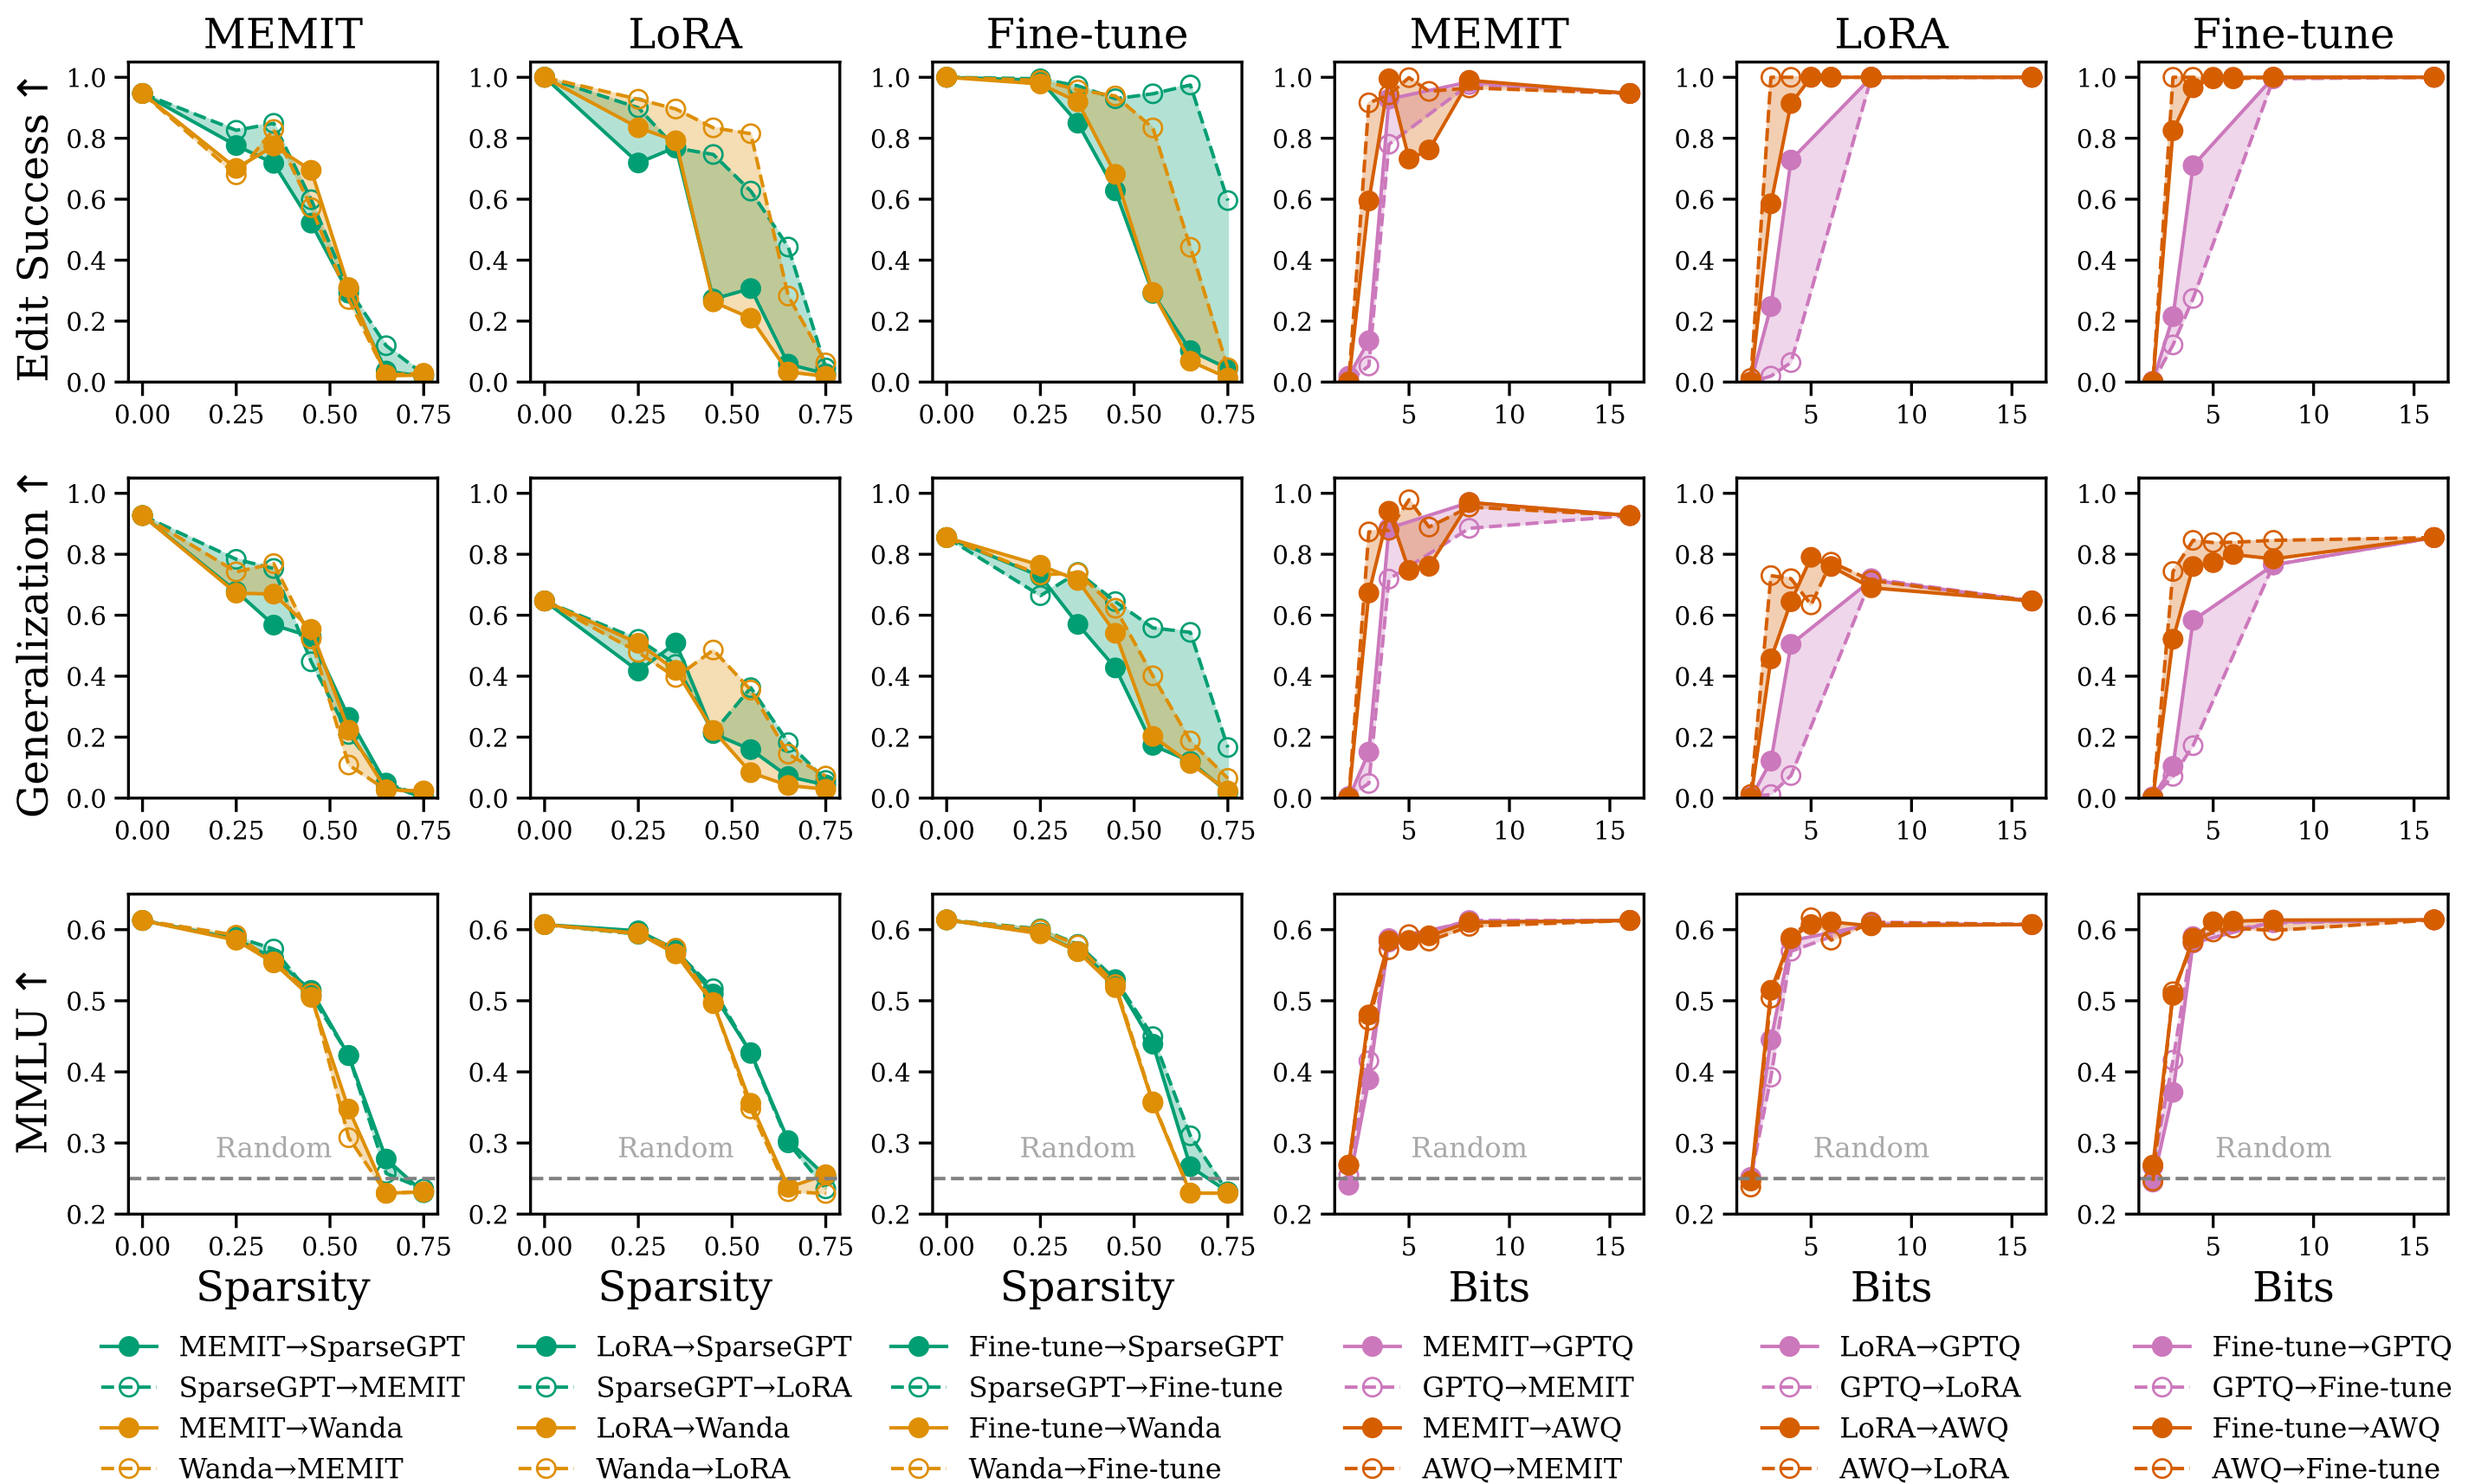

Supplement: supplementary_material [file attachment]

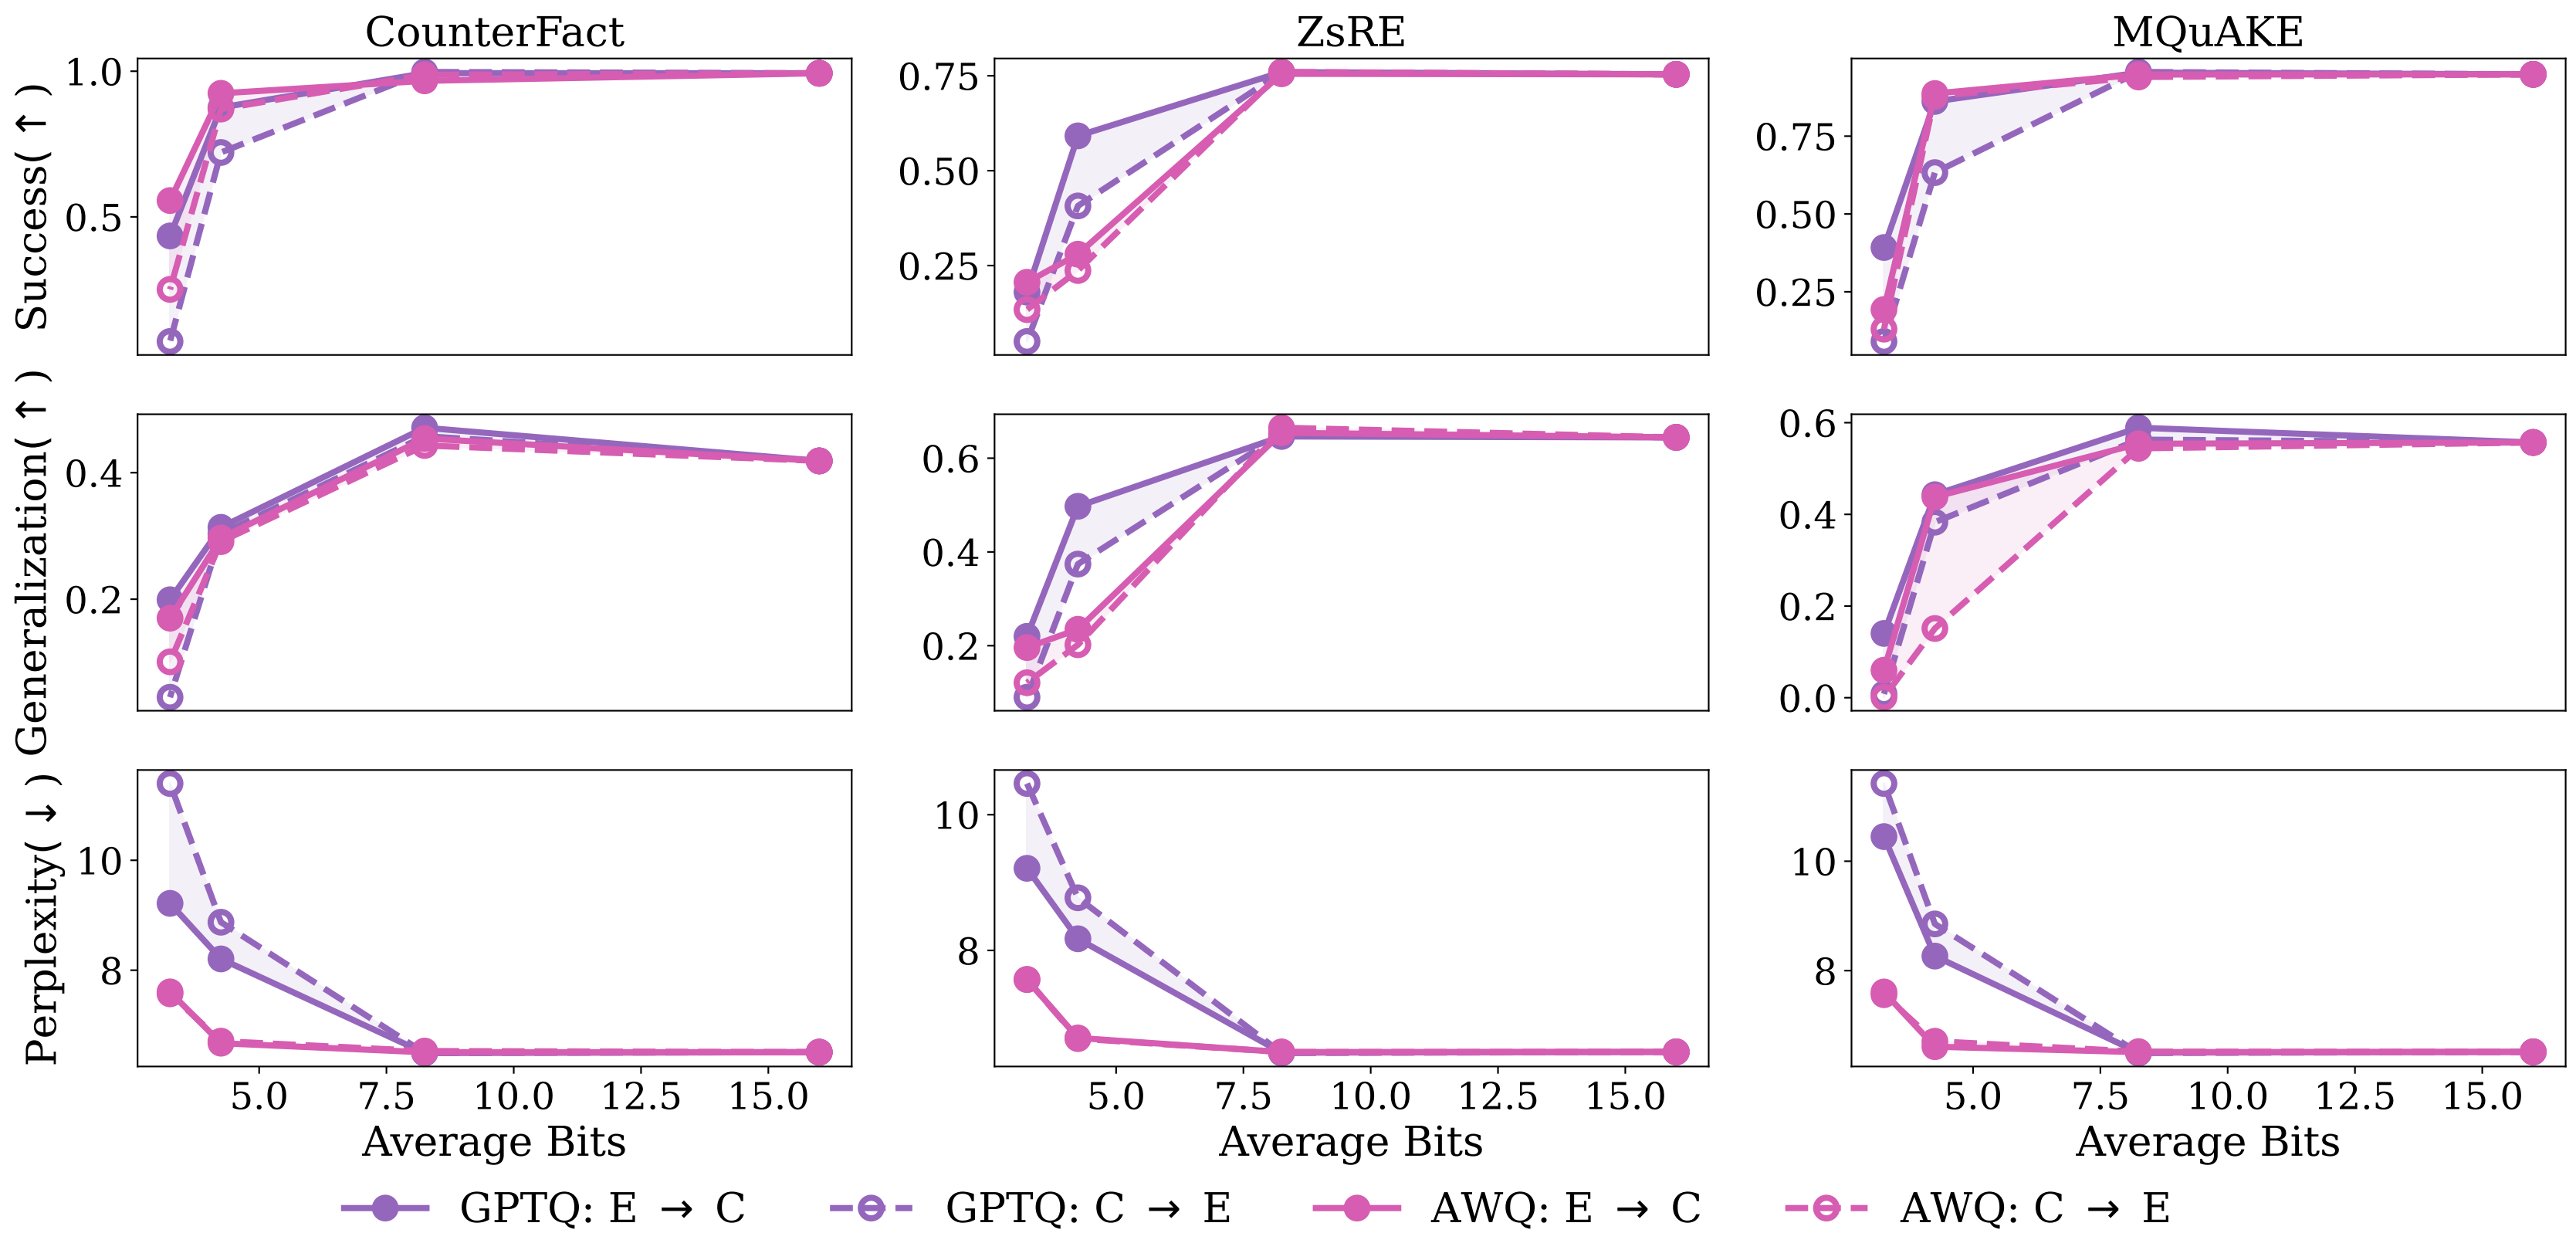

Supplement: supplementary_material [file attachment]

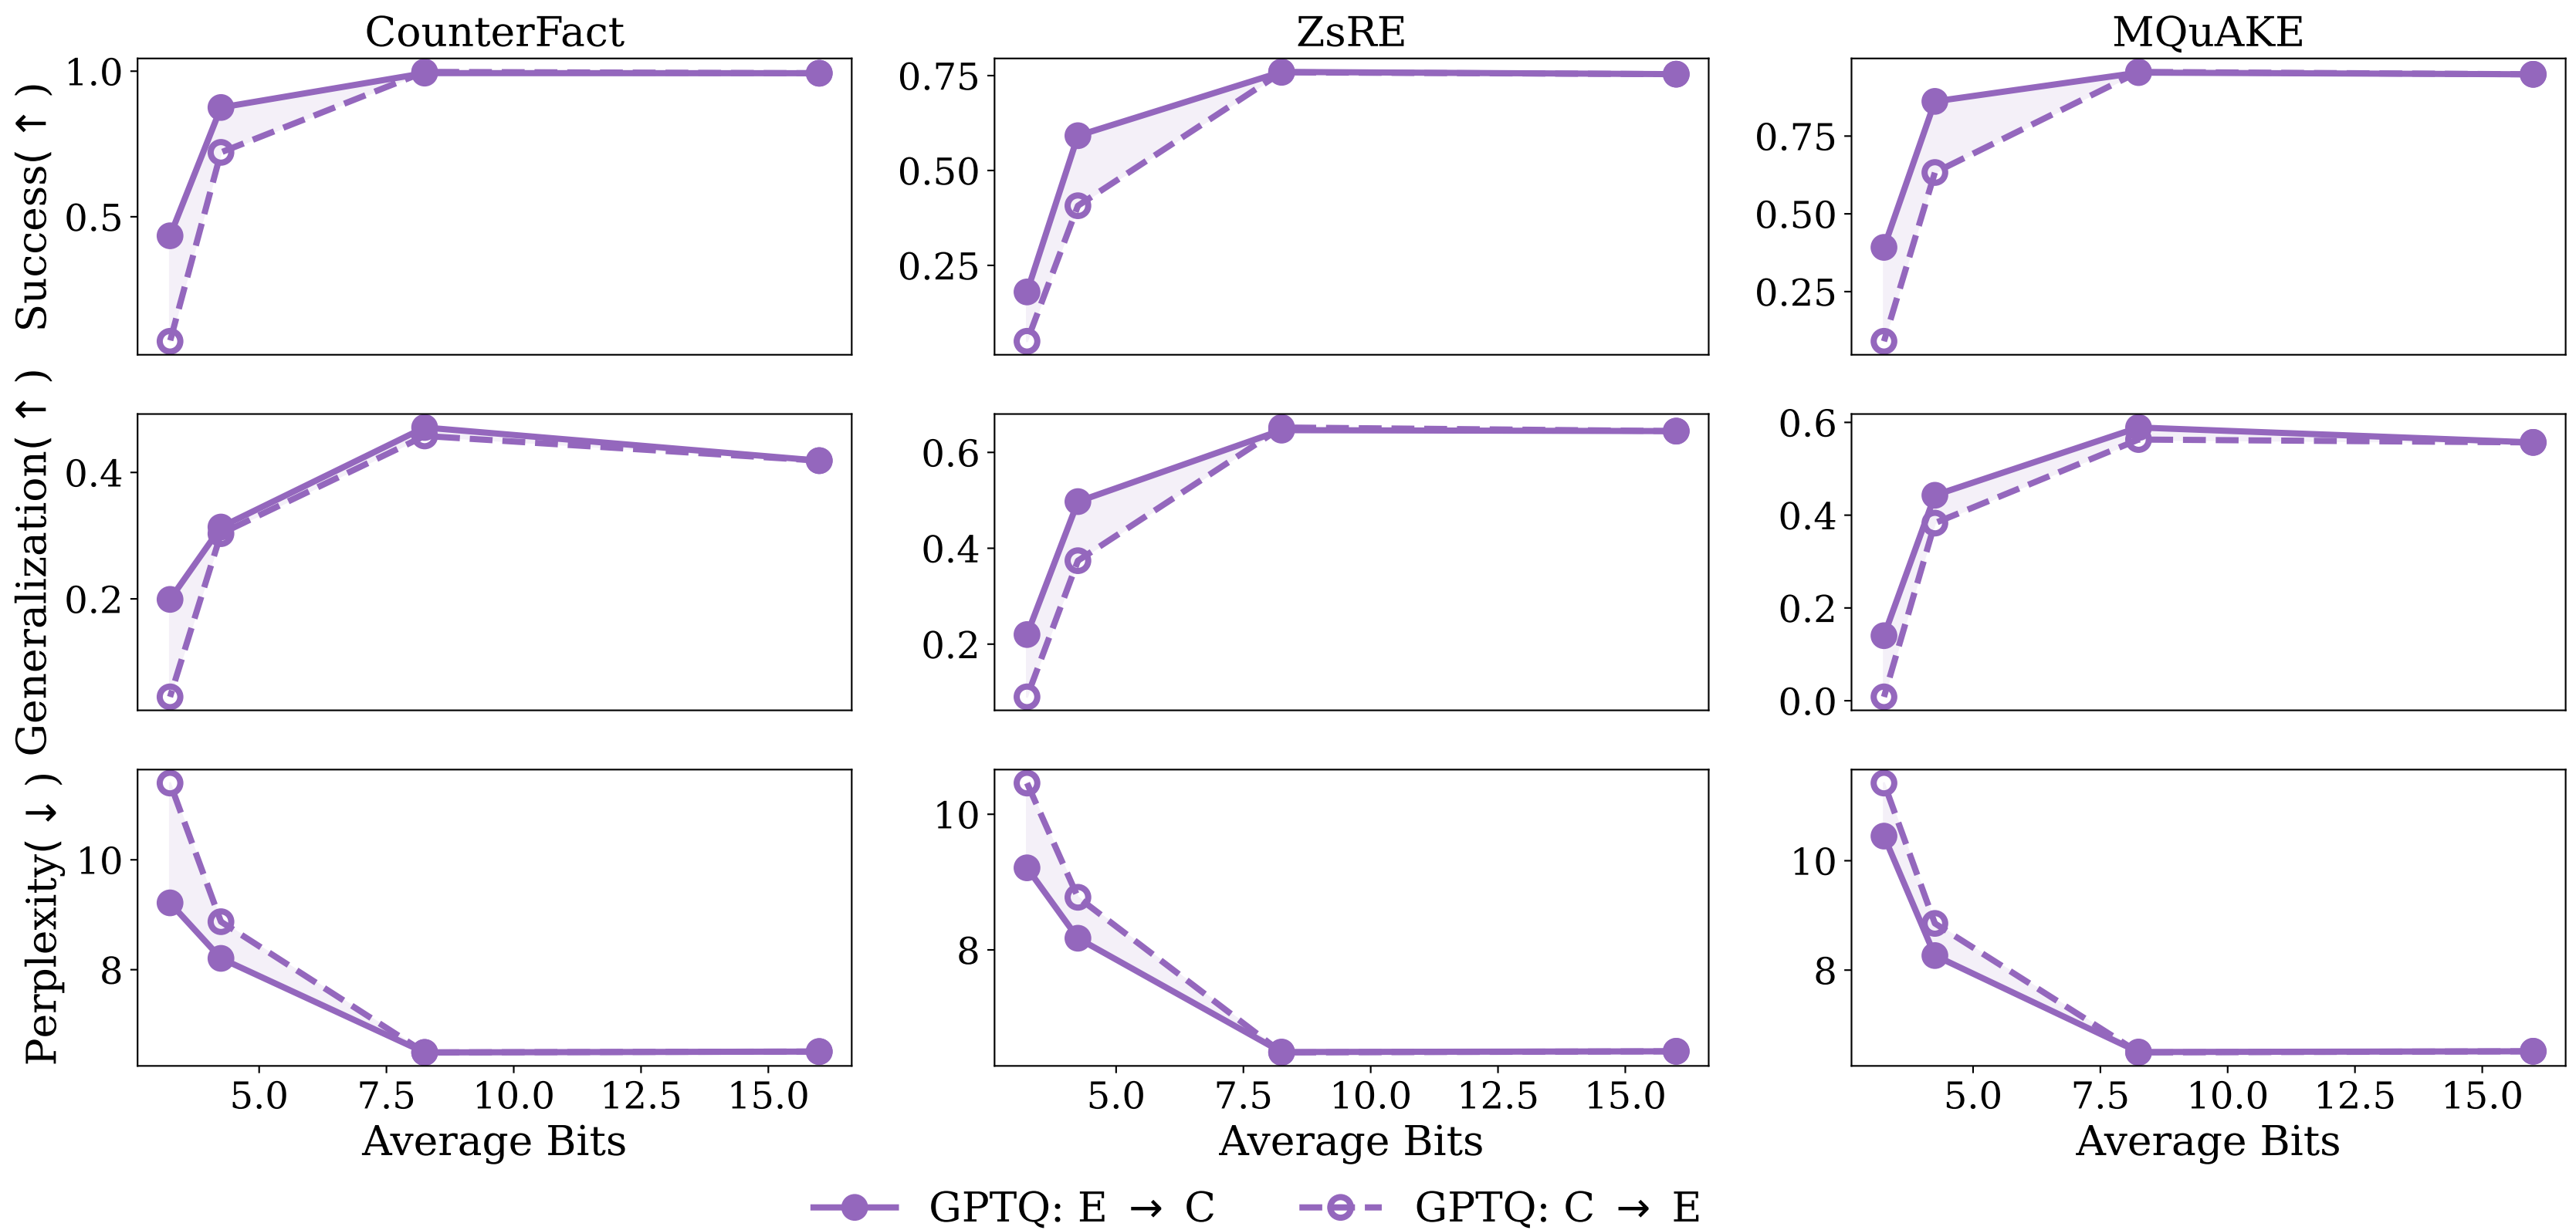

Supplement: supplementary_material [file attachment]

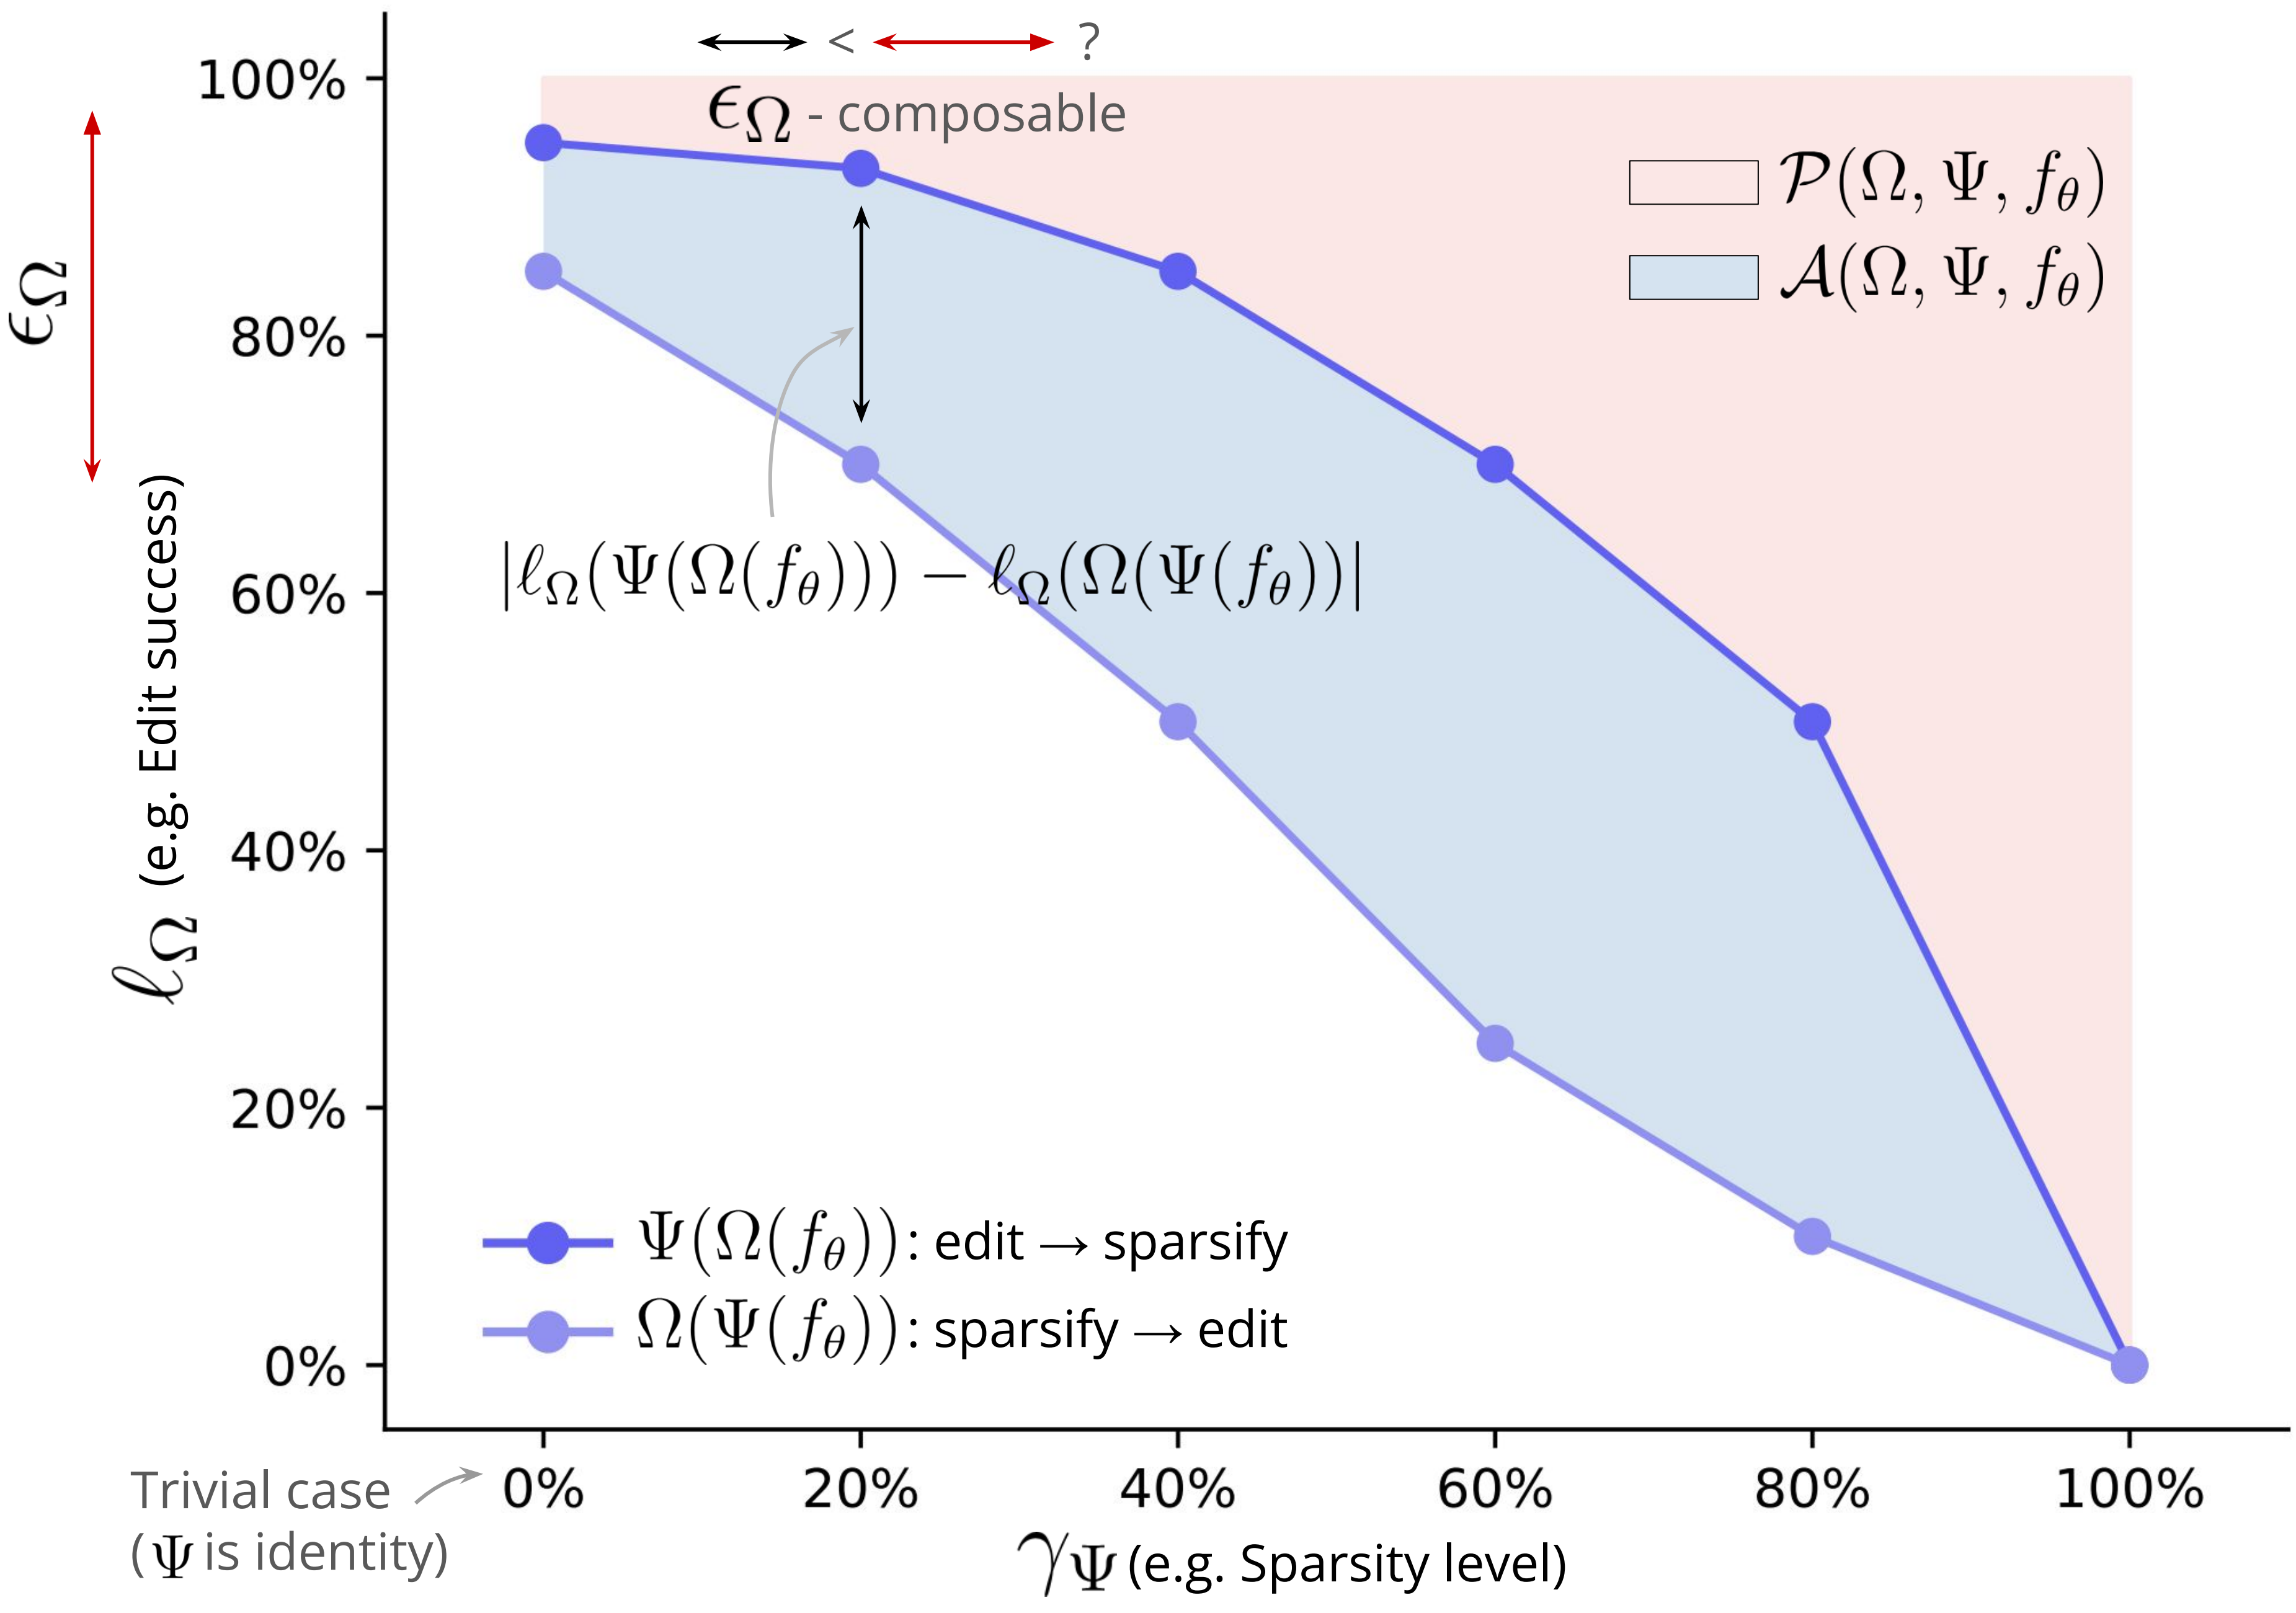

Supplement: supplementary_material [file attachment]

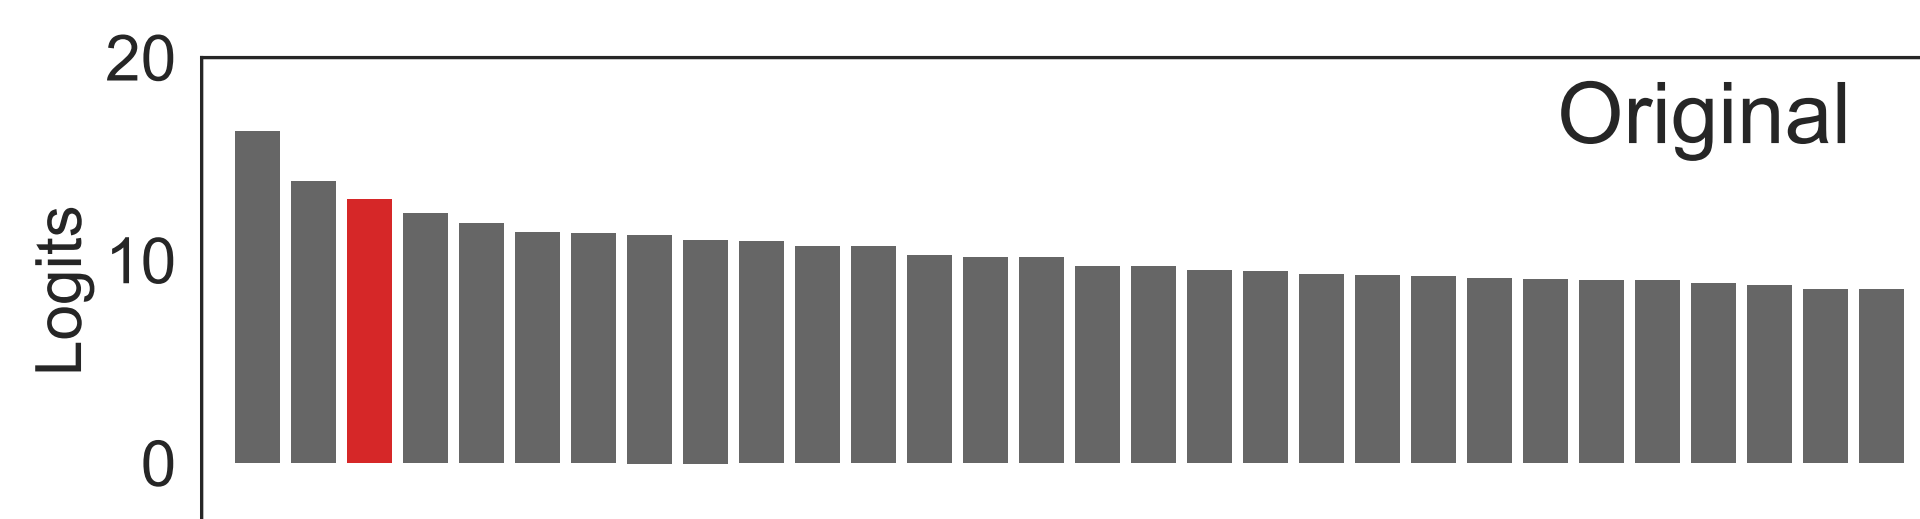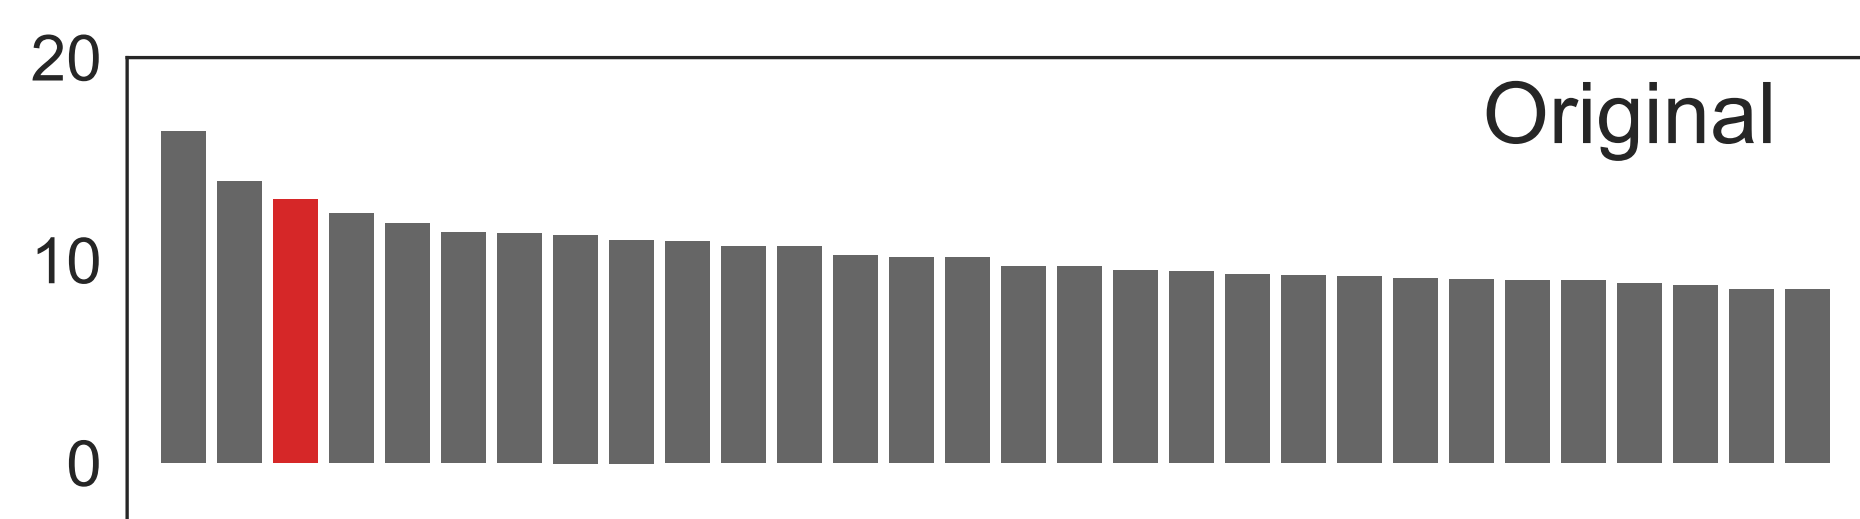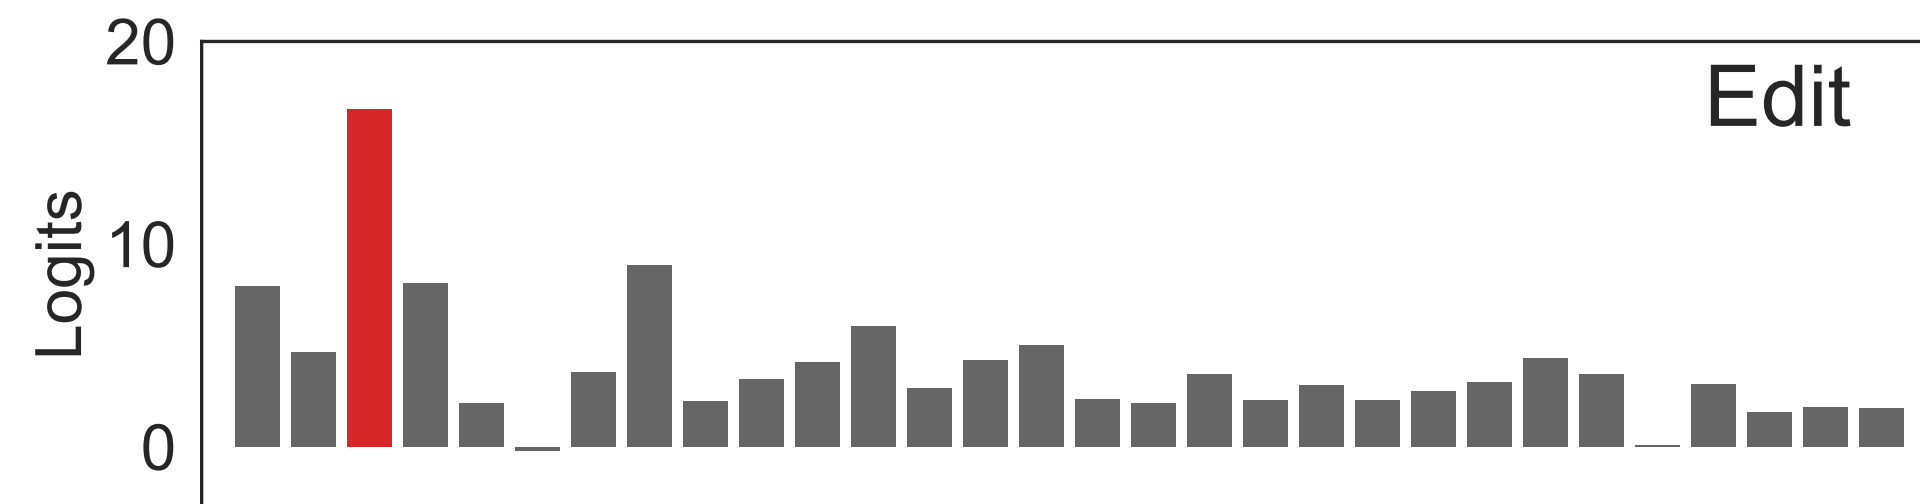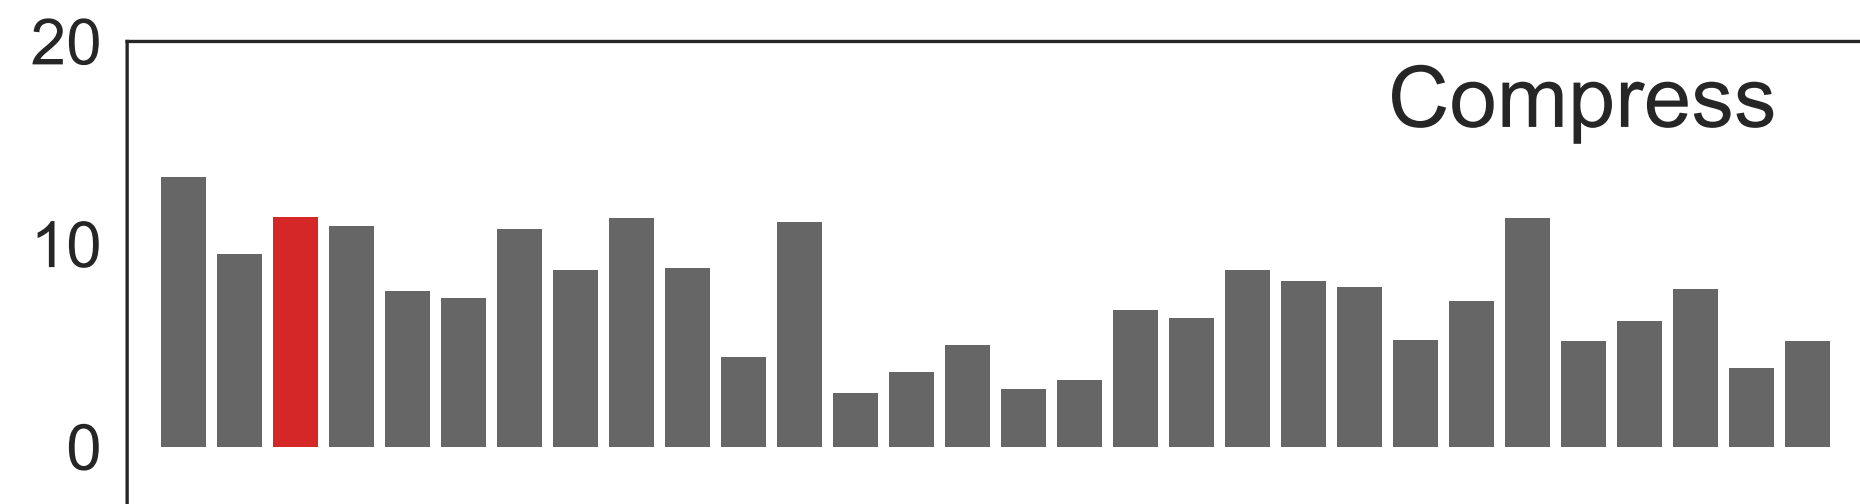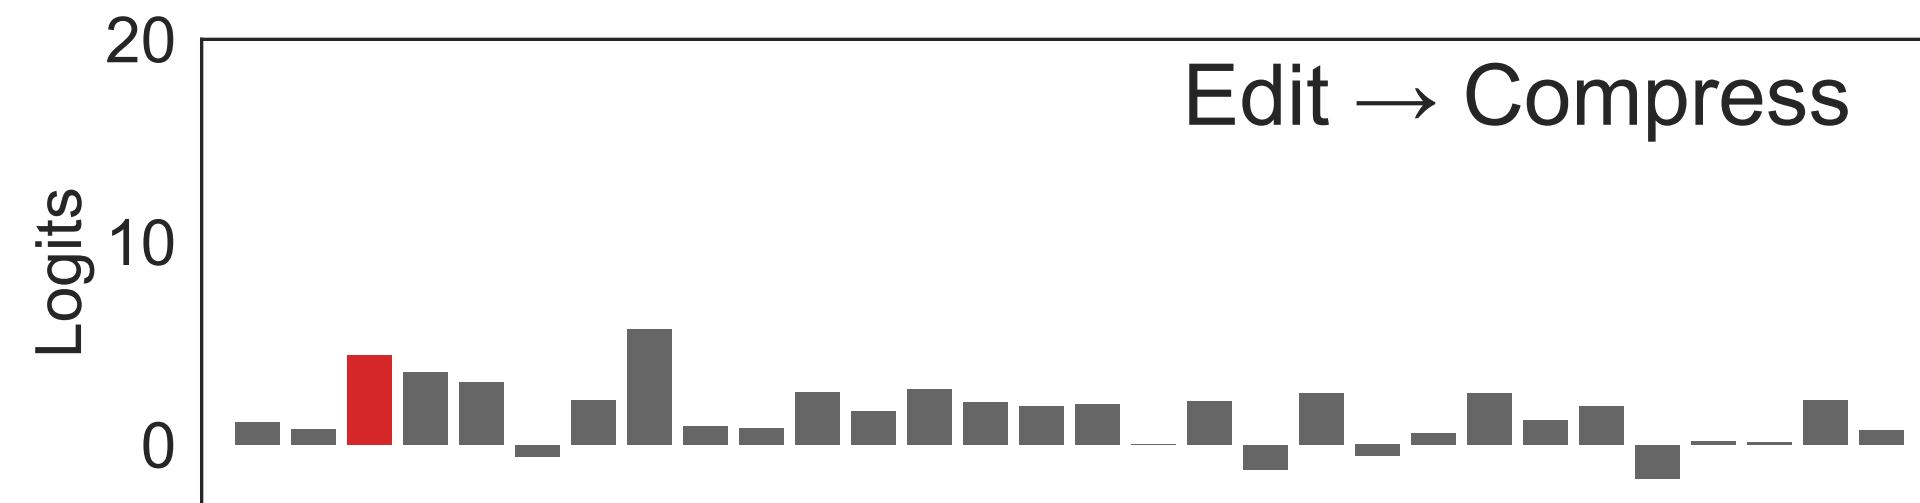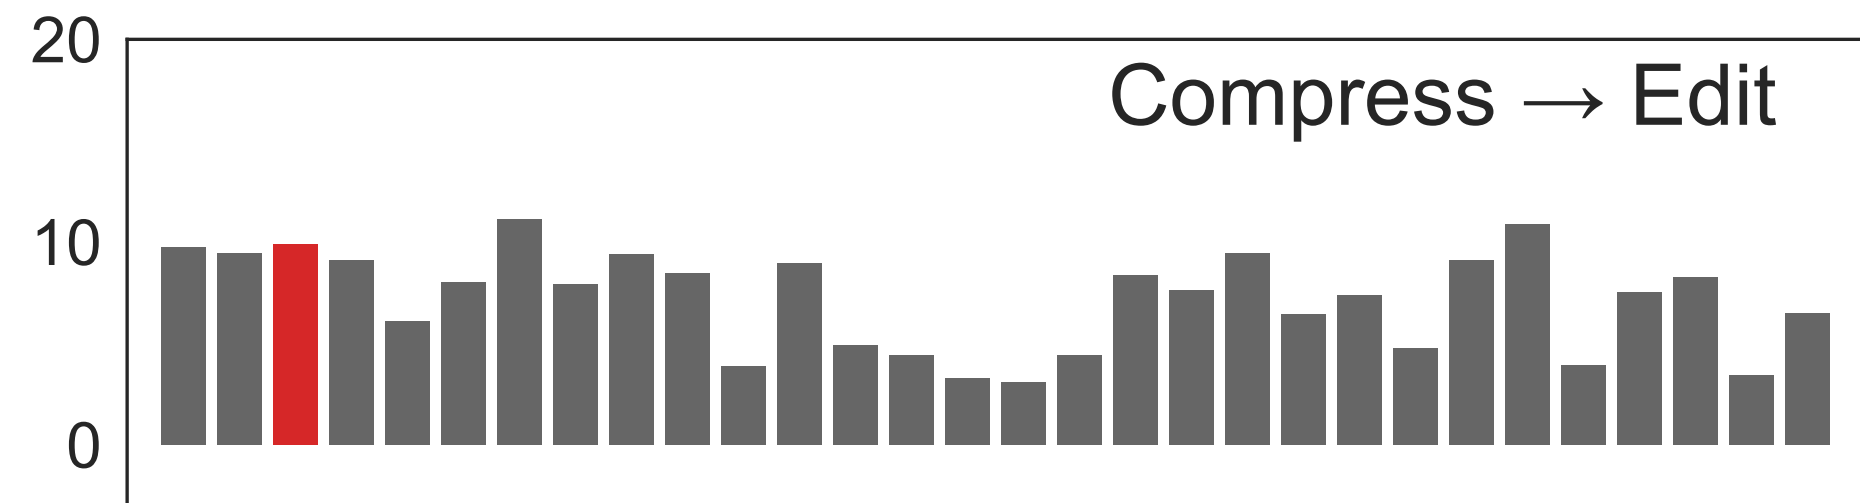

Supplement: supplementary_material [file attachment]

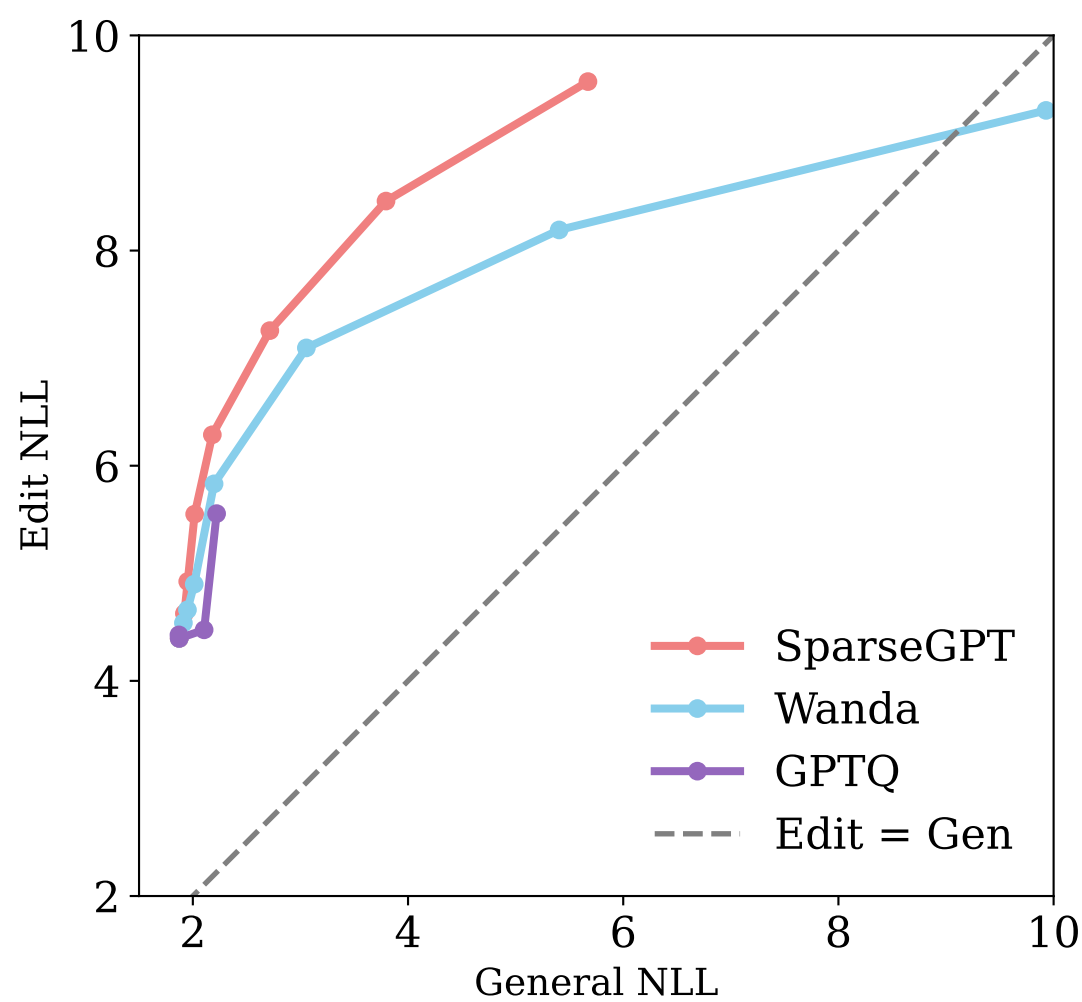

Supplement: supplementary_material [file attachment]

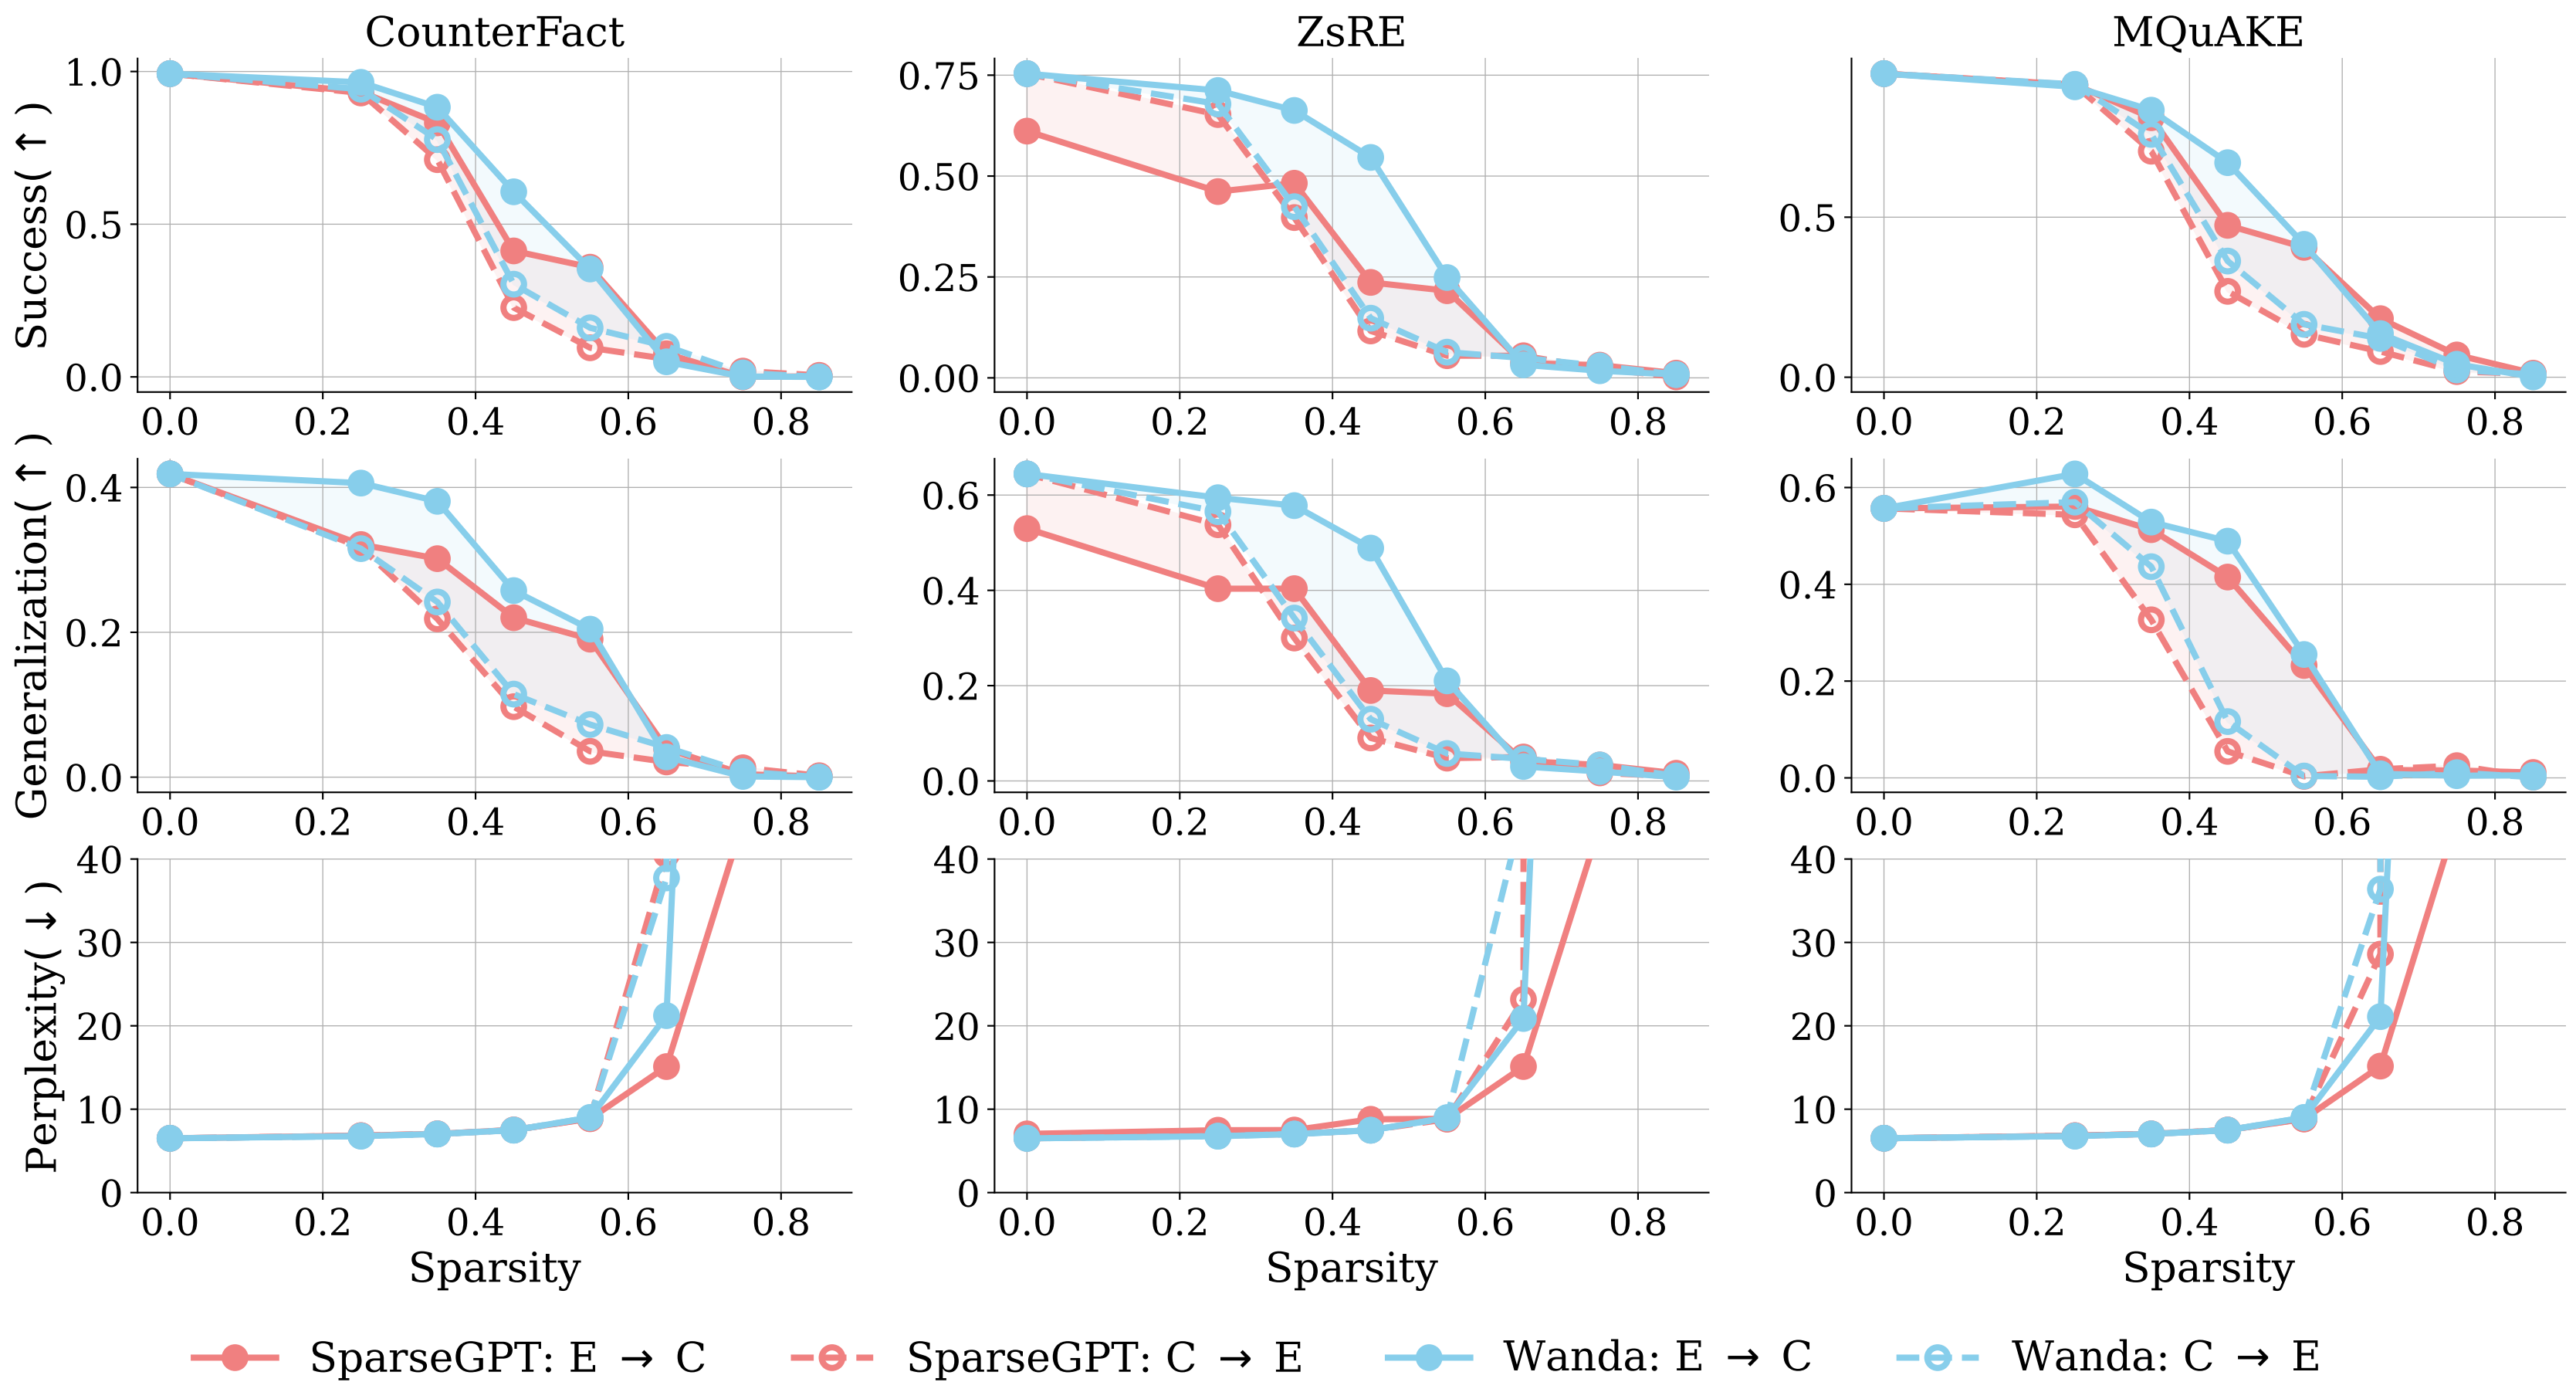

Supplement: supplementary_material [file attachment]

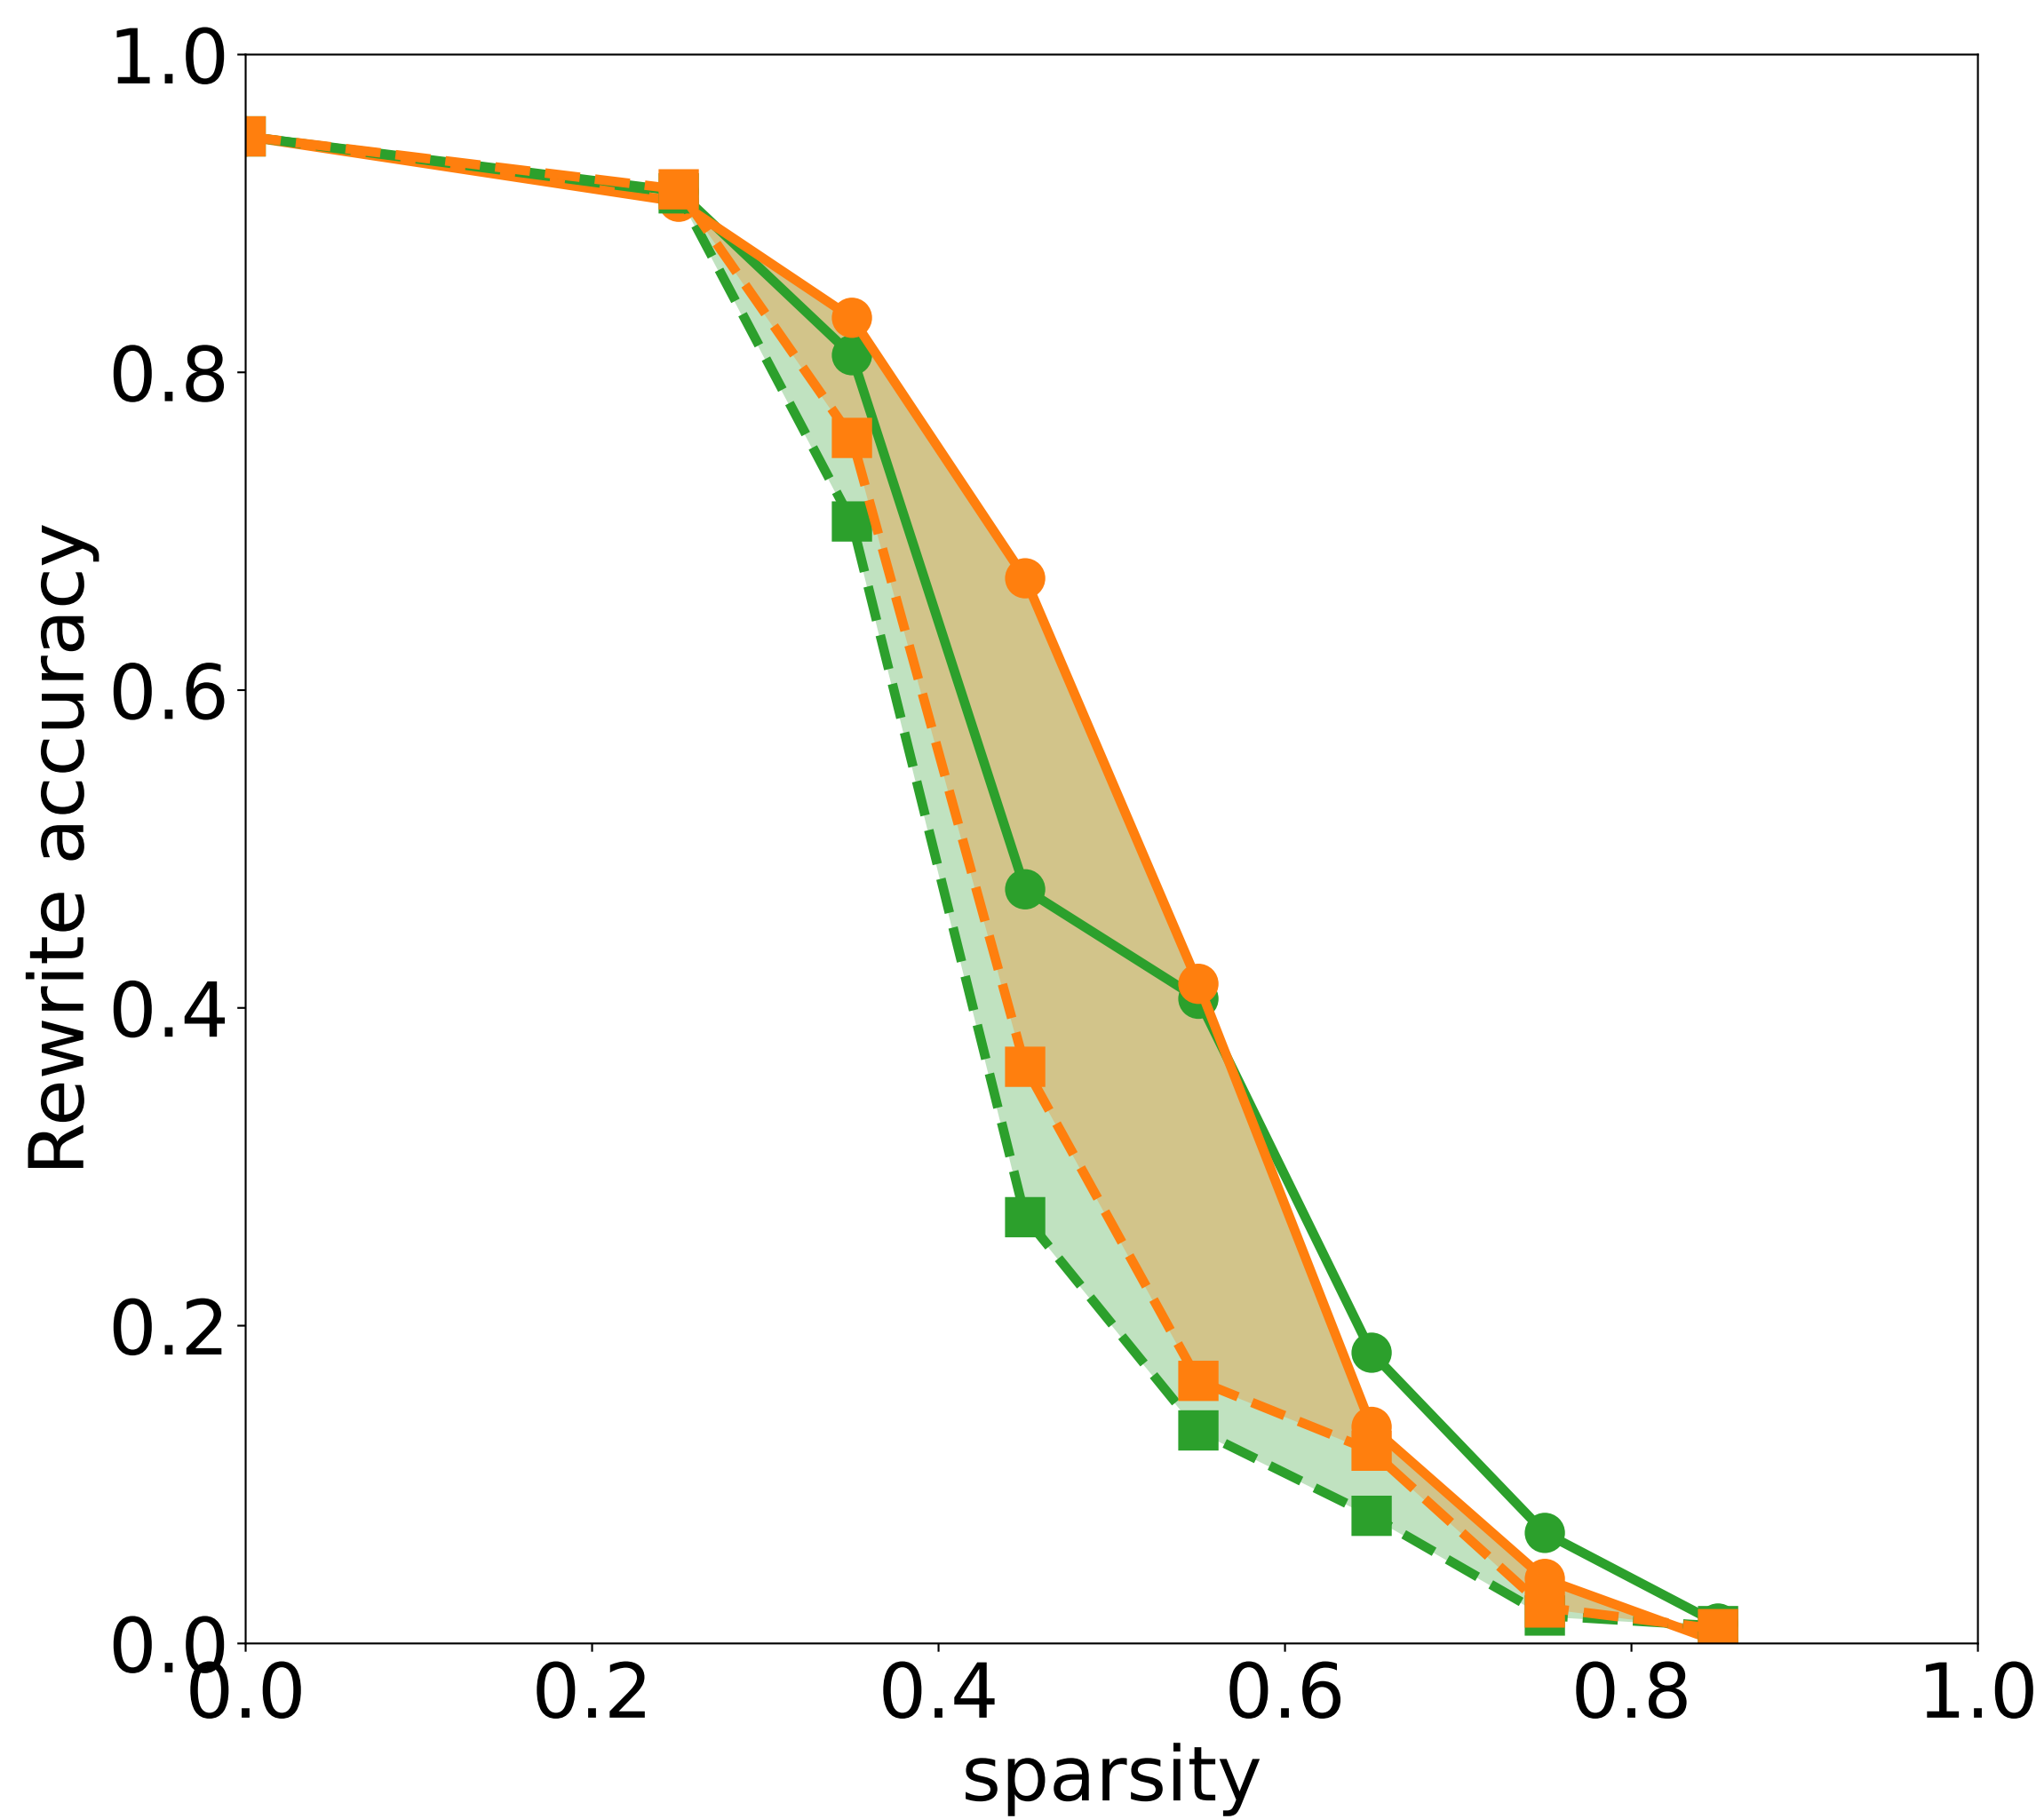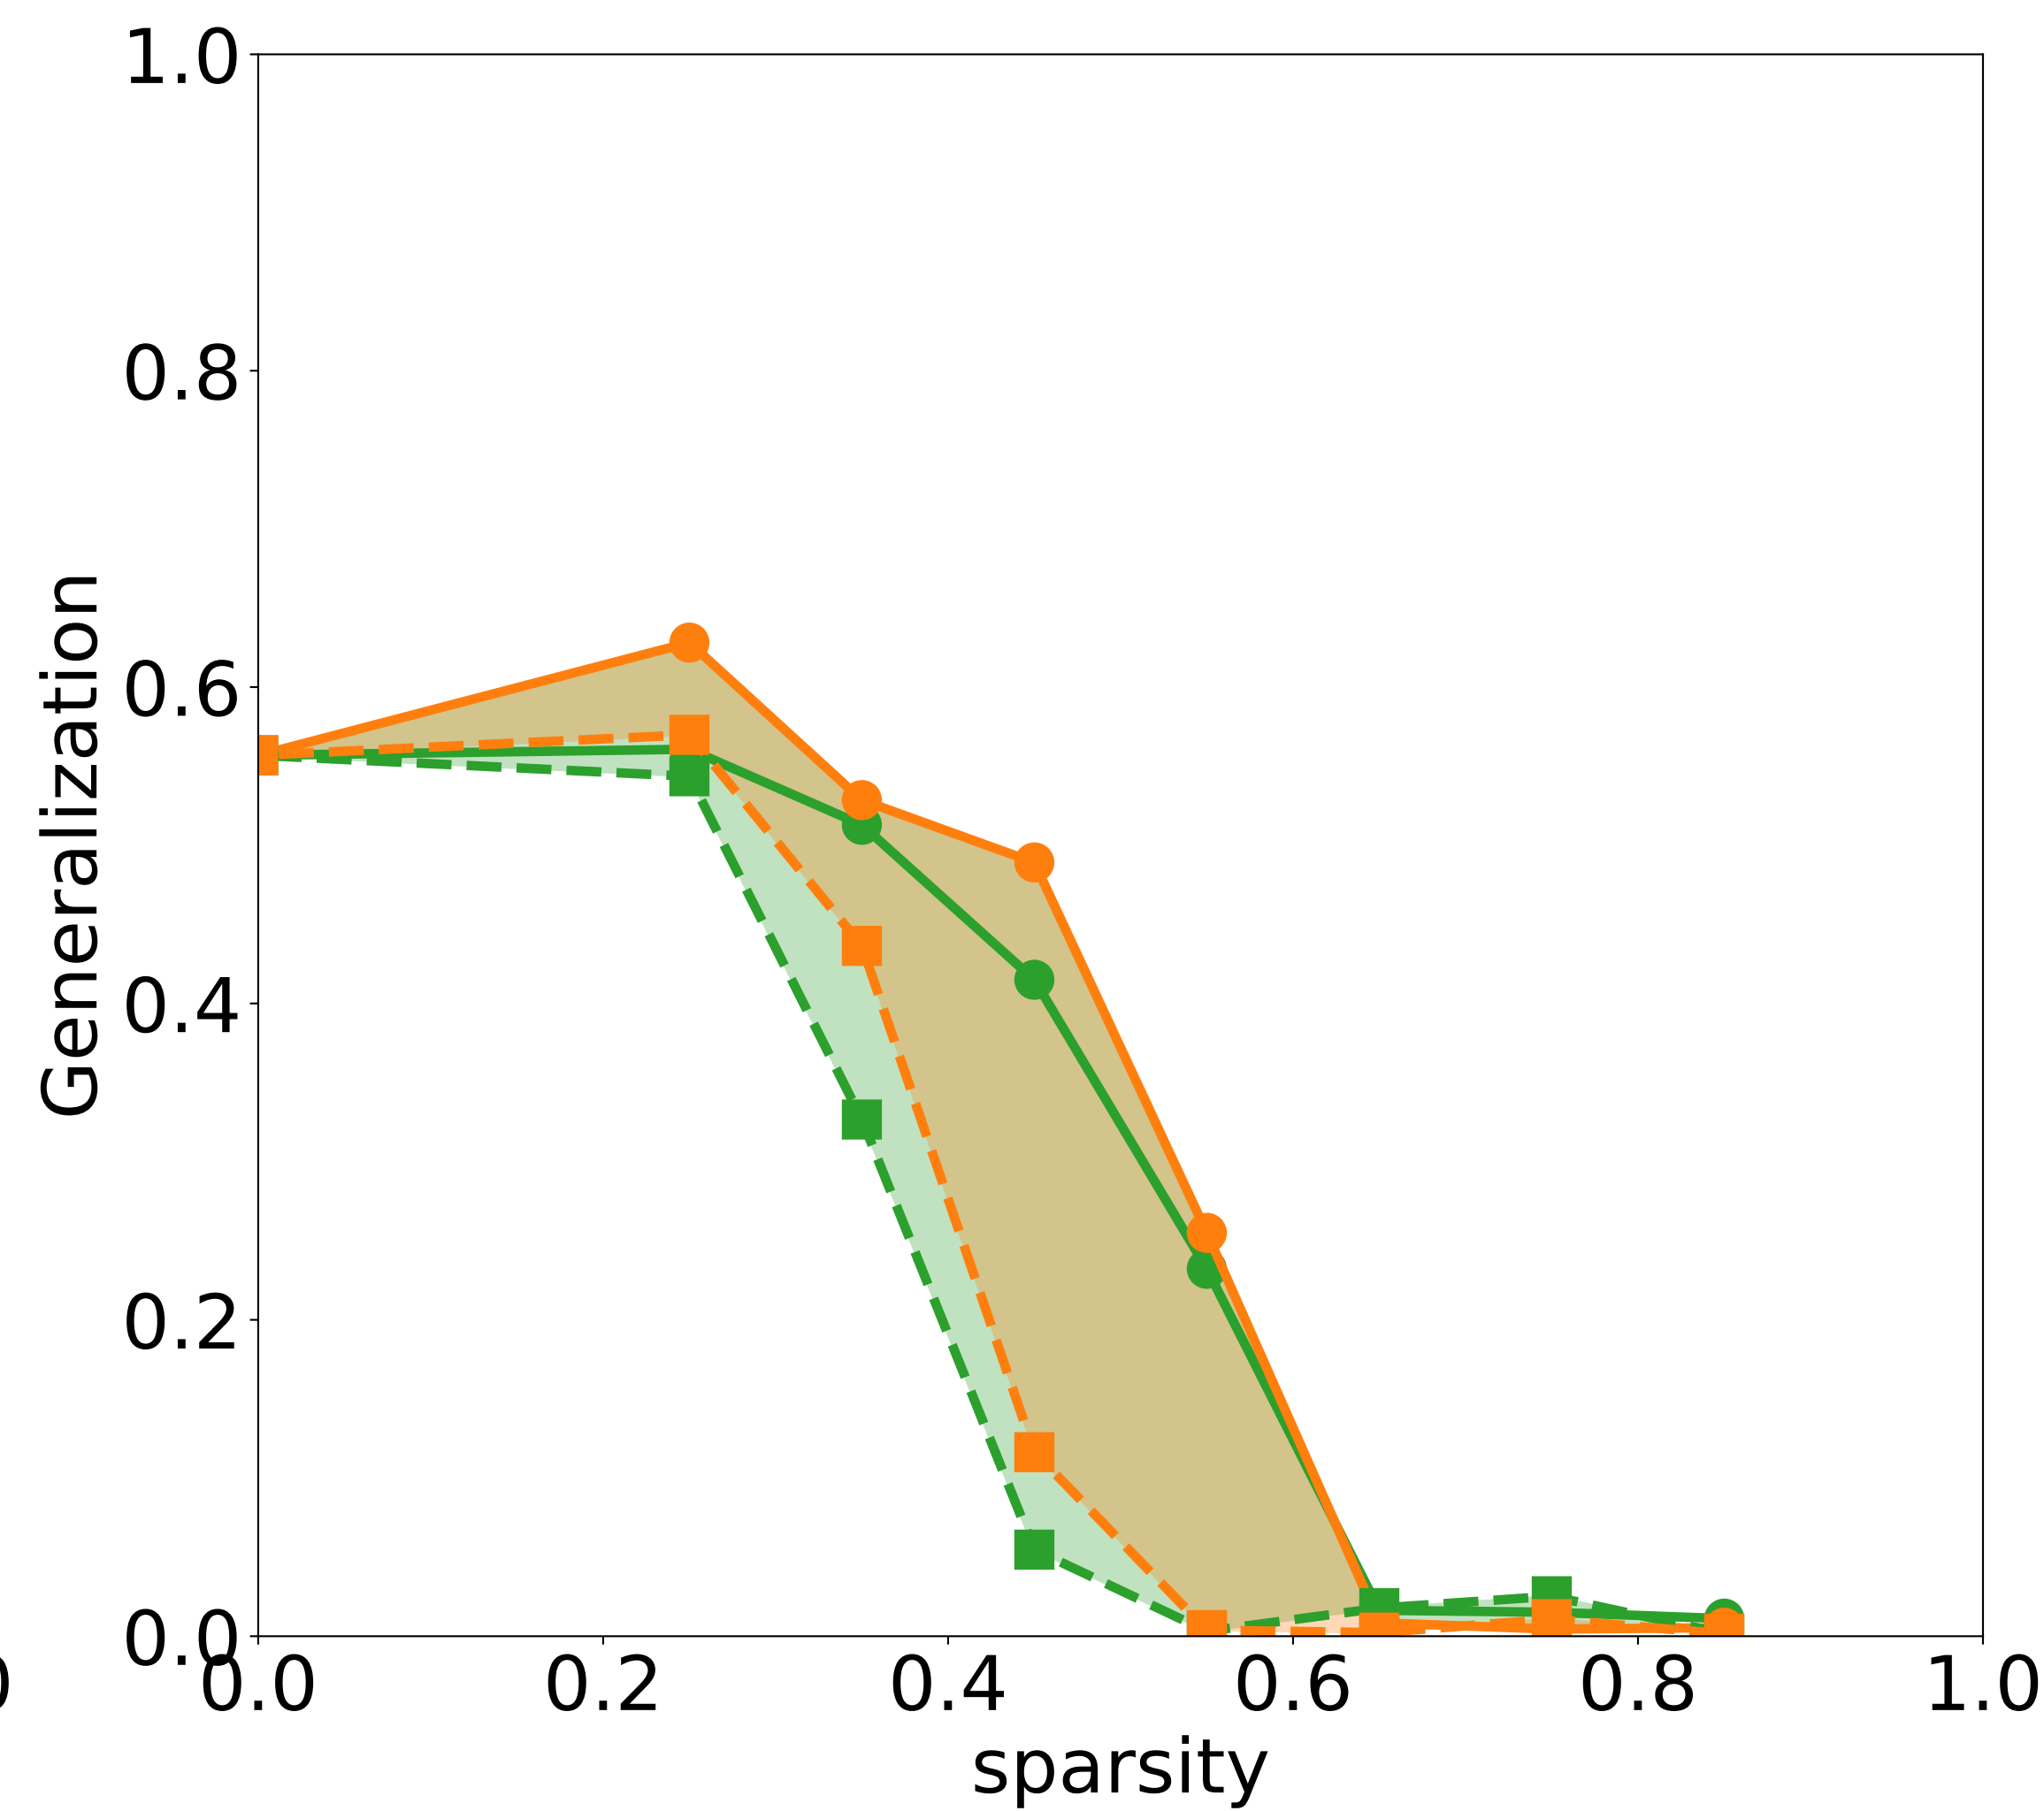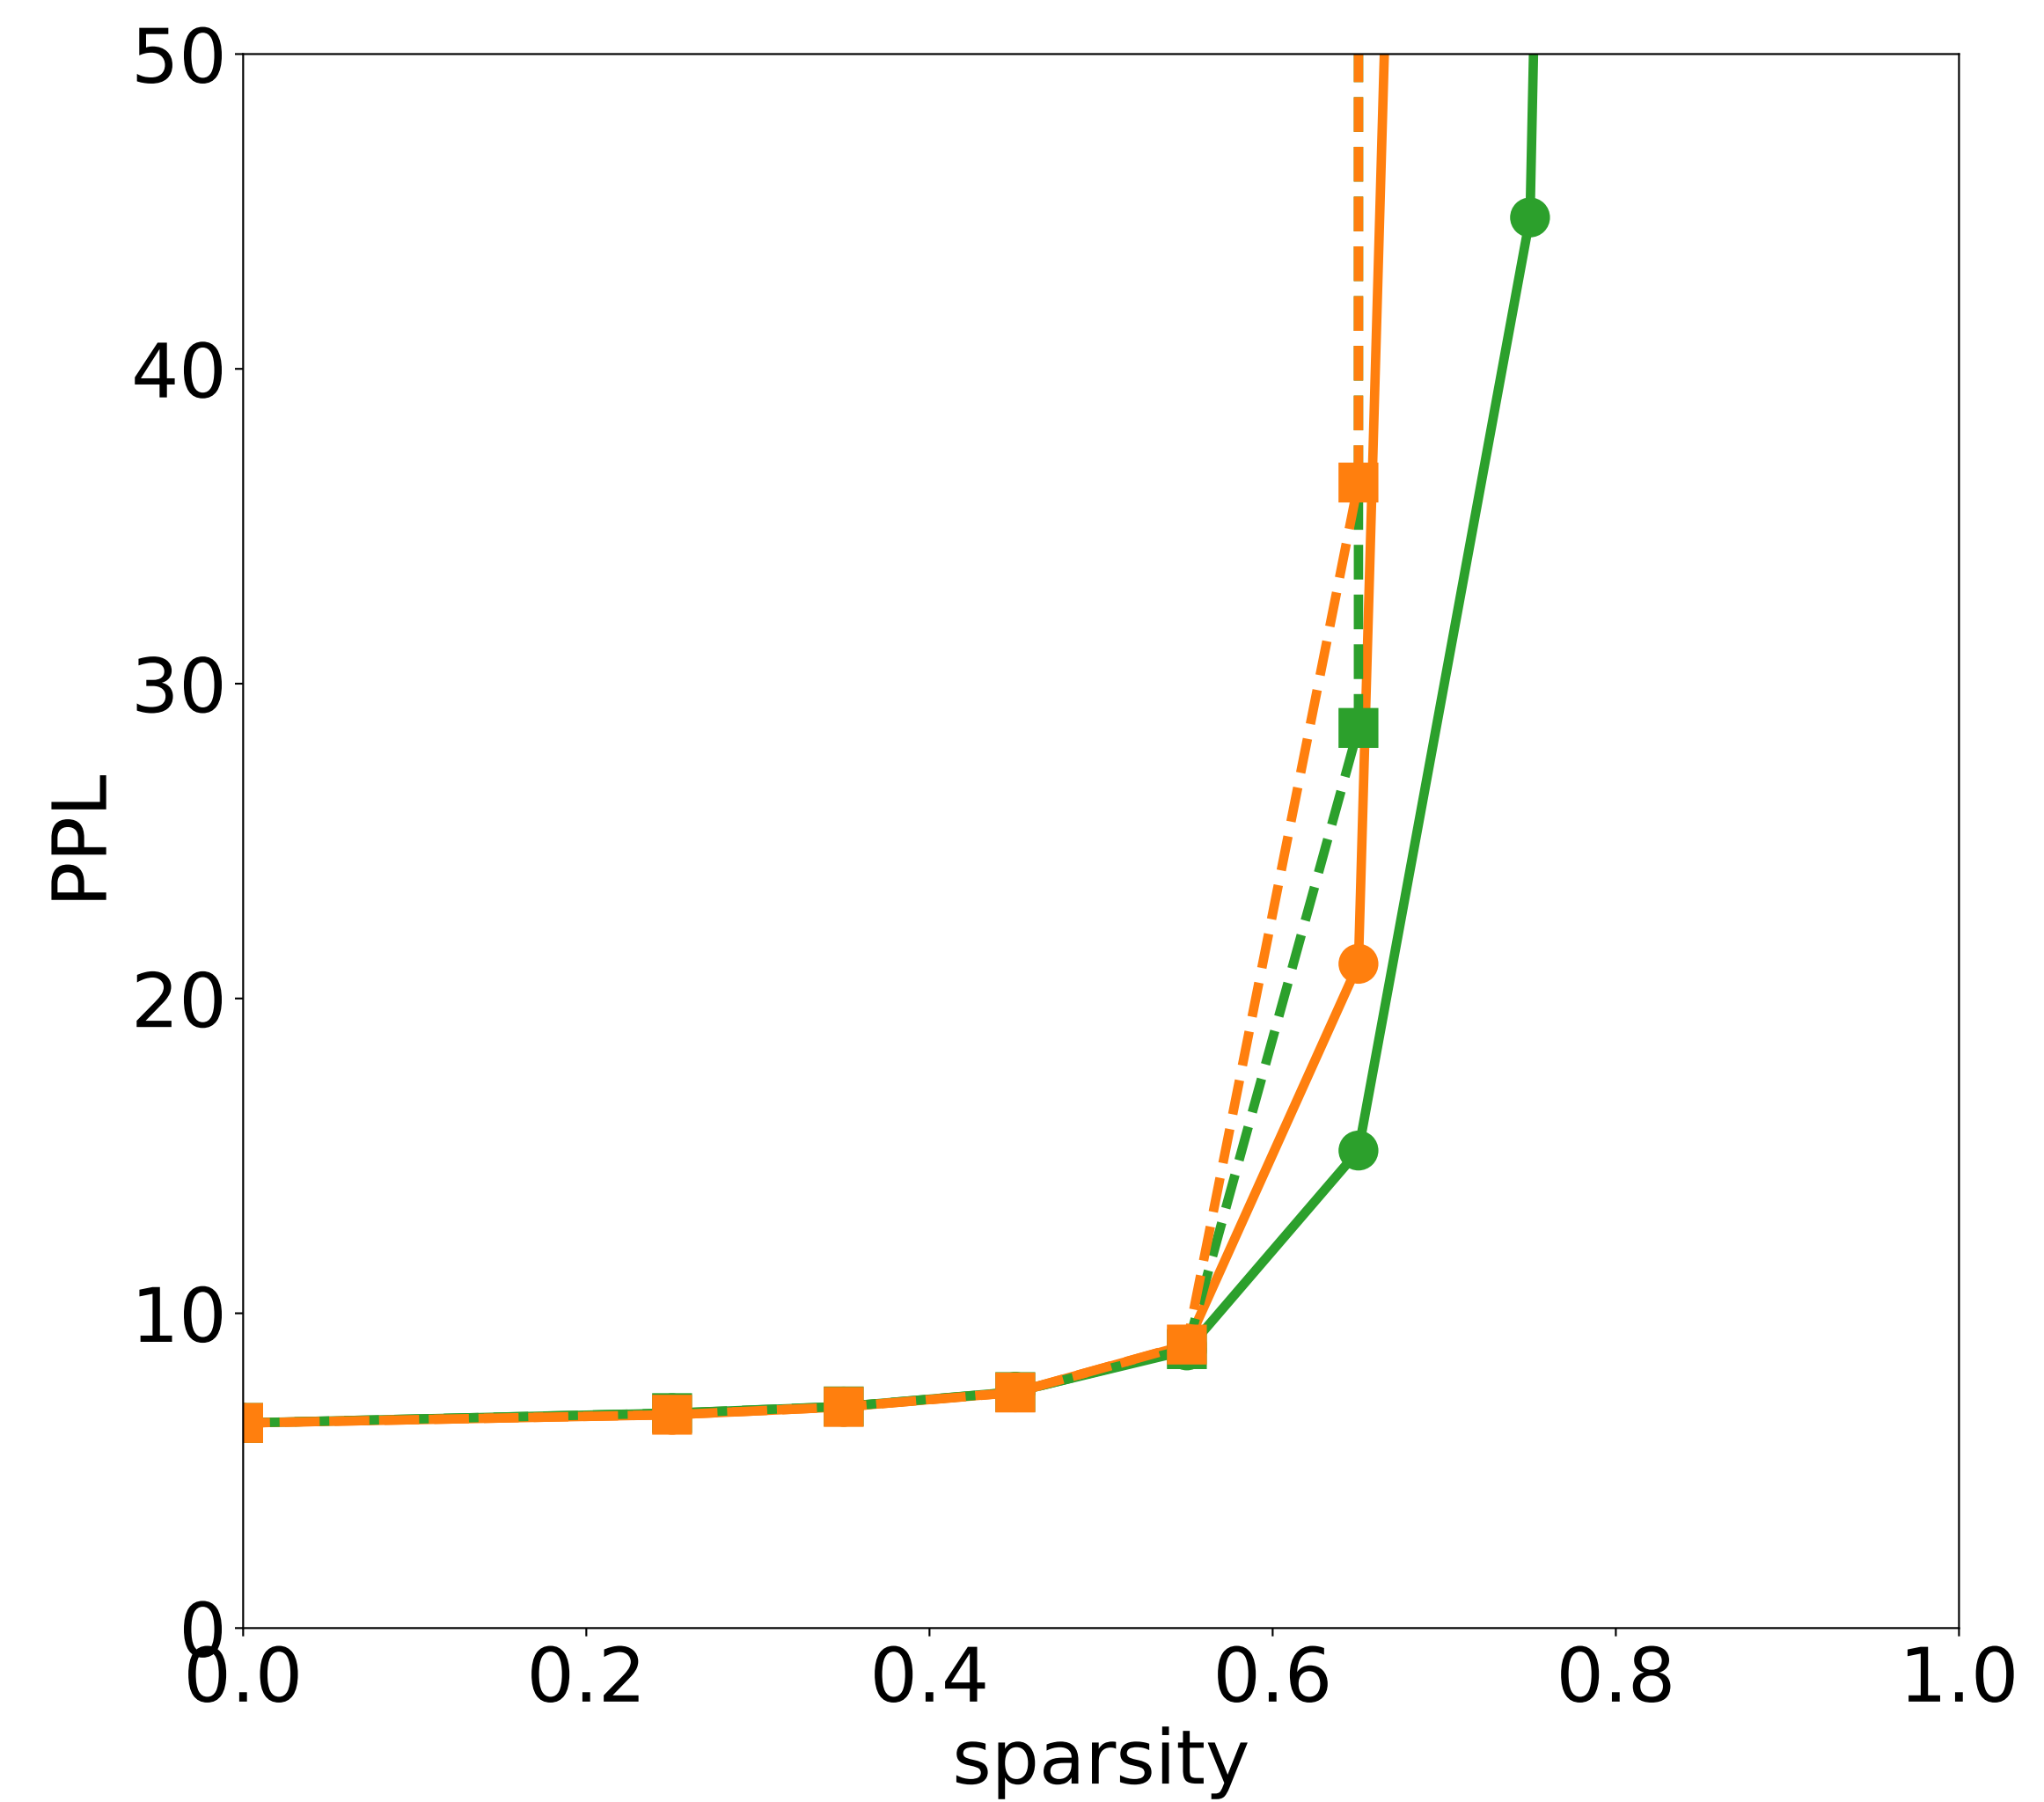

Supplement: supplementary_material [file attachment]

# Weight Pruning

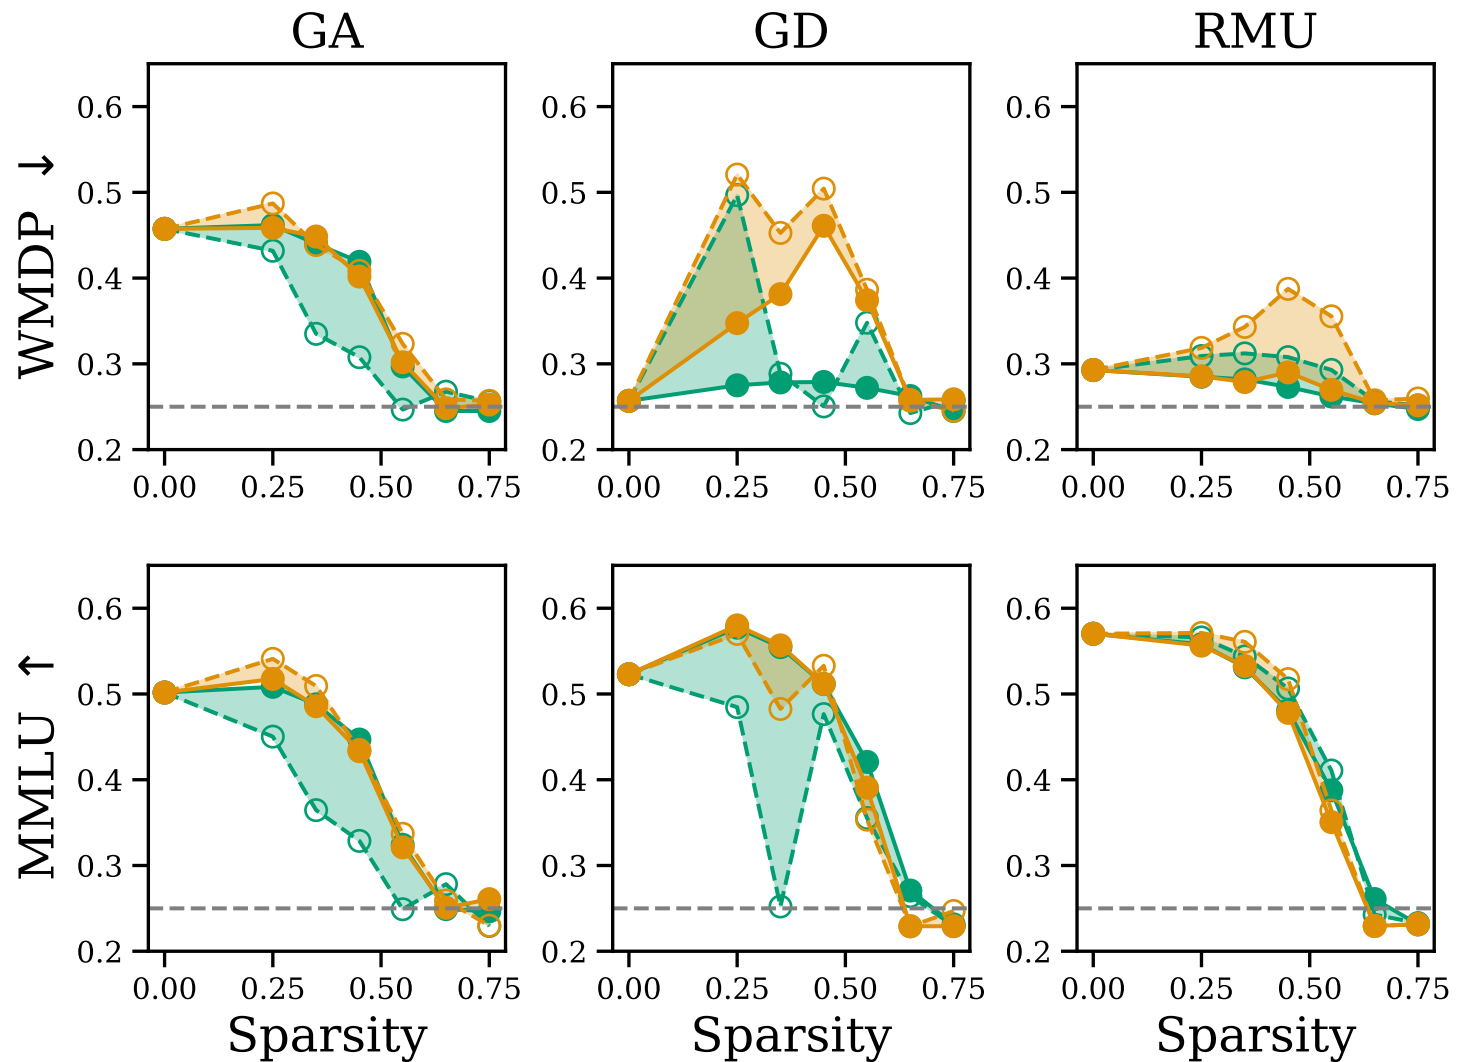

# Quantization

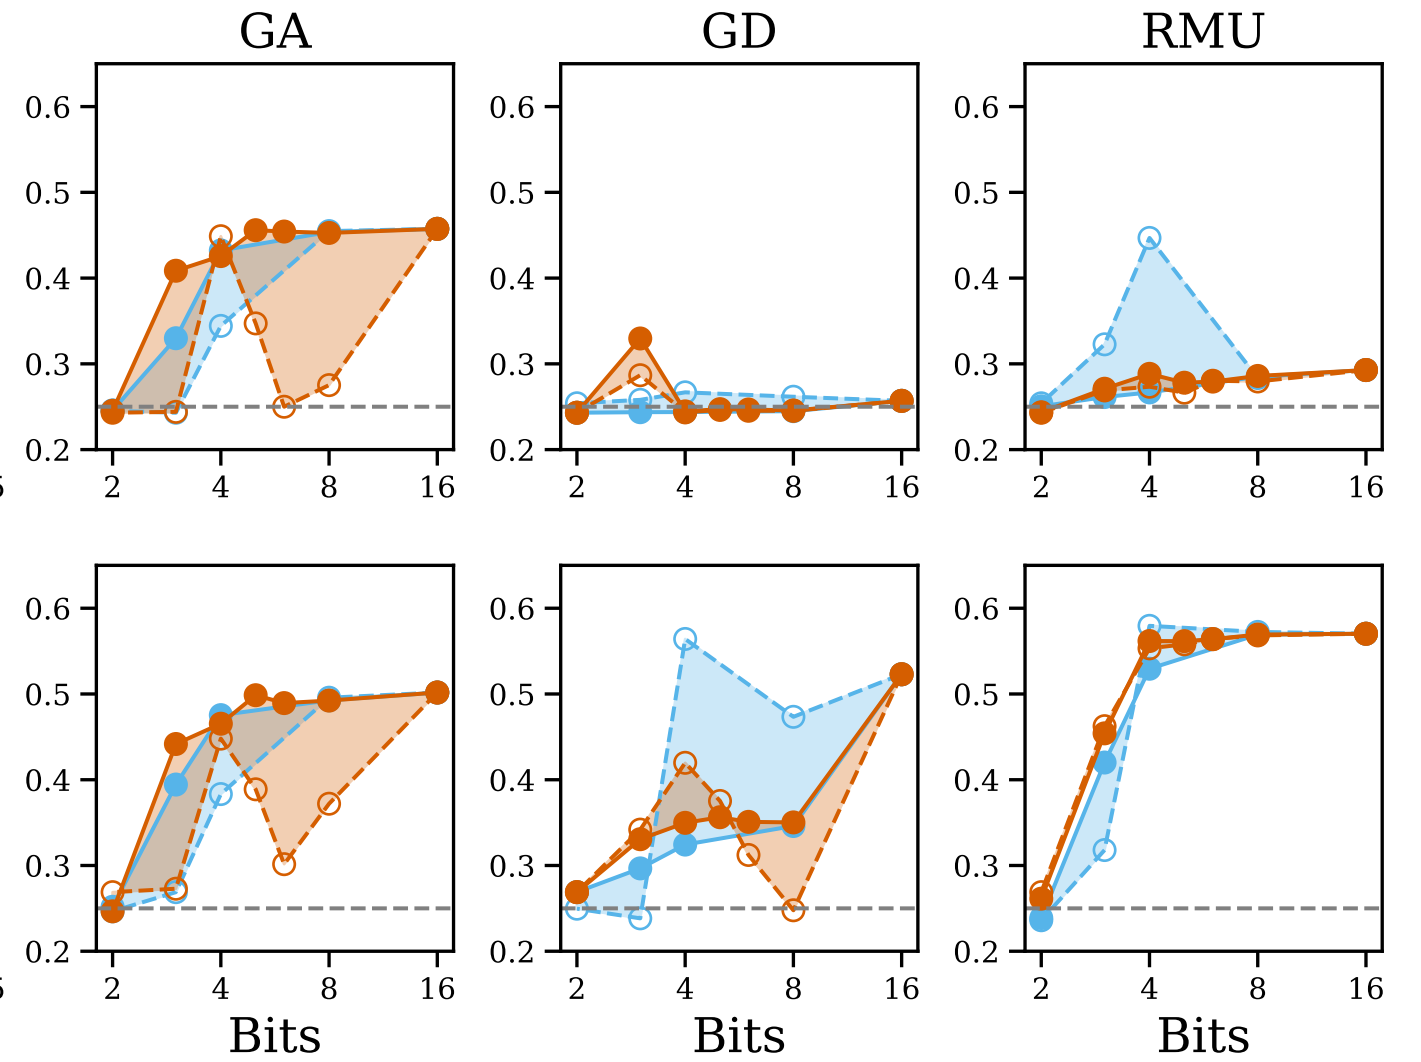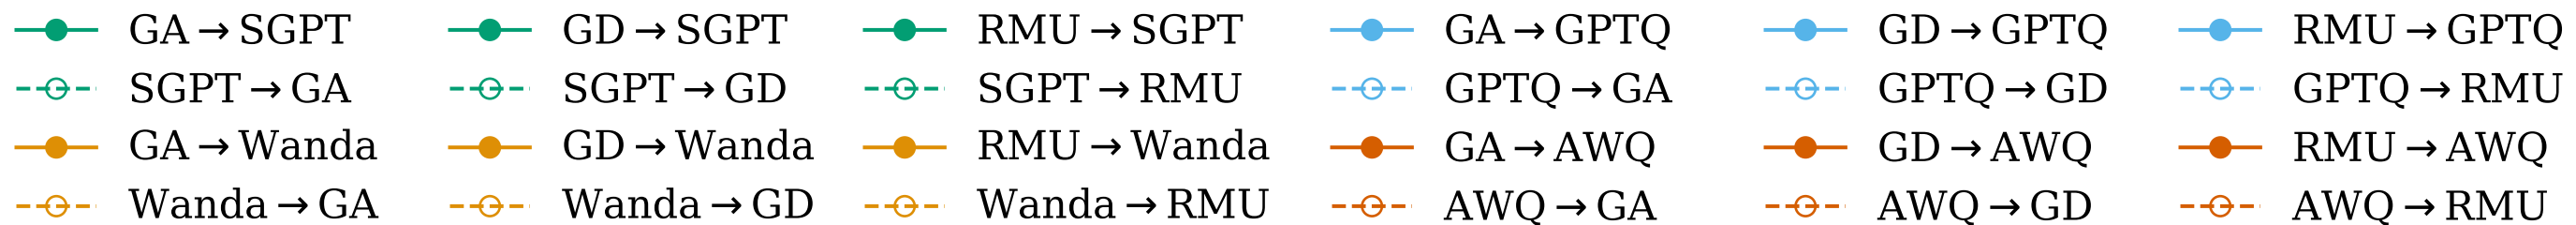

Supplement: supplementary_material [file attachment]

MEMIT

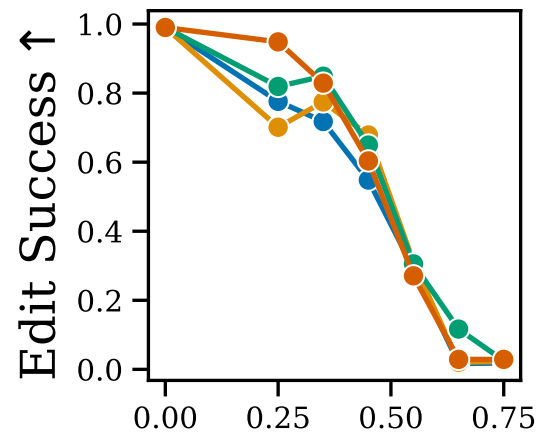

LoRA

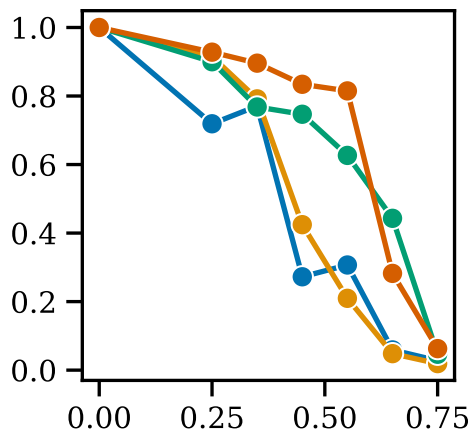

Fine-tune

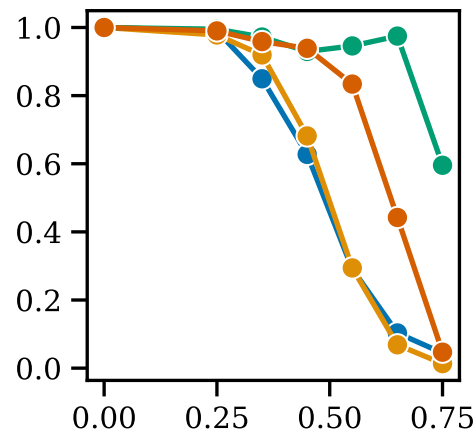

Generalization ↑

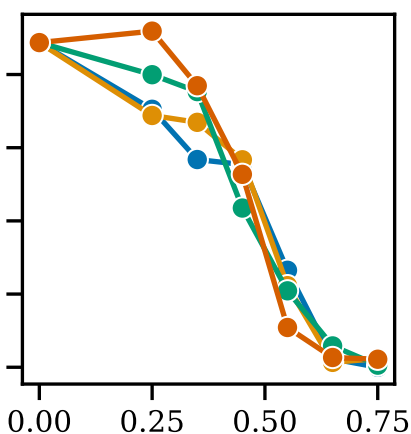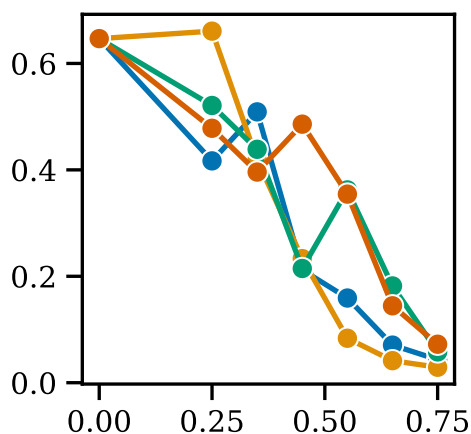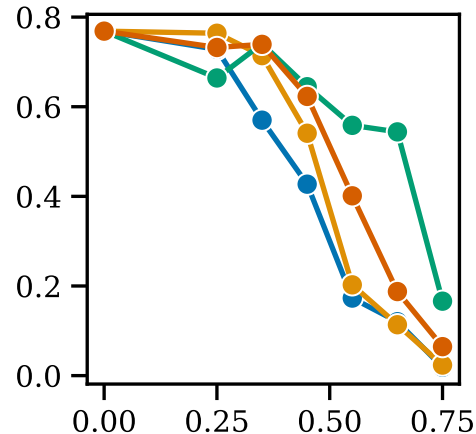

MMLU ↑

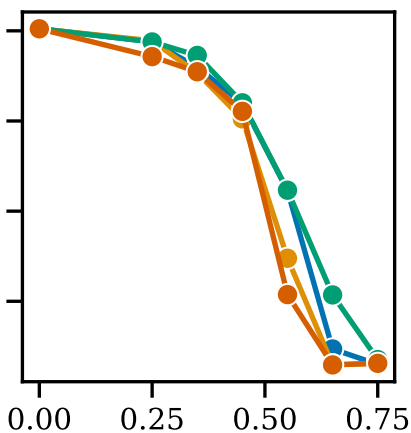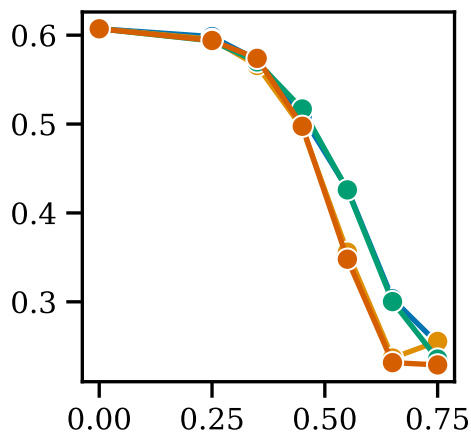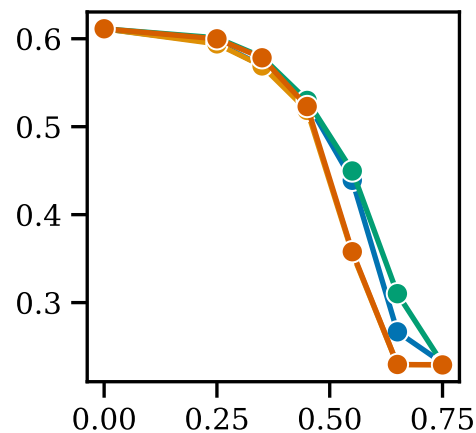

Sparsity

Sparsity

Sparsity

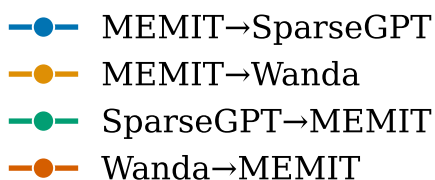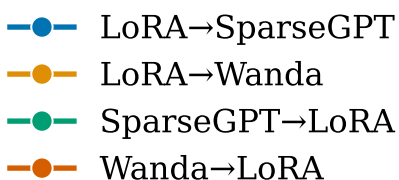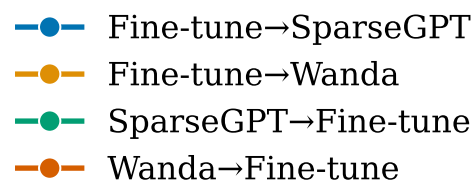

Supplement: supplementary_material [file attachment]

Layer 3

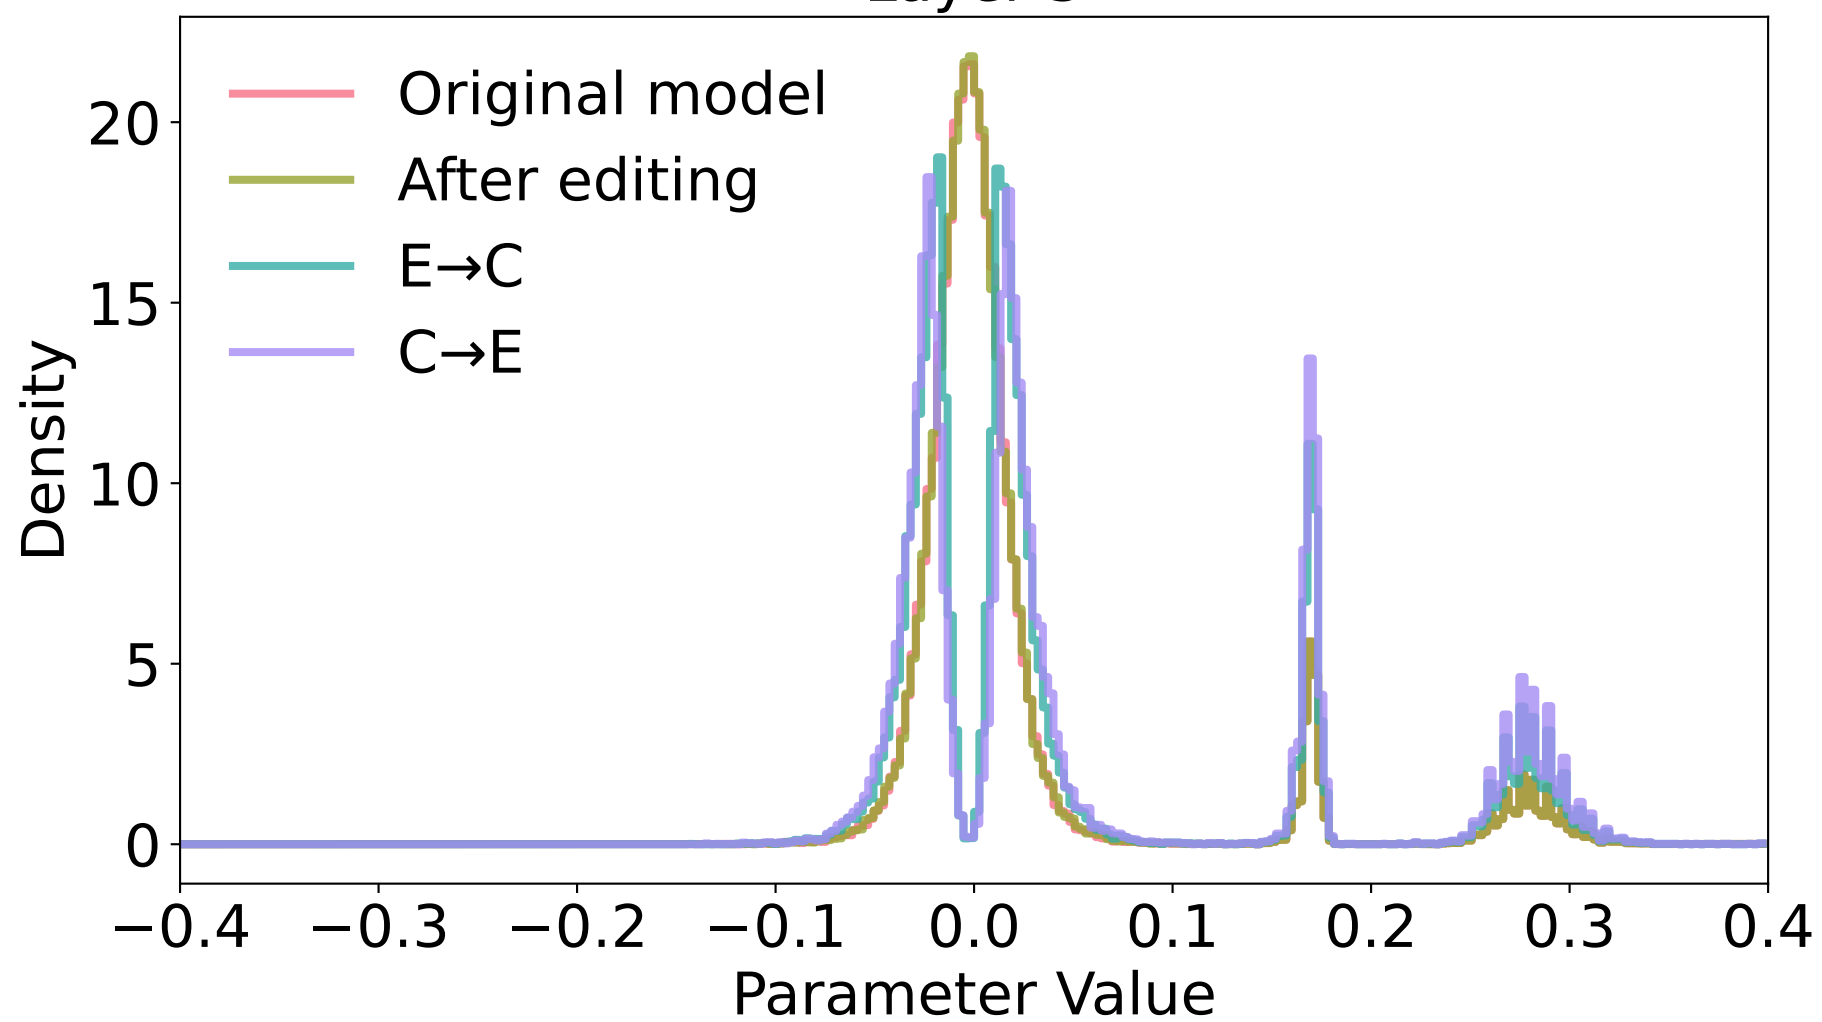

Layer 4

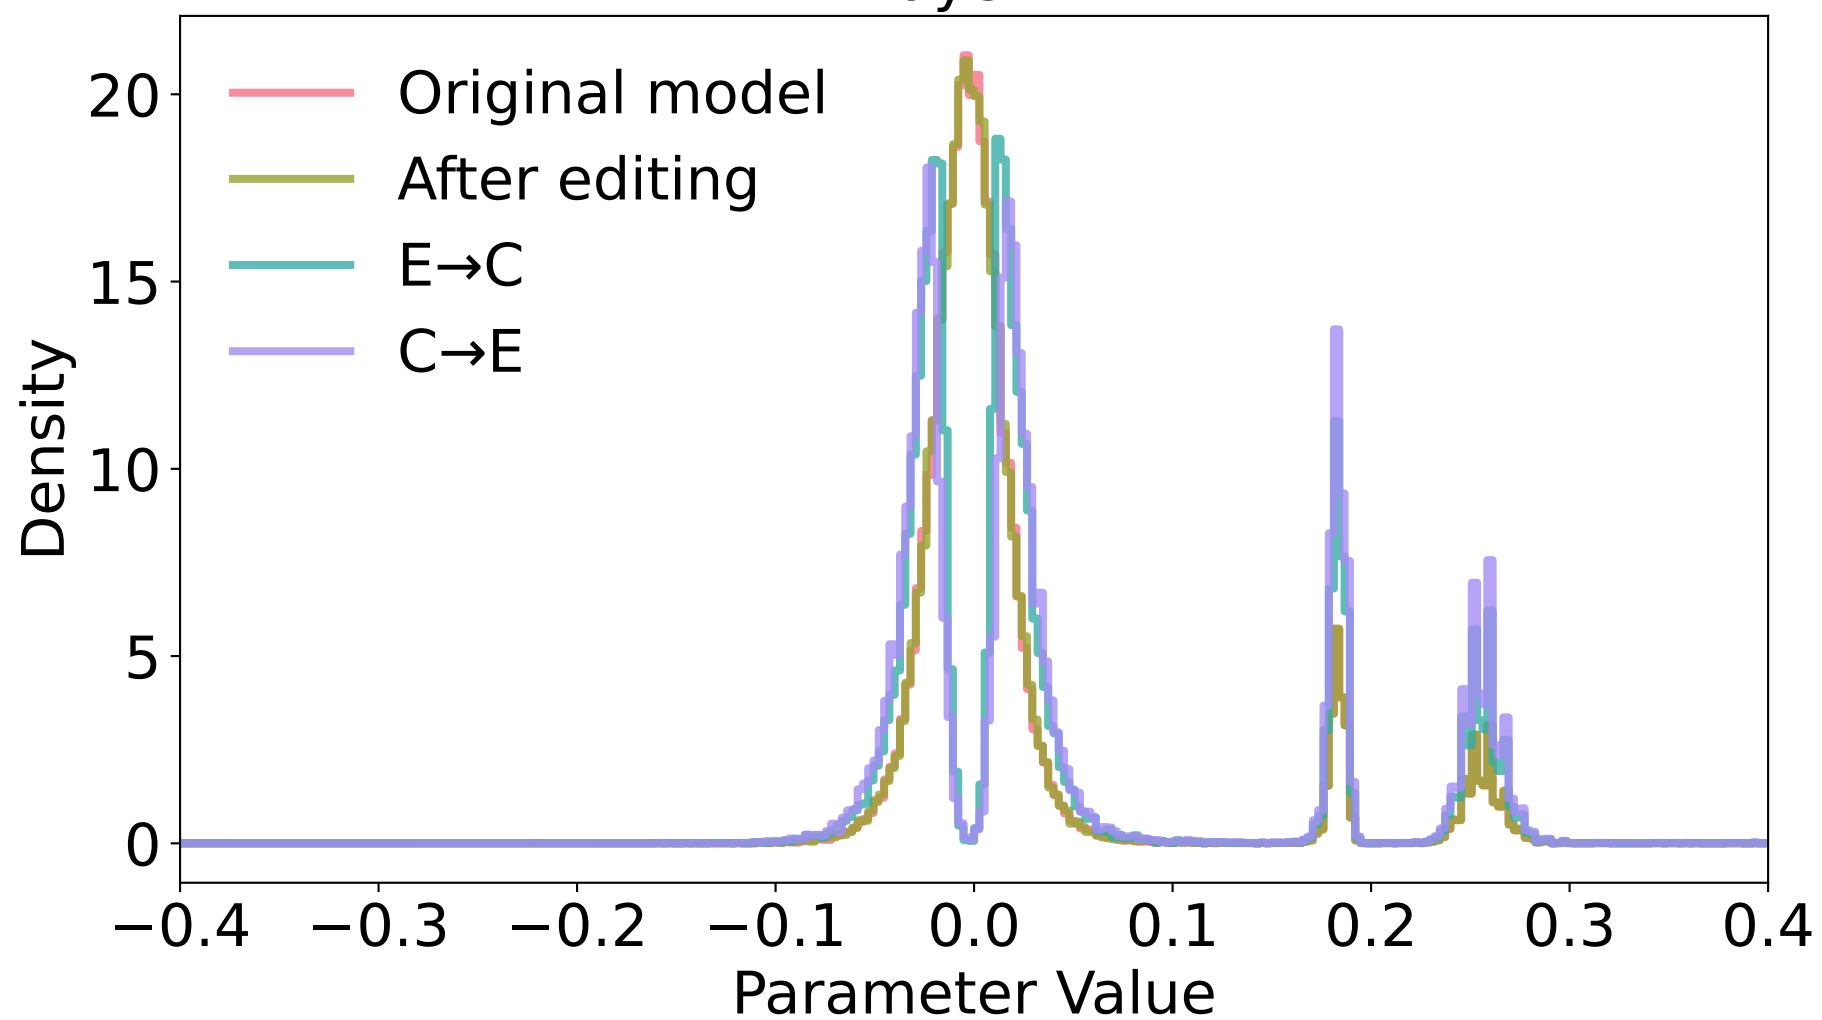

Layer 5

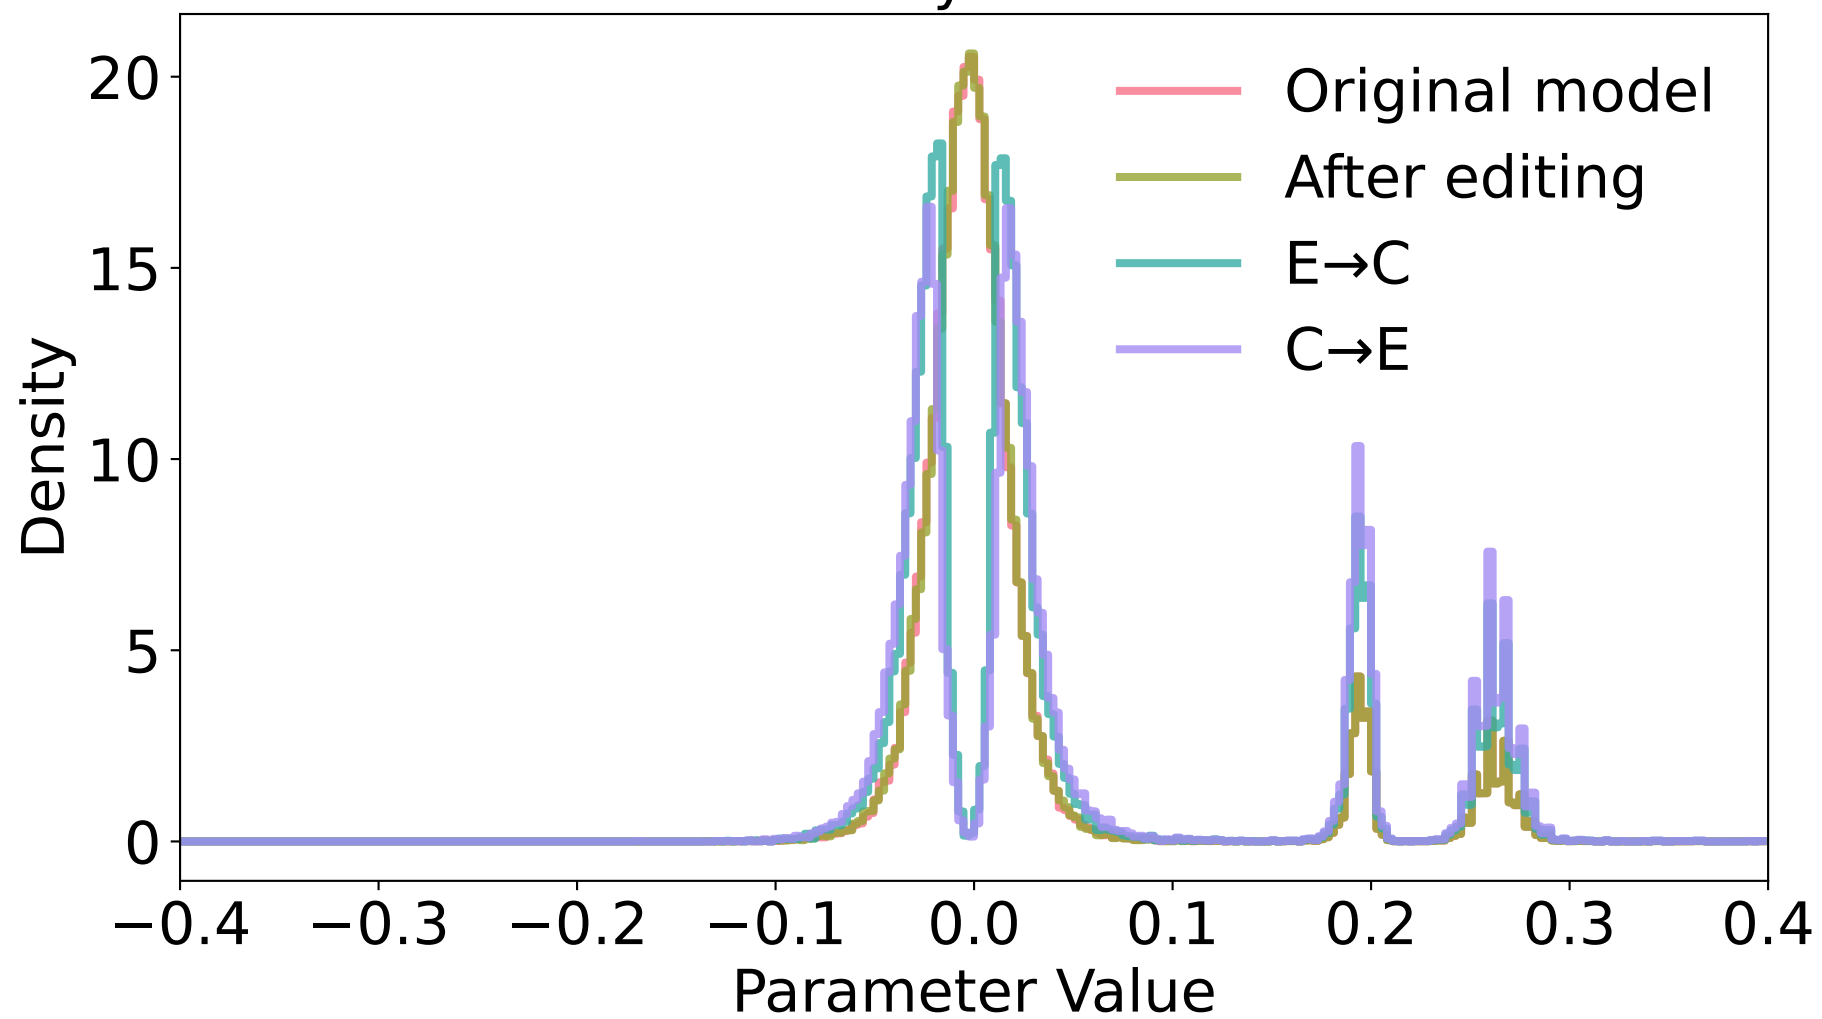

Supplement: supplementary_material [file attachment]

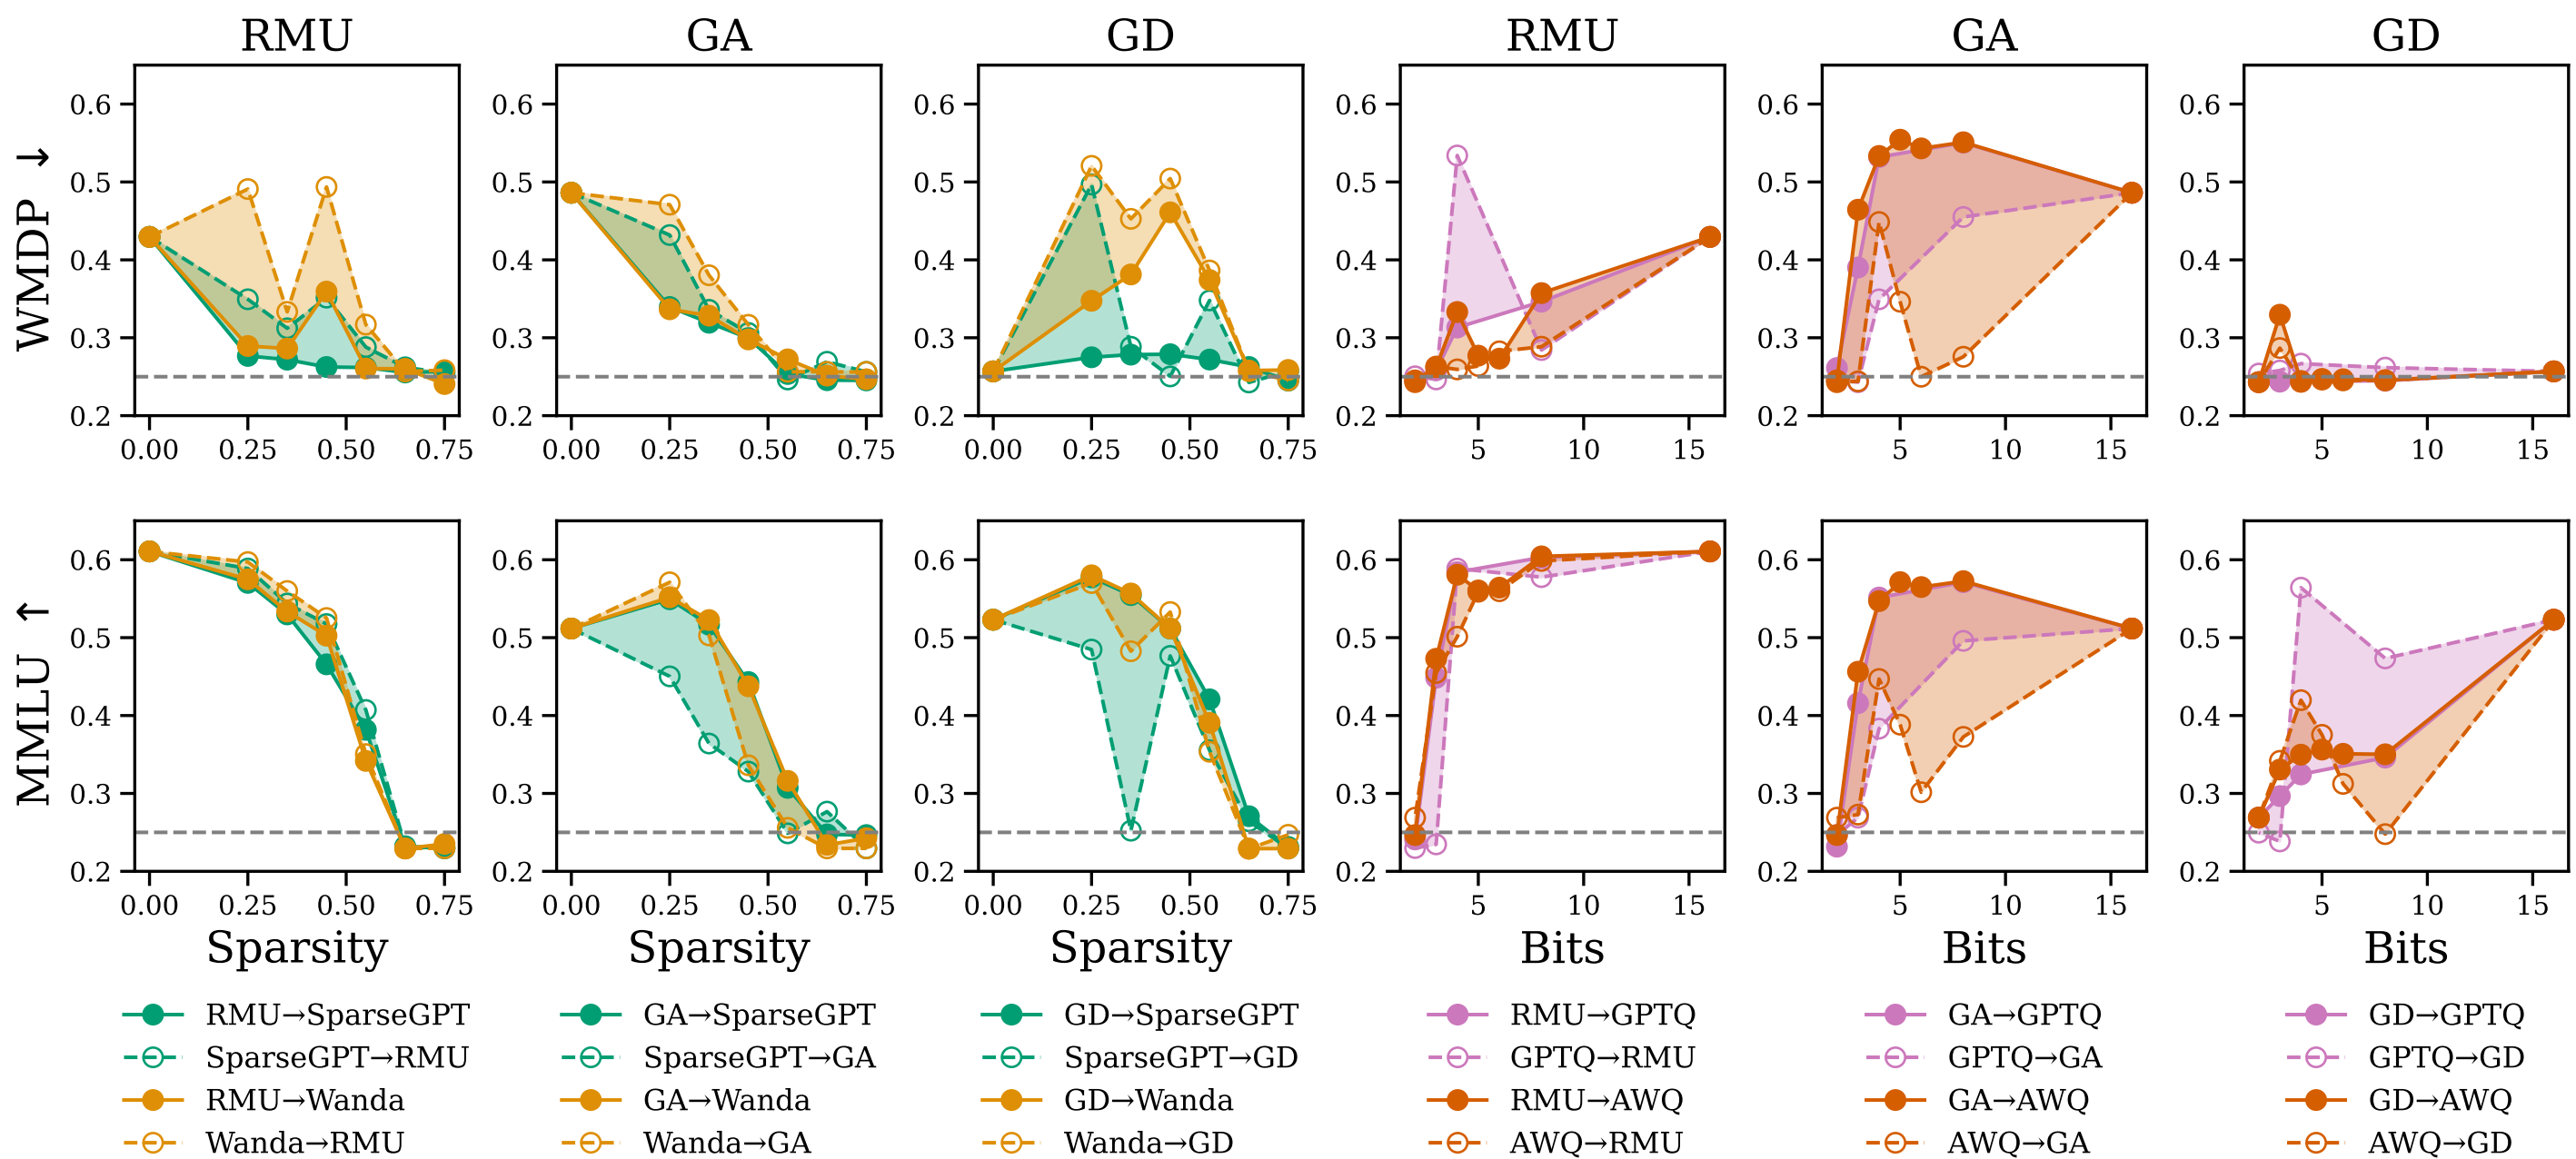

Supplement: supplementary_material [file attachment]

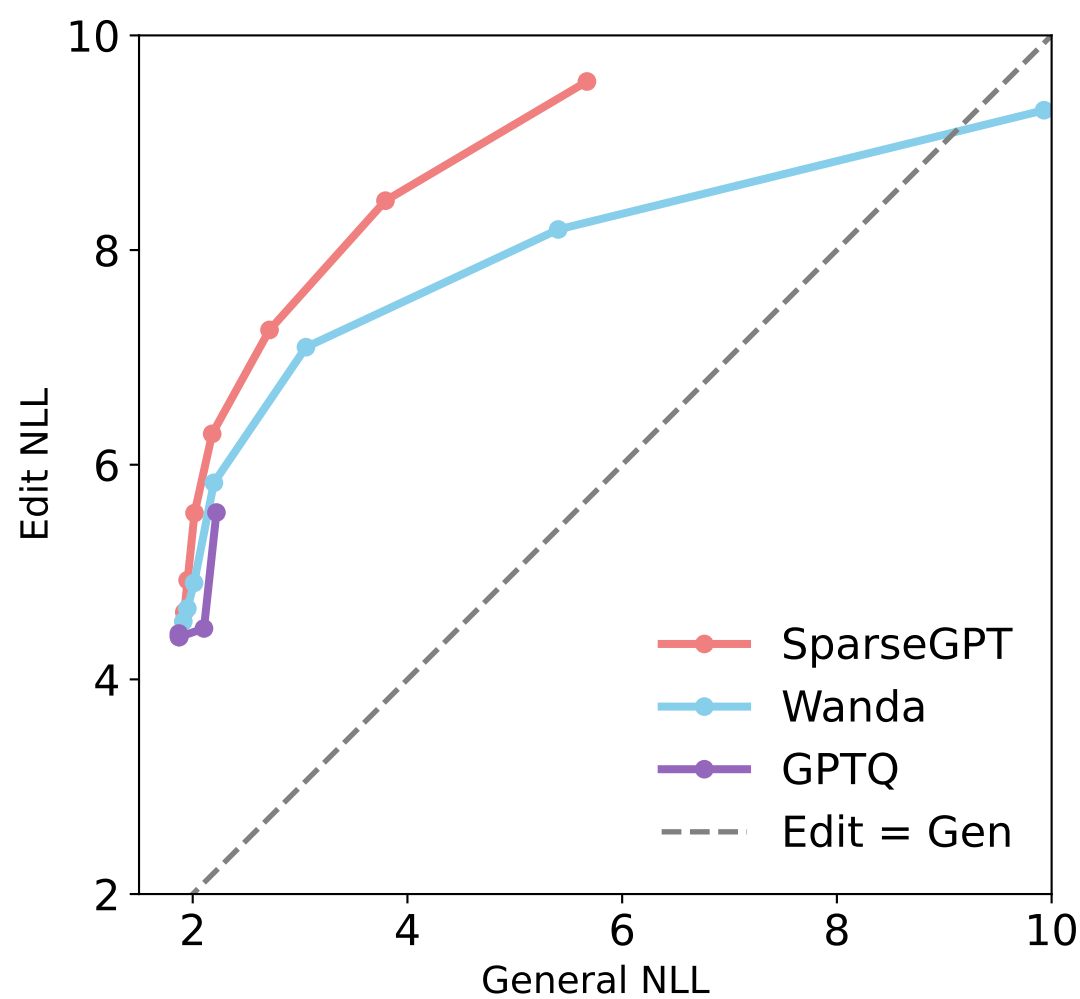

Supplement: supplementary_material [file attachment]

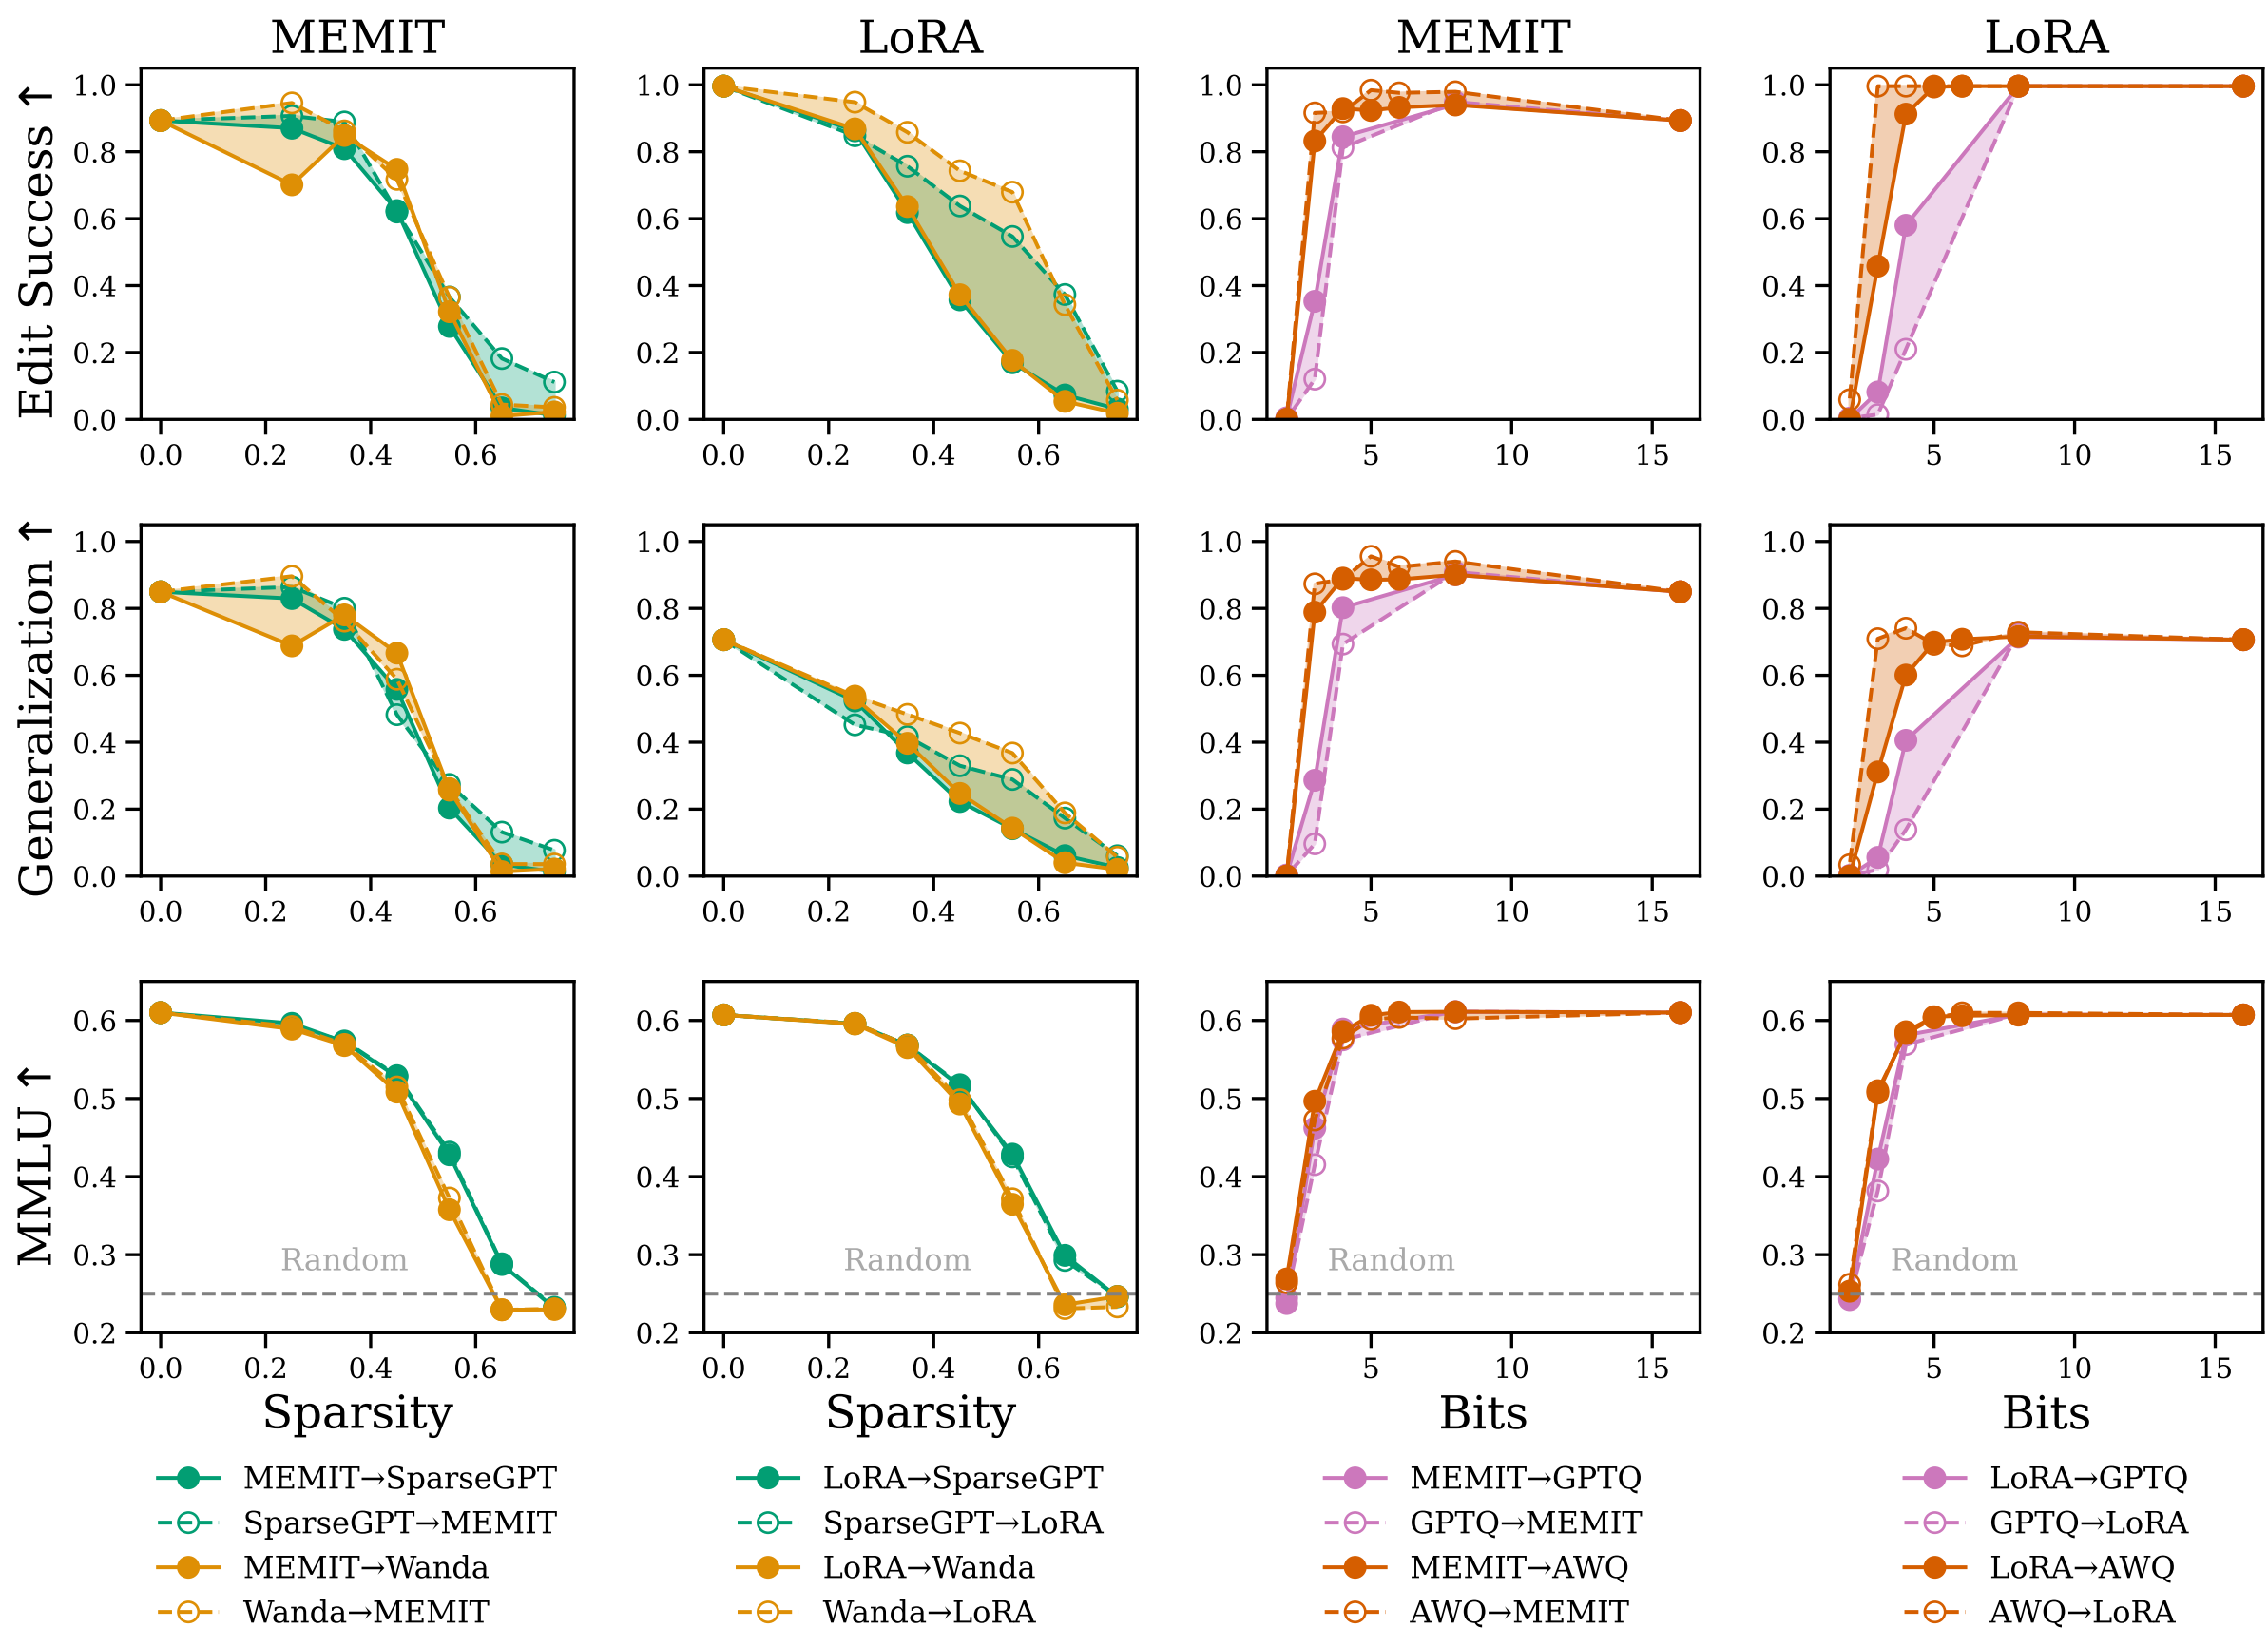

Supplement: supplementary_material [file attachment]

# Weight Pruning

# Quantization

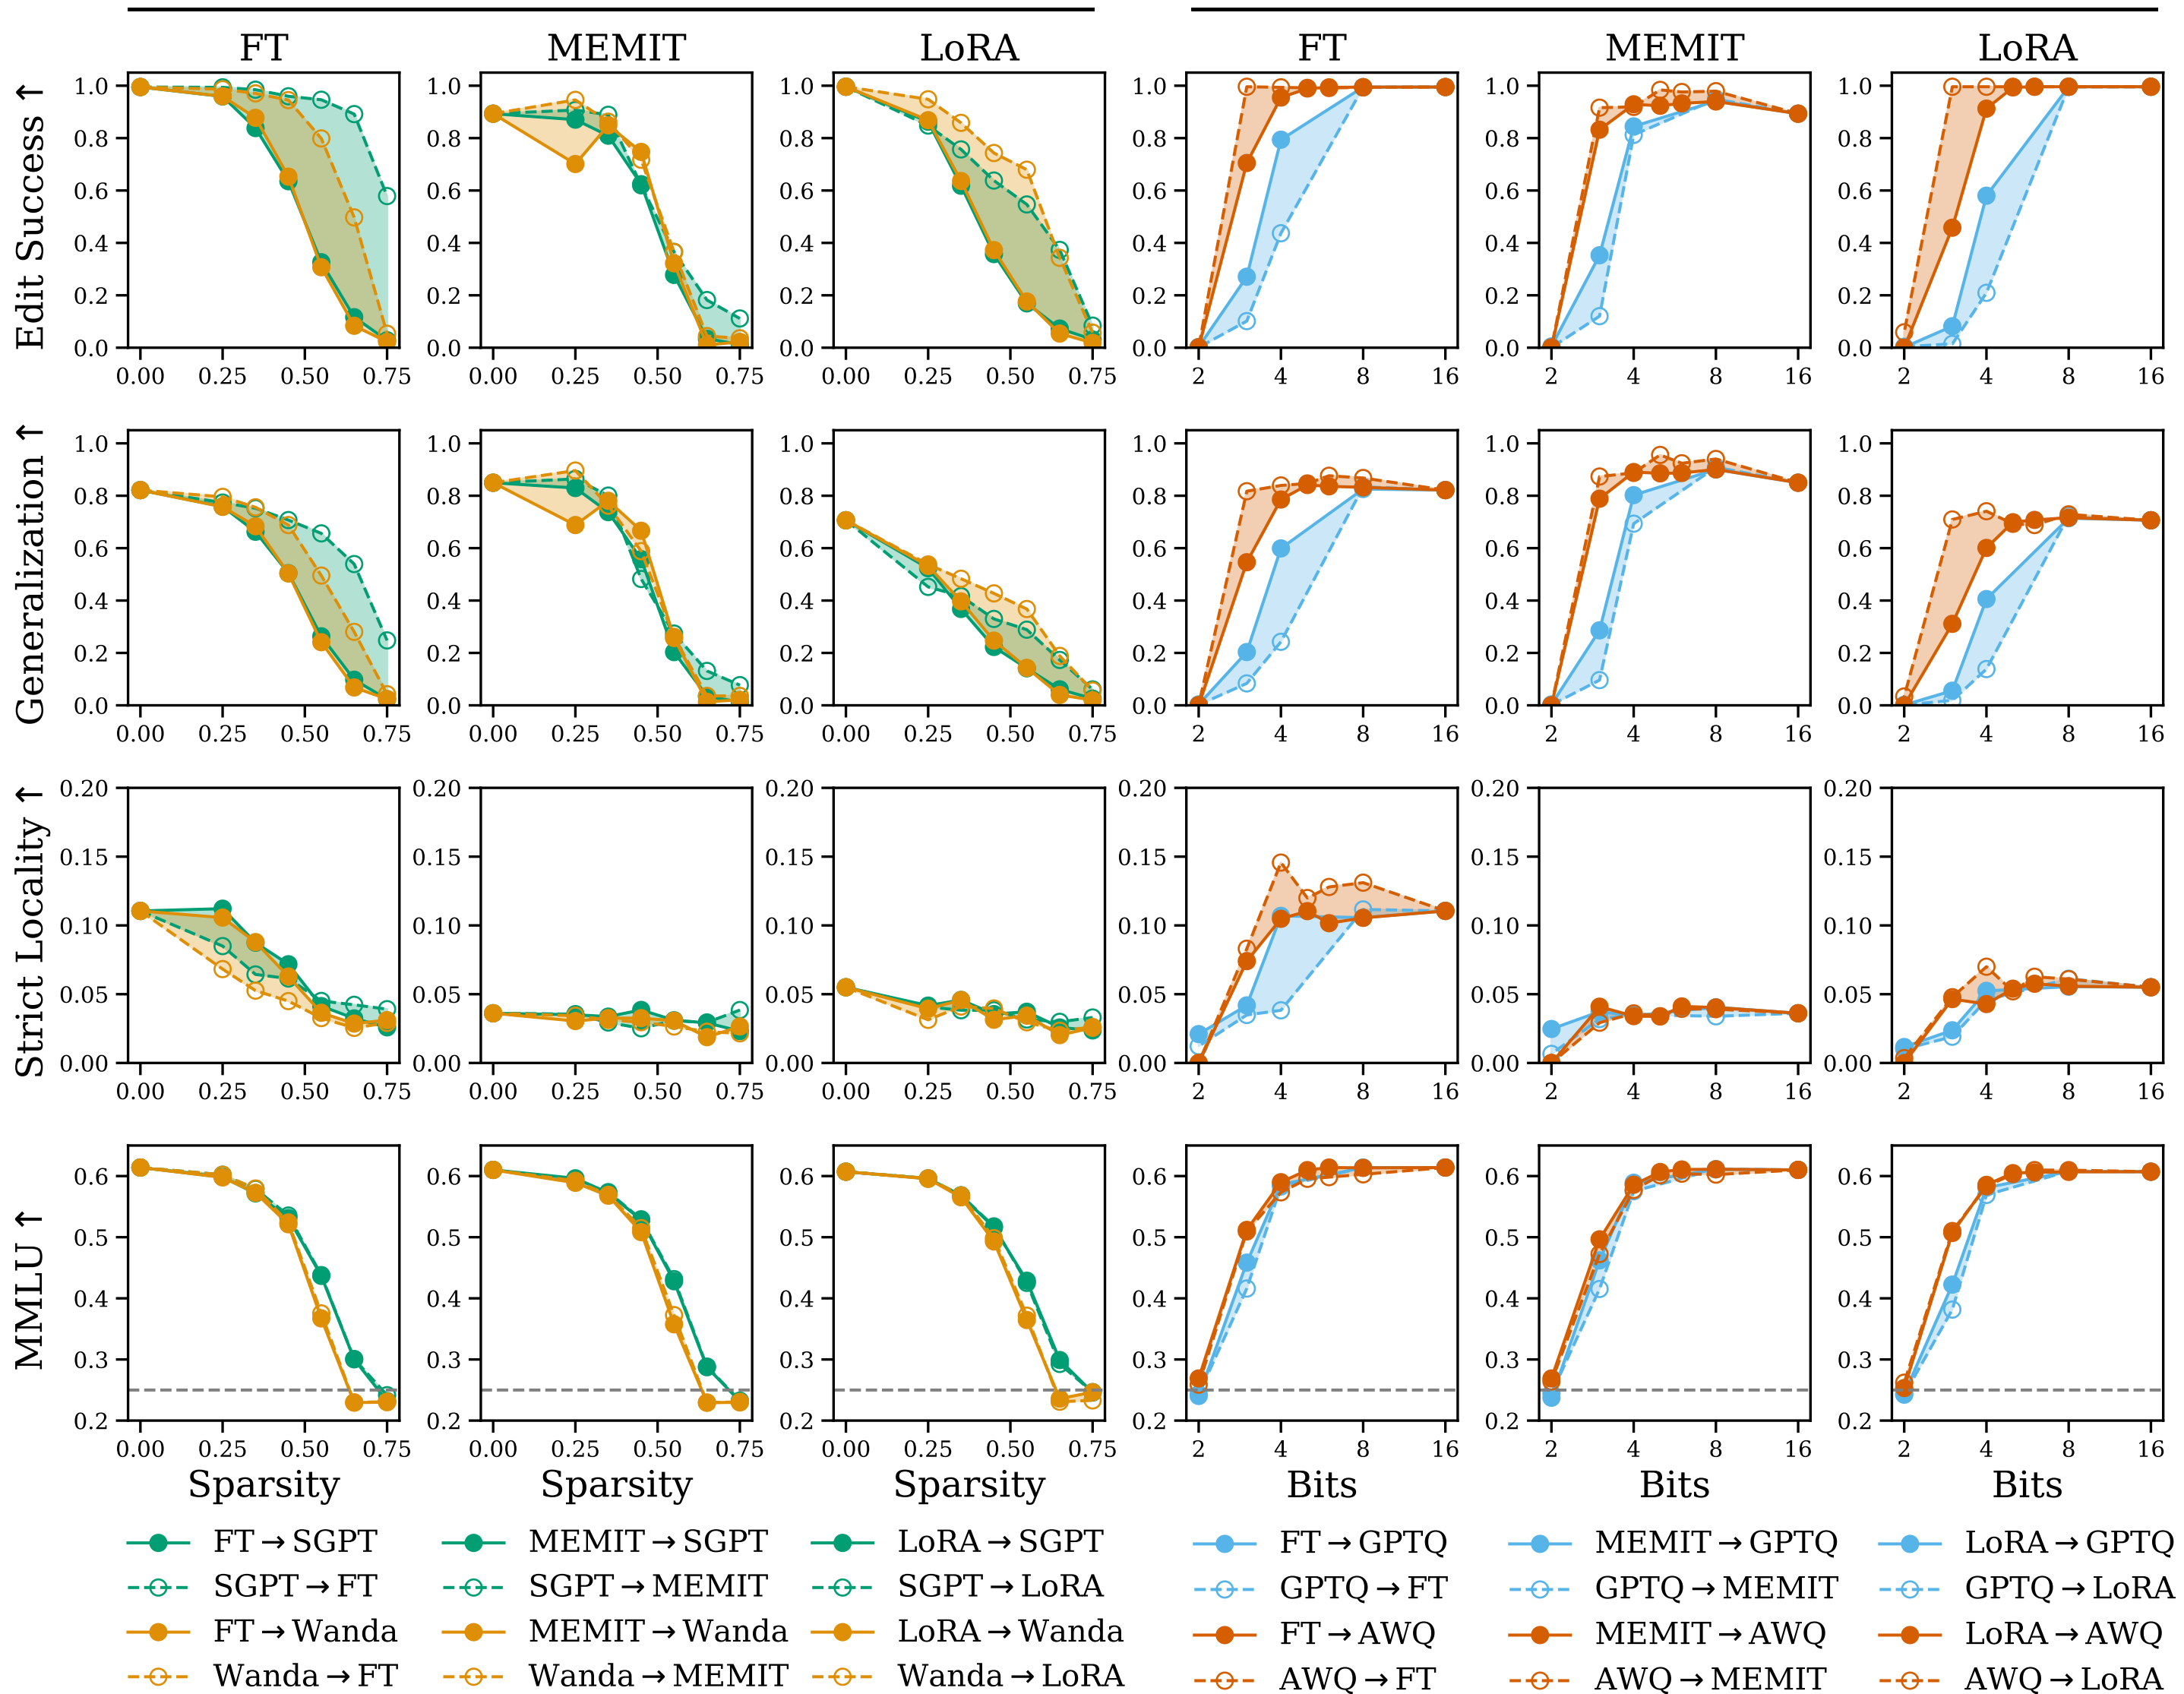

Supplement: supplementary_material [file attachment]

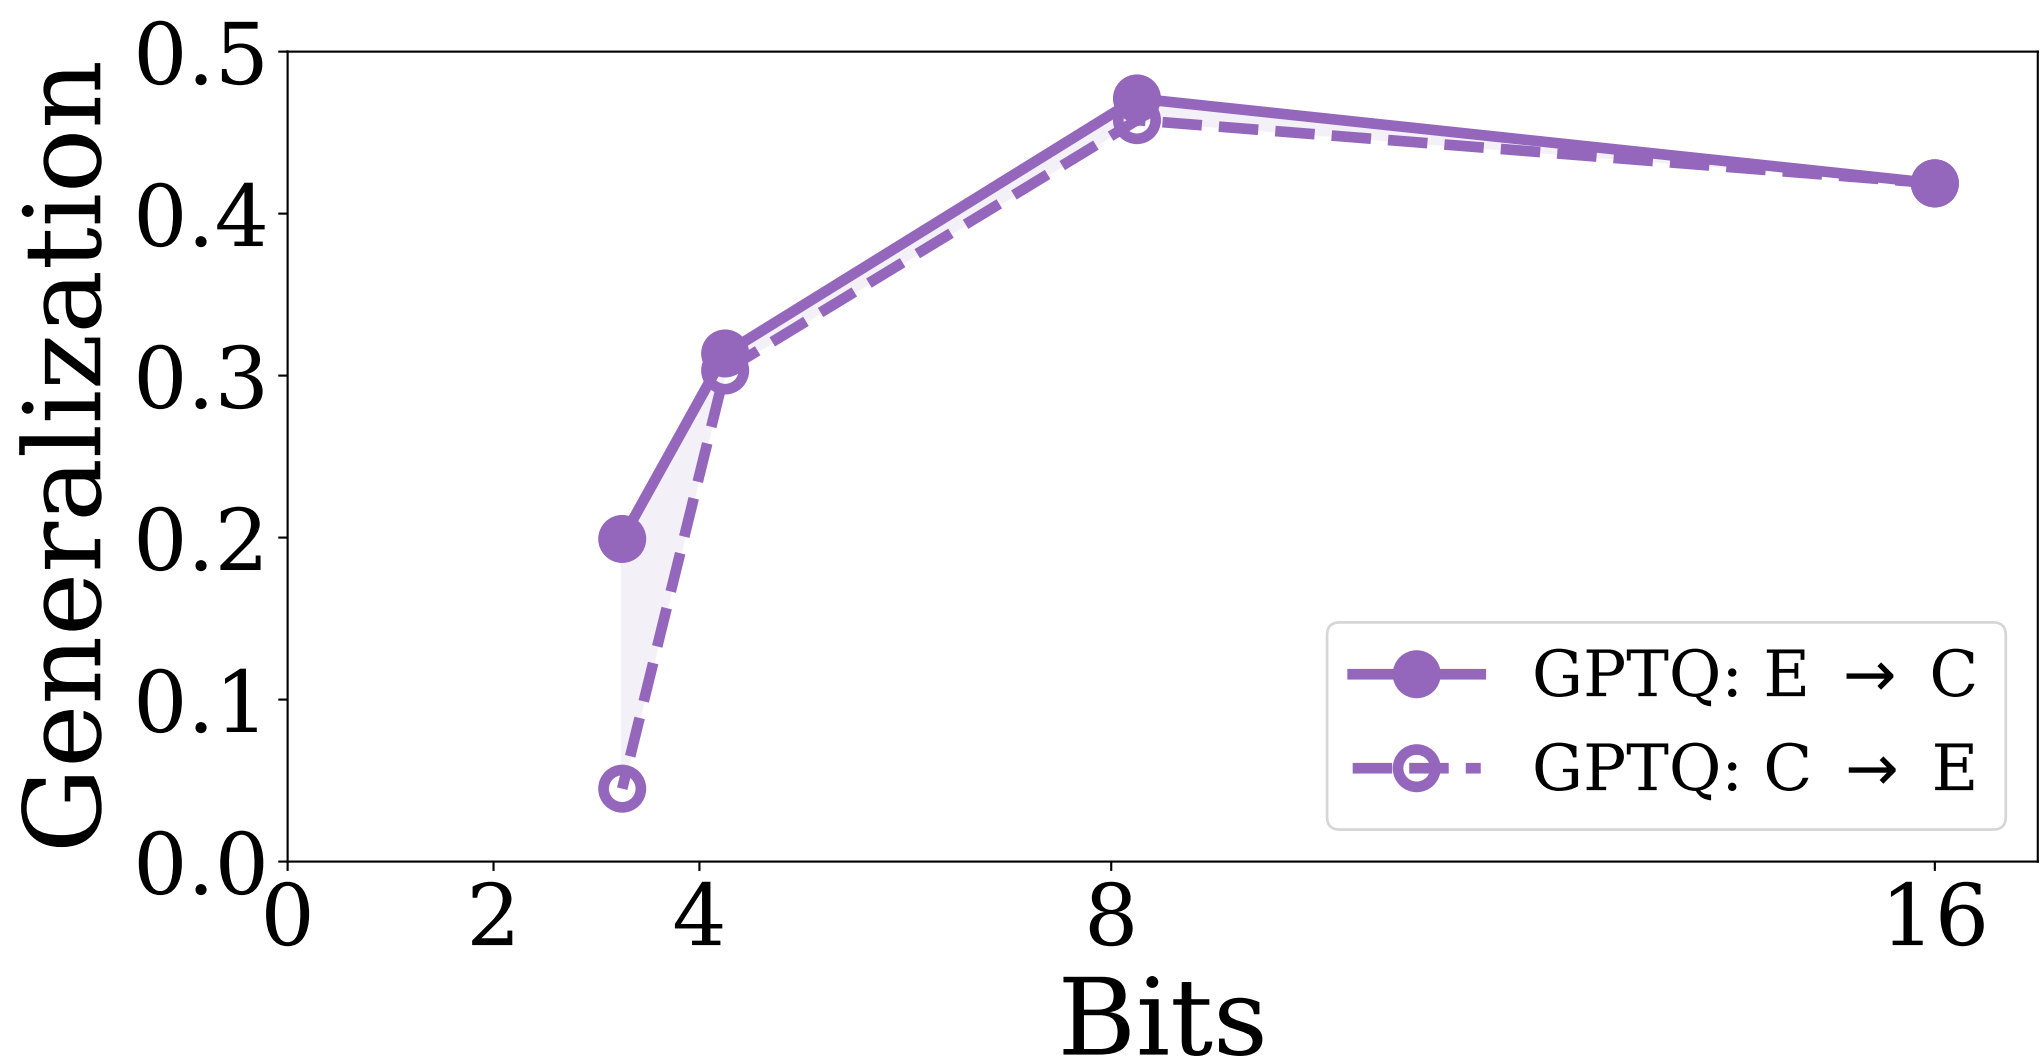

Supplement: supplementary_material [file attachment]

Pruning

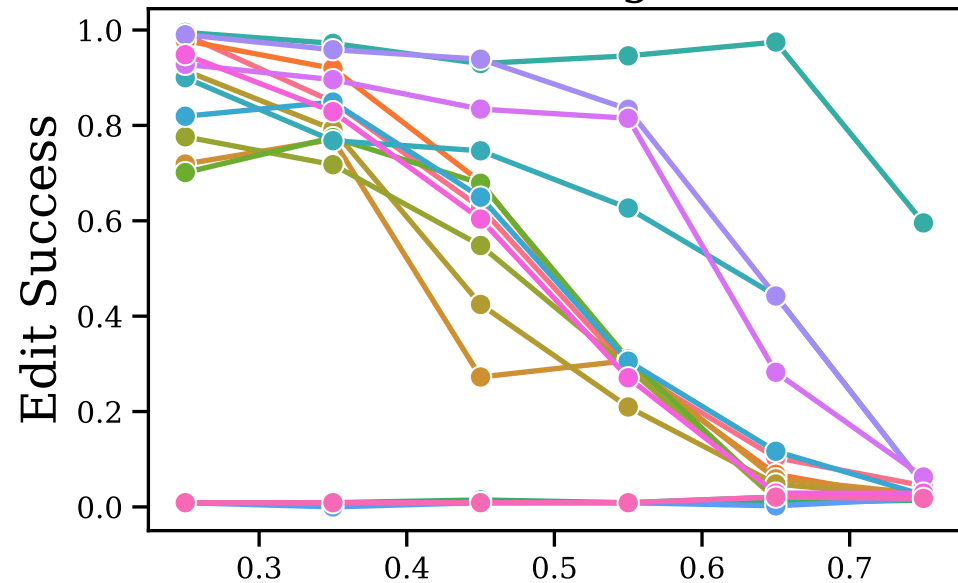

Generalization

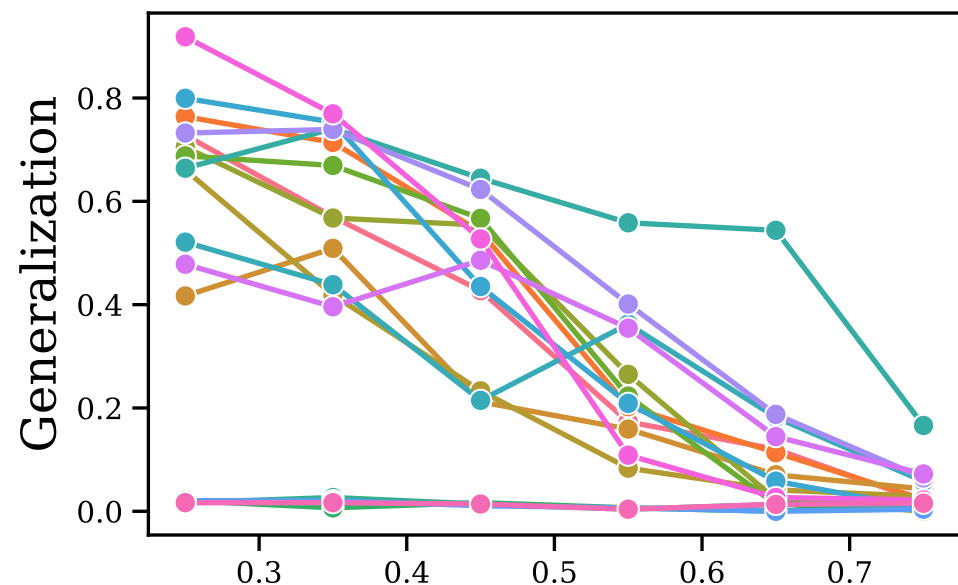

MMLU

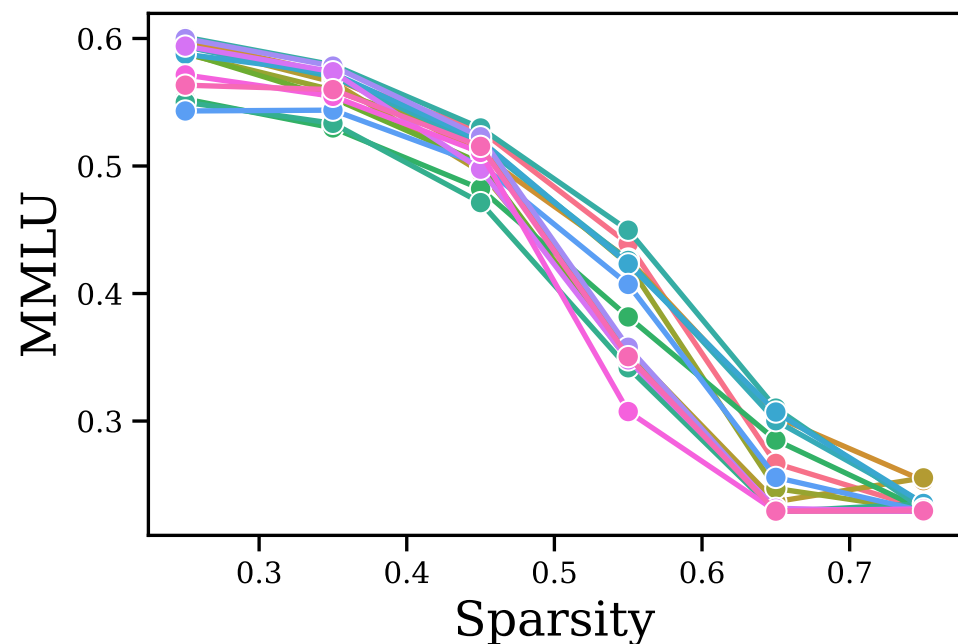

Sparsity

Quantization

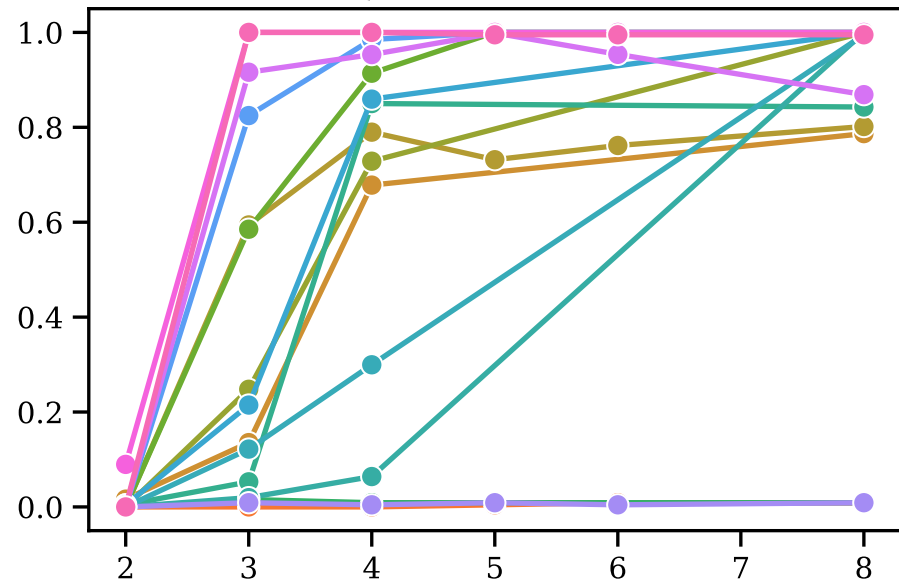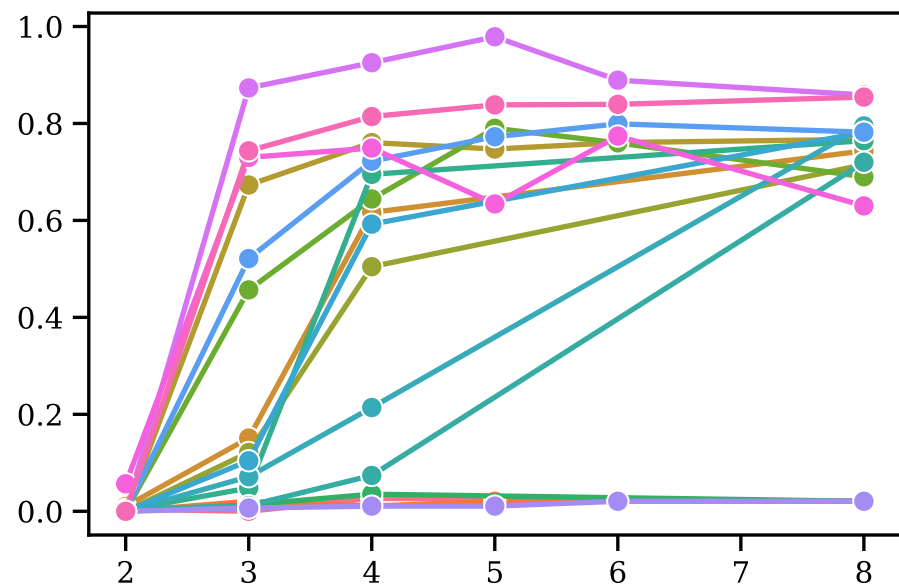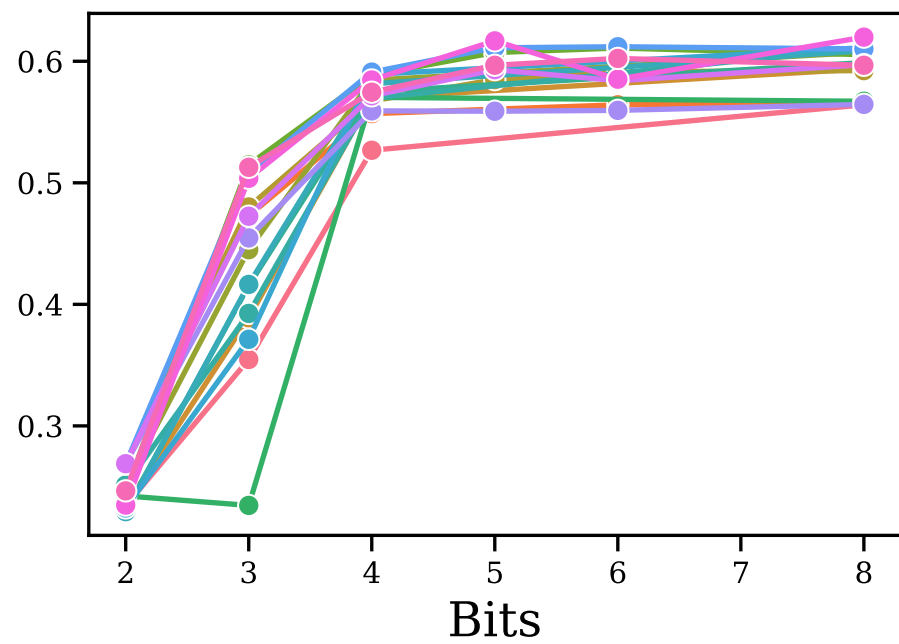

Bits

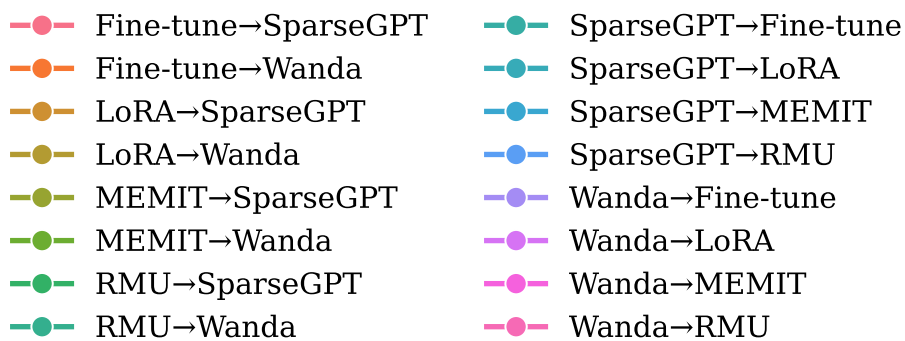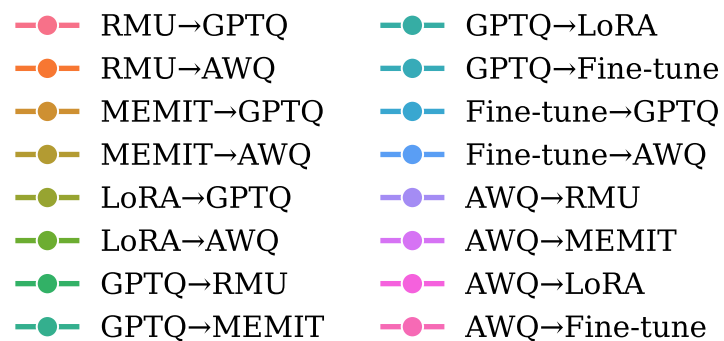

Supplement: supplementary_material [file attachment]

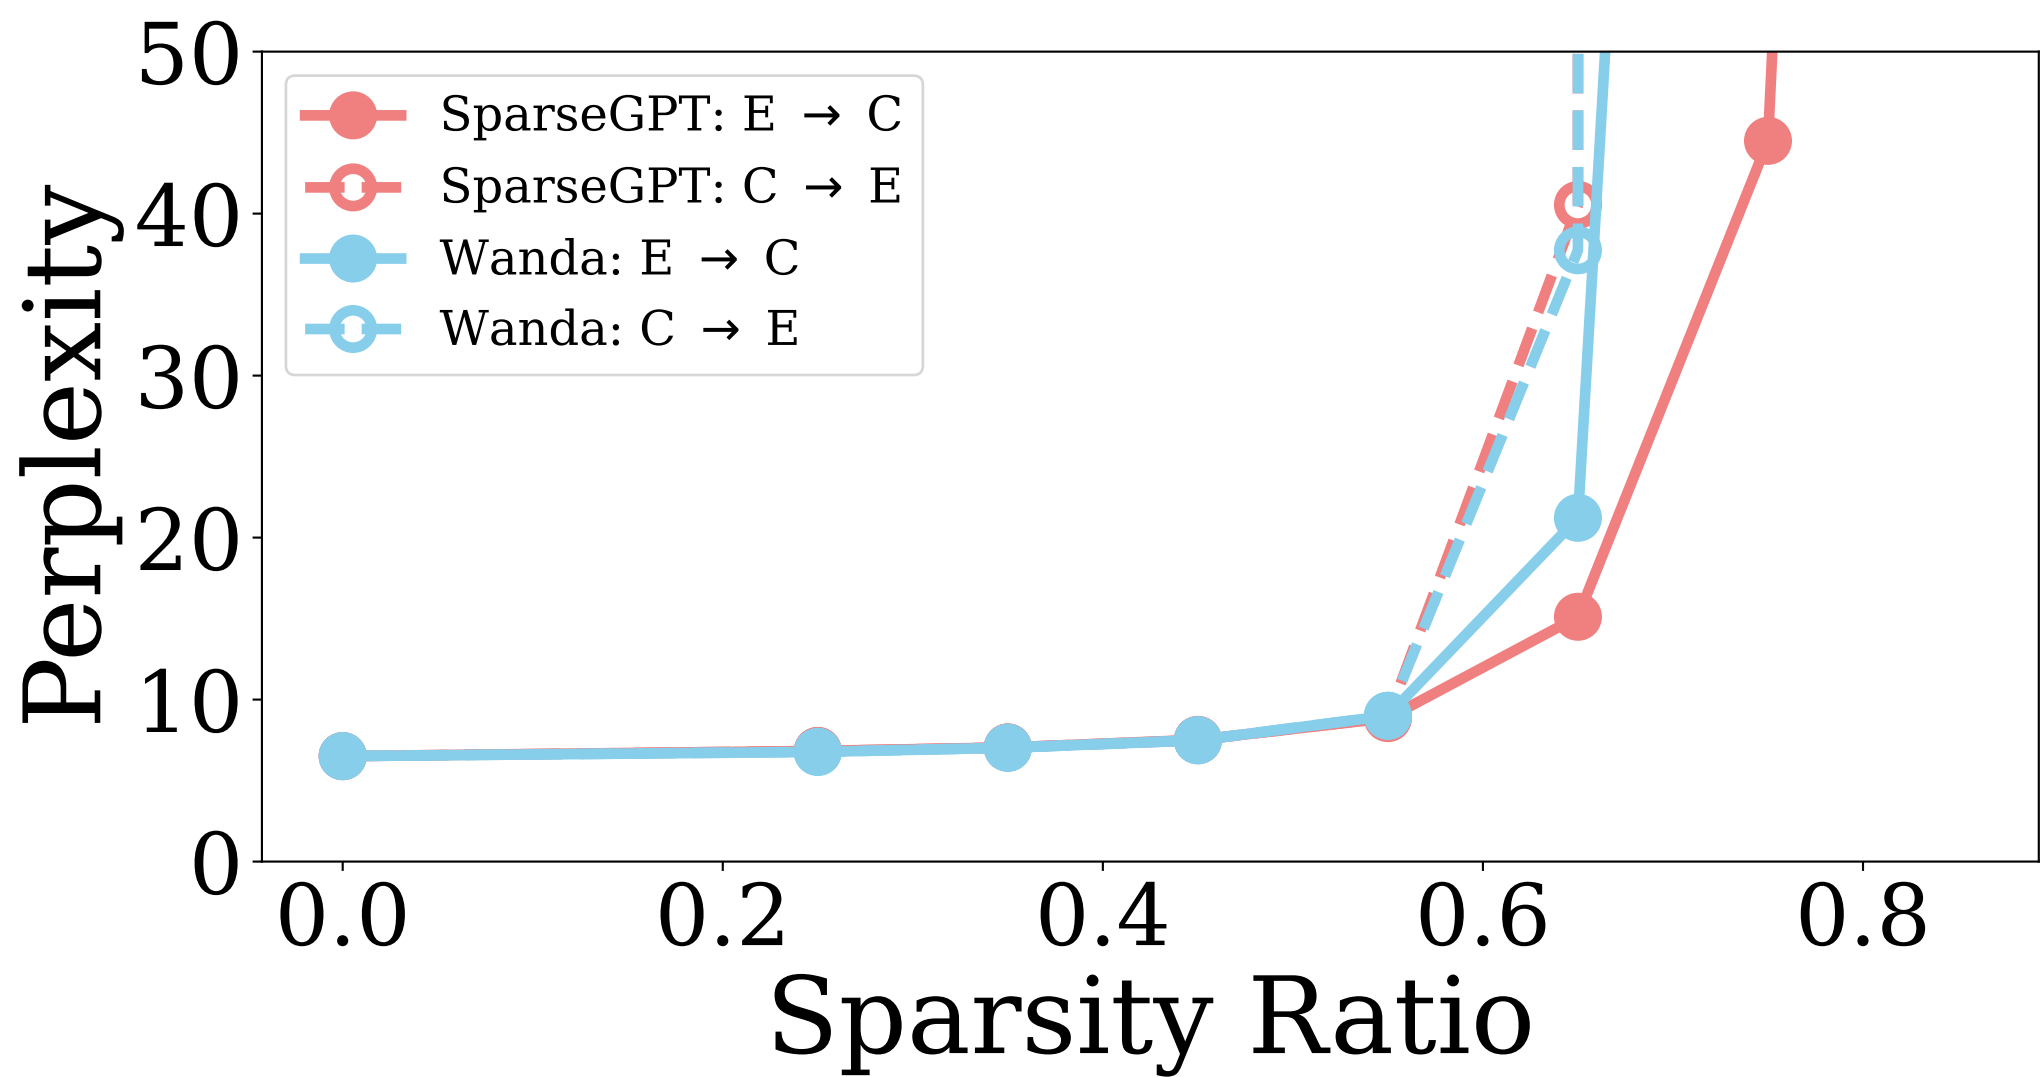

Supplement: supplementary_material [file attachment]

Perplexity

10

5

0

0

2

4

8

16

Bits

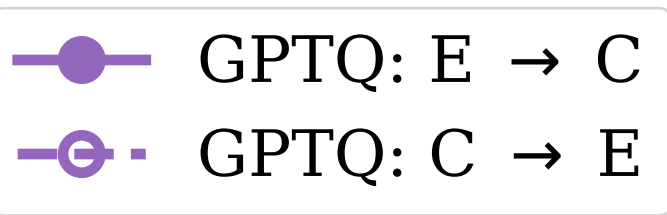

Supplement: supplementary_material [file attachment]

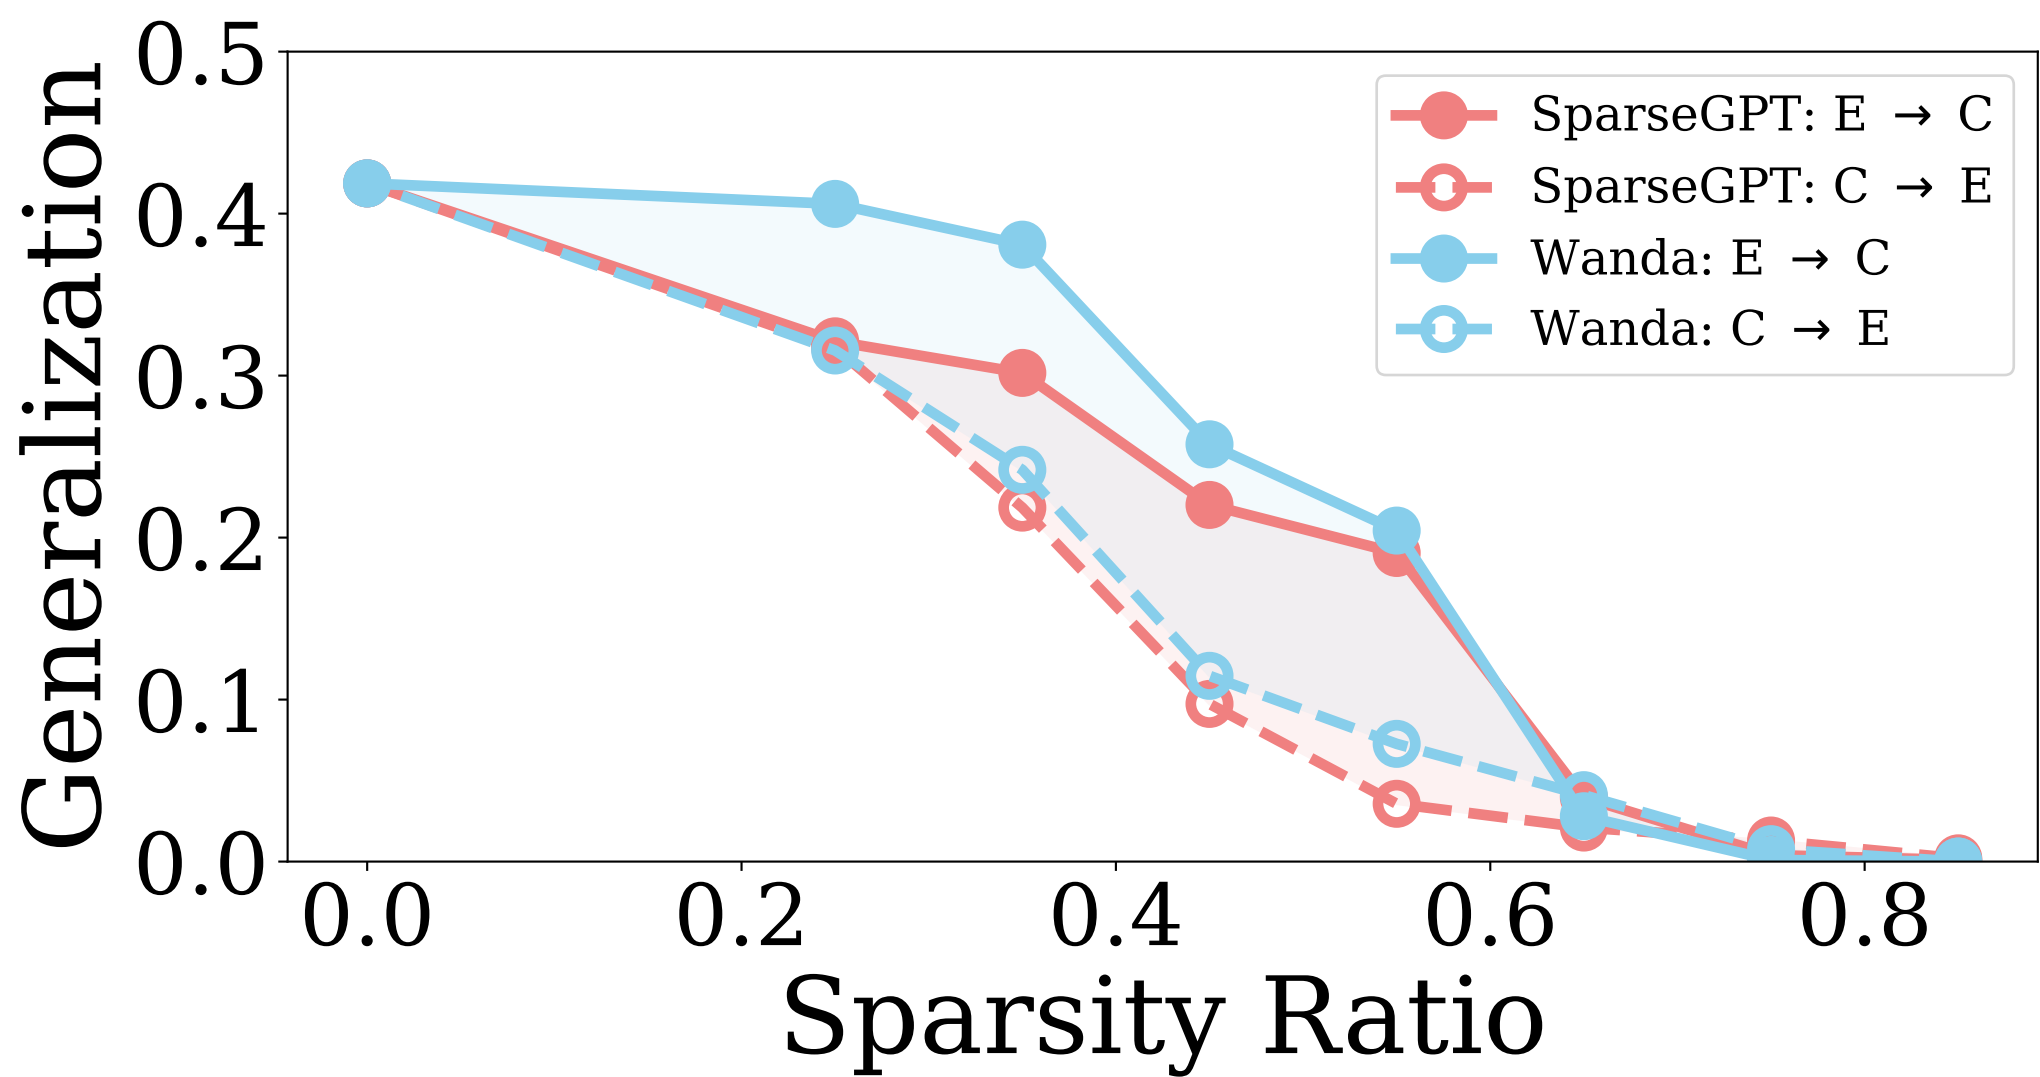

Supplement: supplementary_material [file attachment]

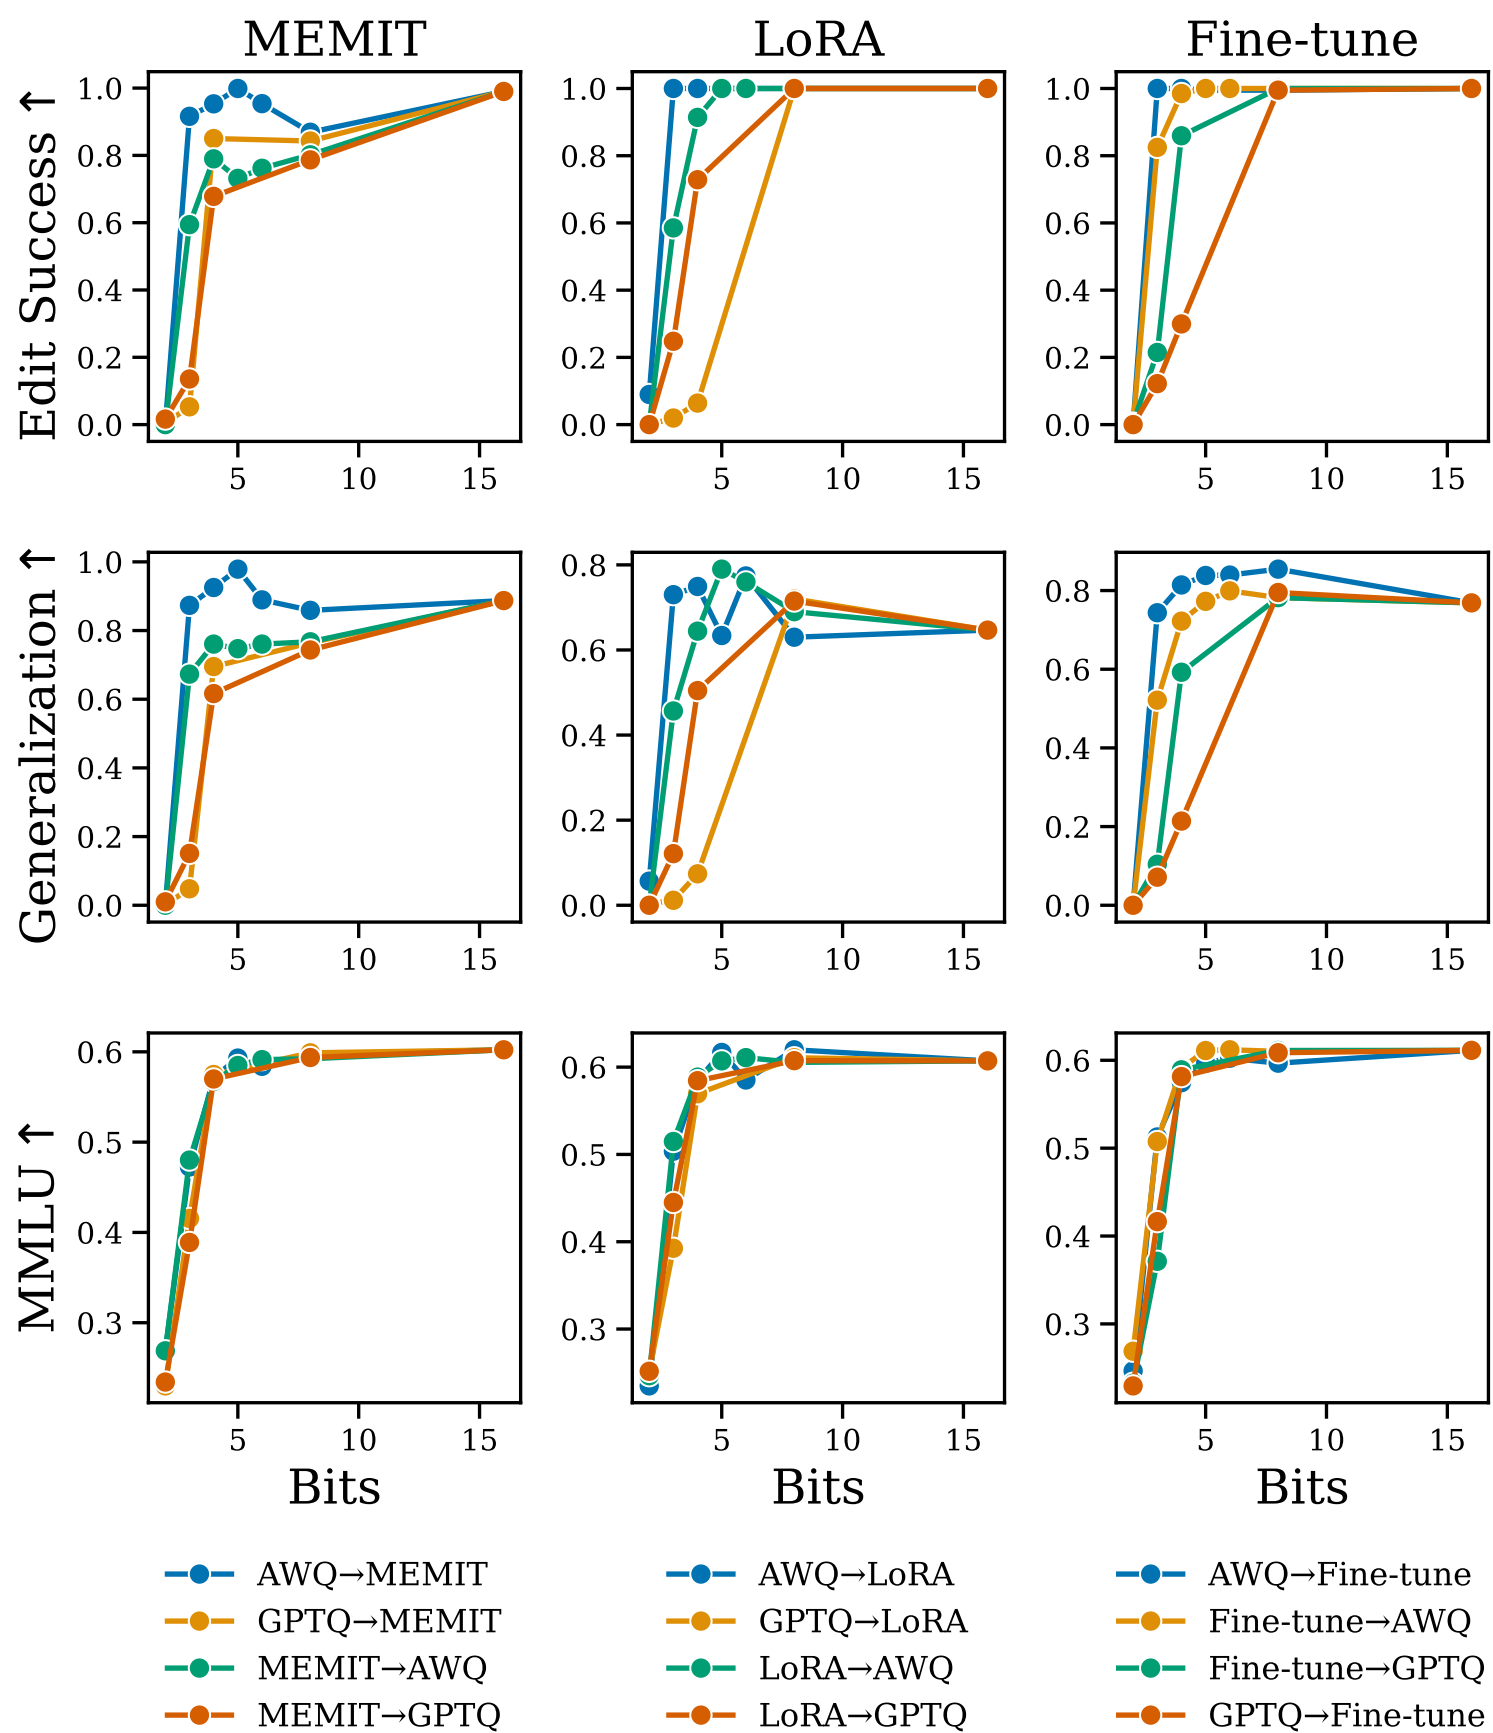

Supplement: supplementary_material [file attachment]

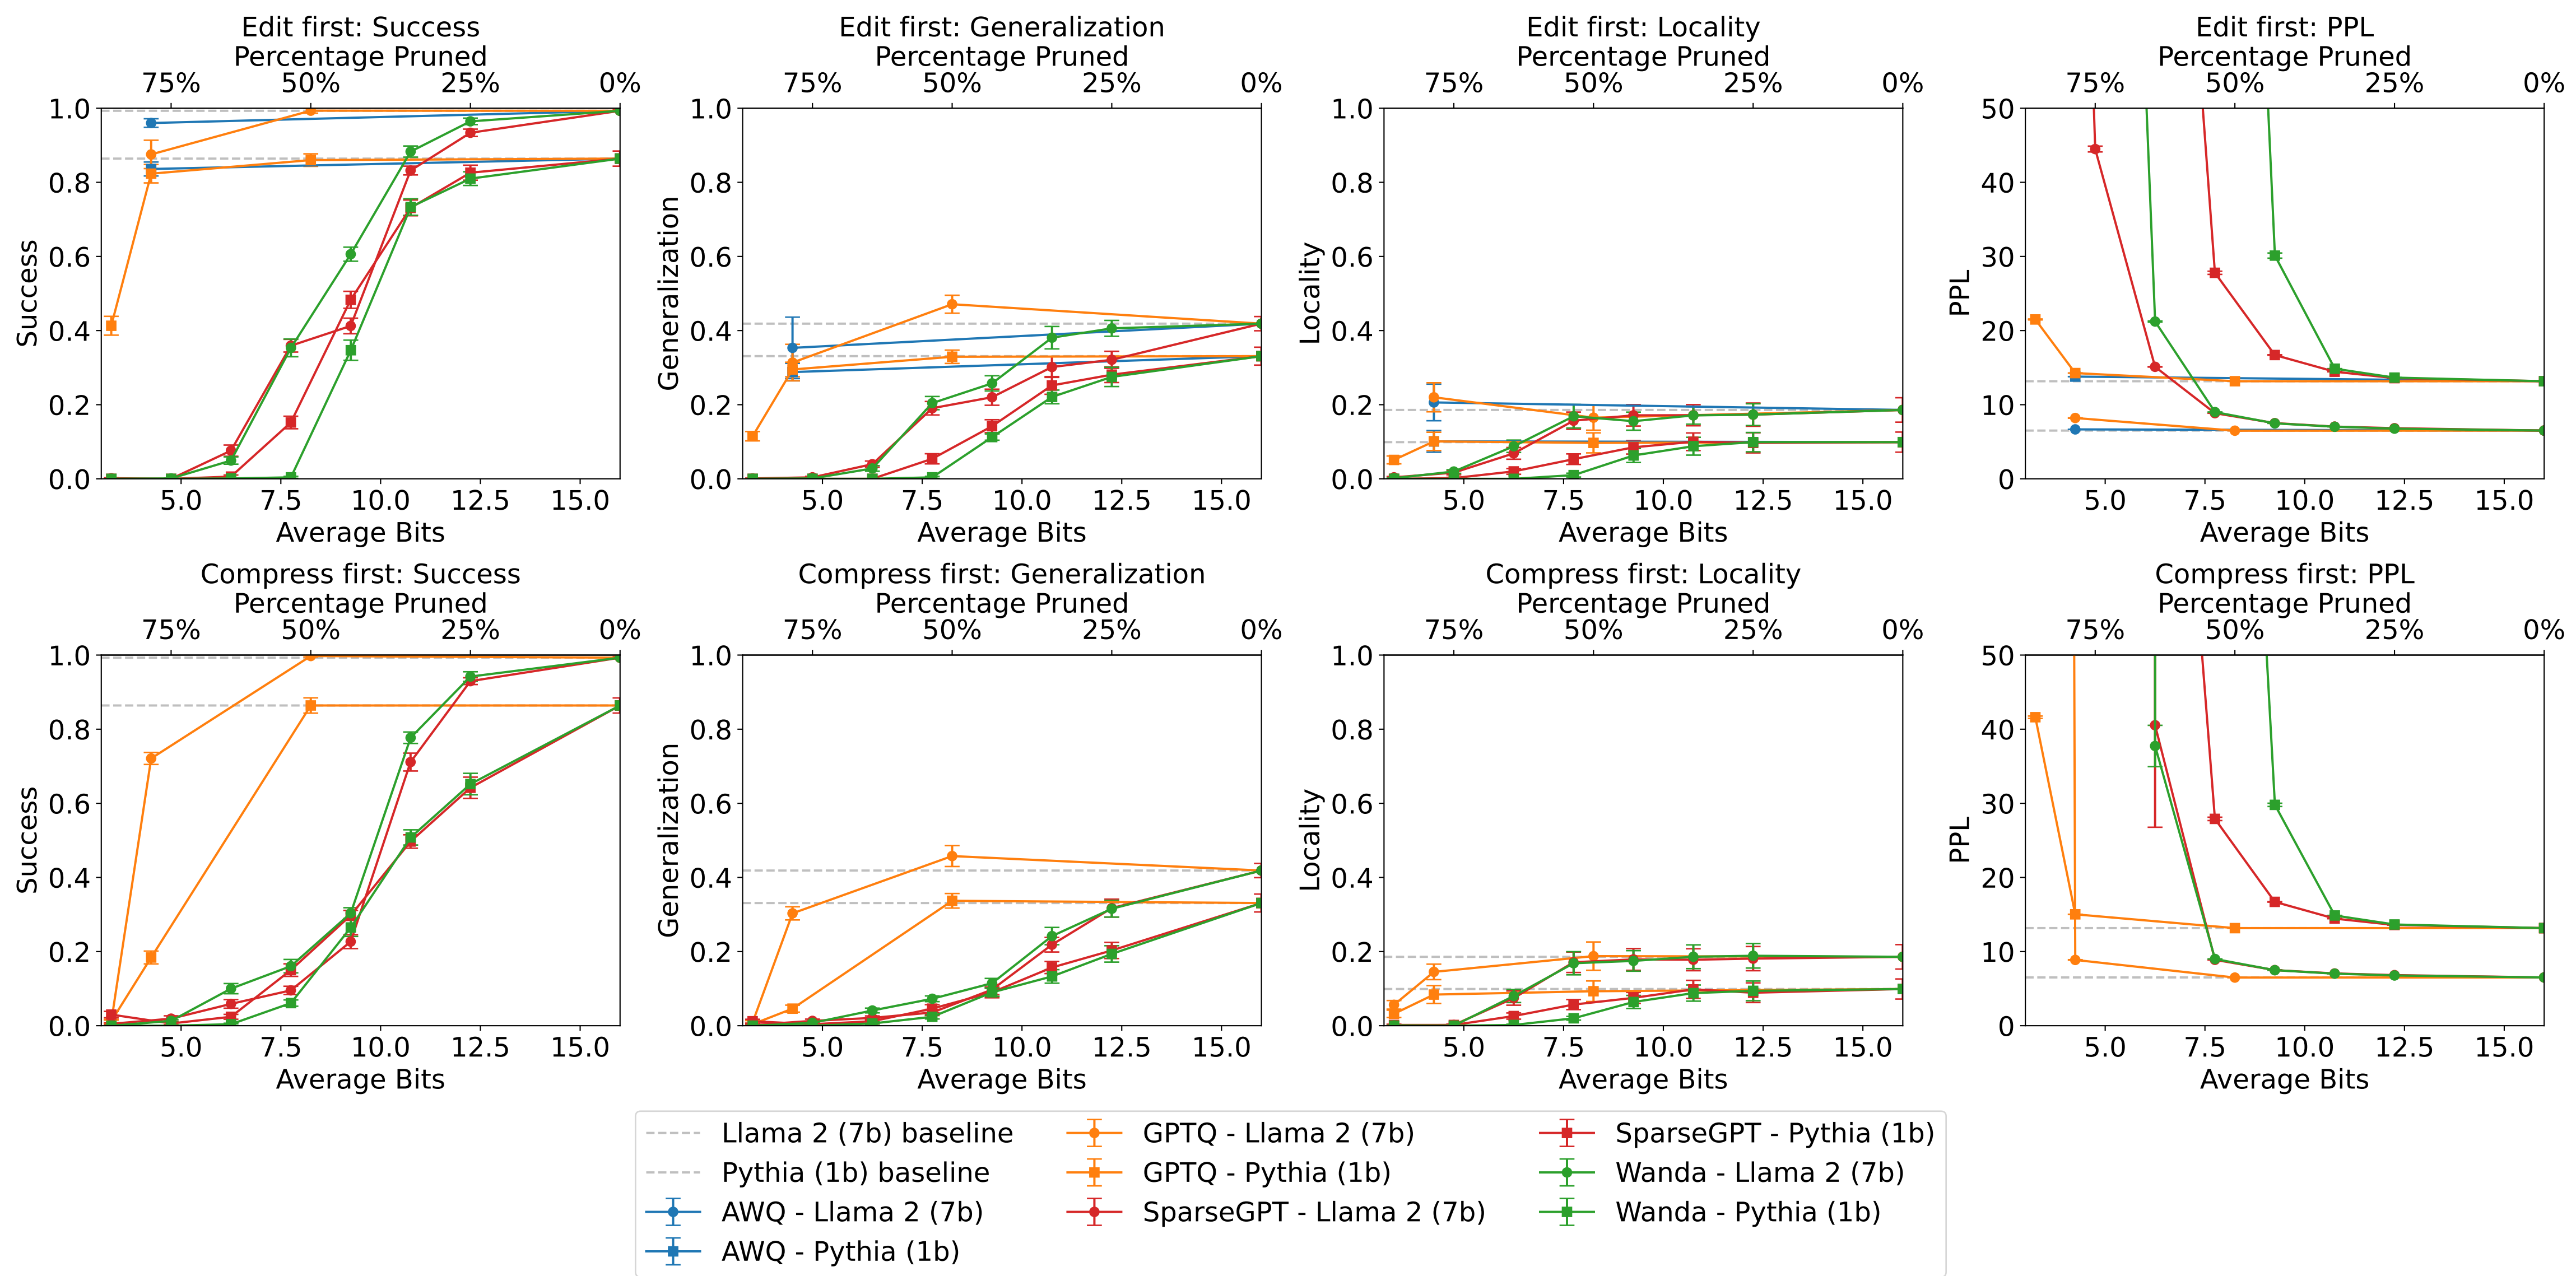

Supplement: supplementary_material [file attachment]

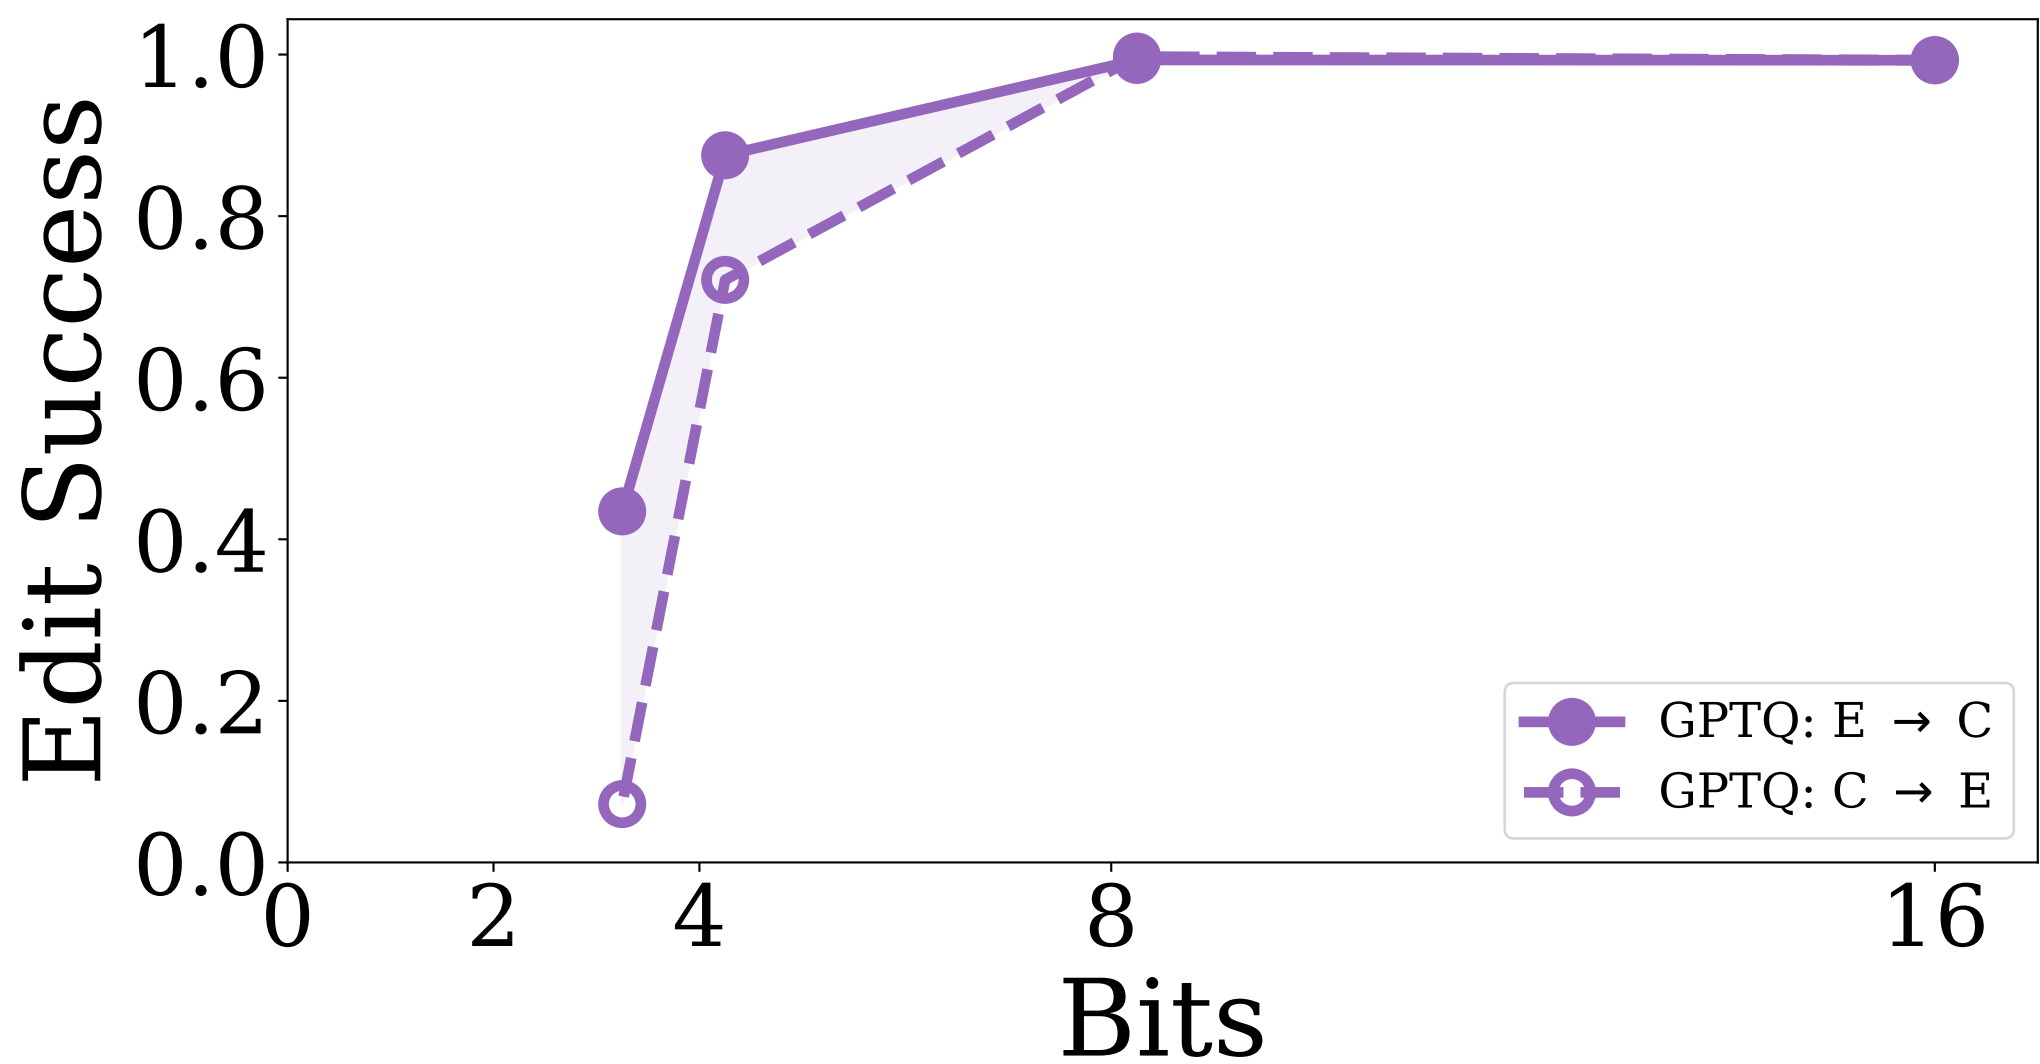

Supplement: supplementary_material [file attachment]

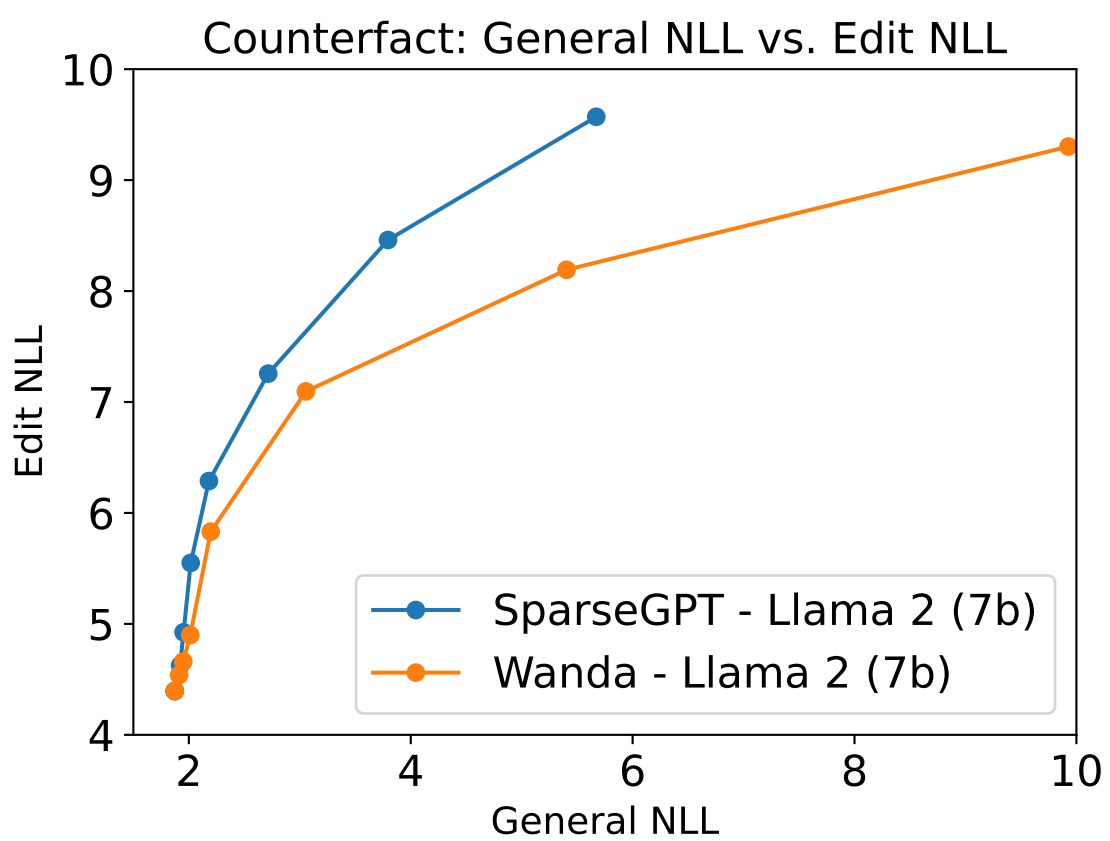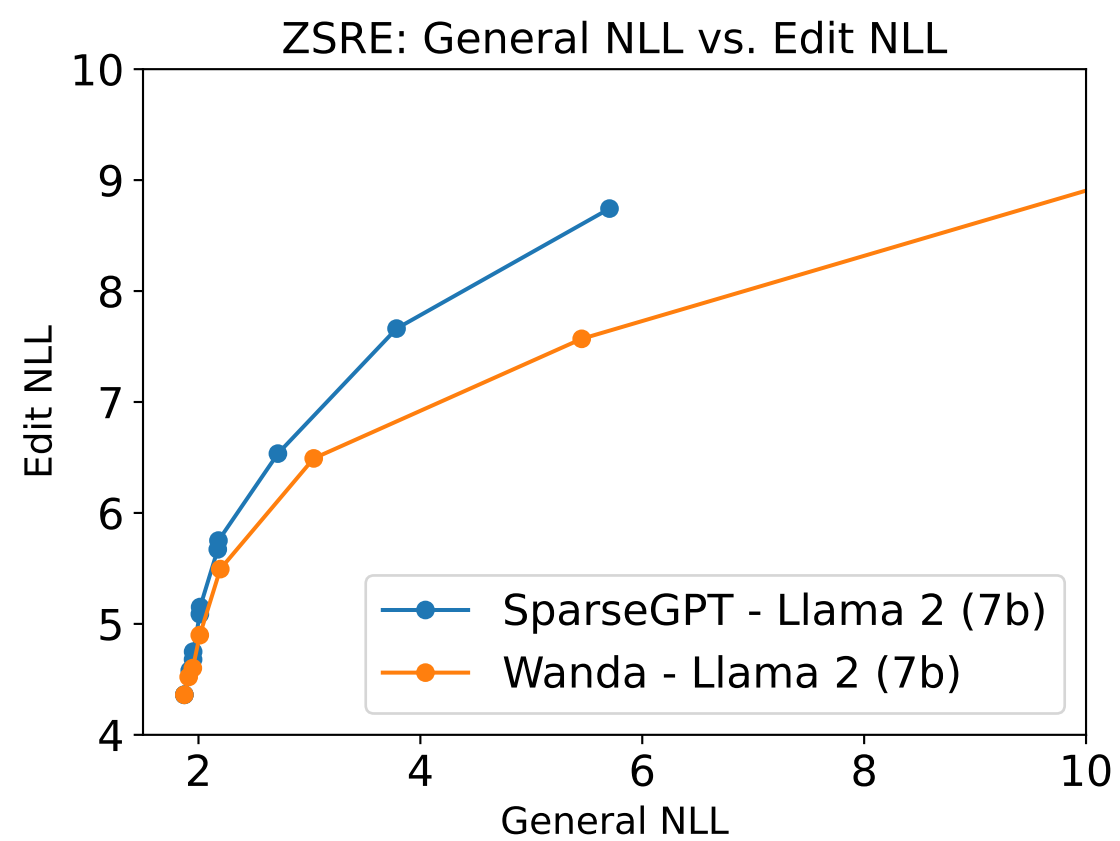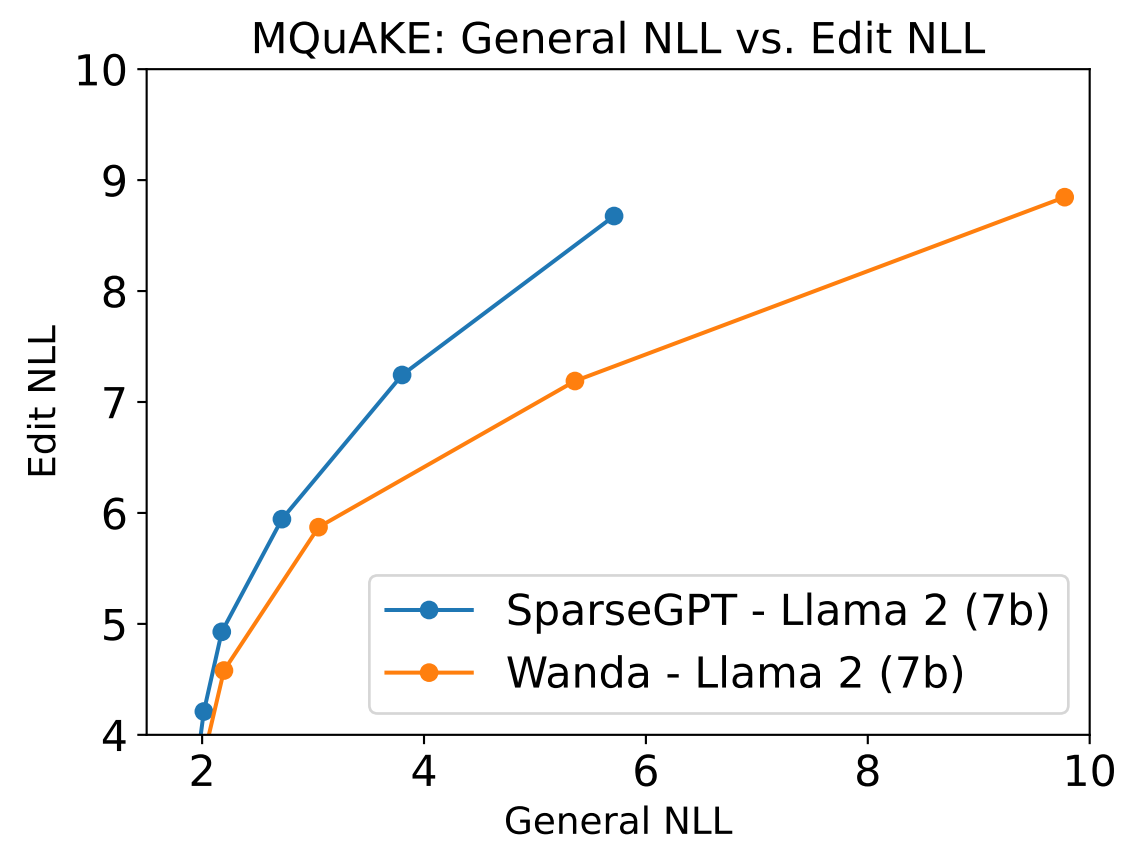

Supplement: supplementary_material [file attachment]
